# Supplementary material for: The direct synthesis of N-alkylated amides via a tandem hydration/N-alkylation reaction from nitriles, aldoximes and alcohols
Source: Royal Society of Chemistry journal article supplement (doi:10.1039/c4cc02742f), 2014-01-01

## Electronic Supplementary Information for

### **Direct synthesis of *N*-alkylated amides *via* tandem hydration/*N*-alkylation reaction from nitriles, aldoximes and alcohols**

Nana Wang, Xiaoyuan Zou, Juan Ma and Feng Li\*

Key Laboratory for Soft Chemistry and Functional Materials, Ministry of Education, Nanjing University of Science and Technology, Nanjing 210094, P. R. China

#### **General Experimental Details**

High-resolution mass spectra (HRMS) were obtained on a HPLC-Q-ToF MS(Micro) spectrometer and are reported as  $m/z$  (relative intensity). Accurate masses are reported for the molecular ion  $[M+Na]^+$ . Proton nuclear magnetic resonance ( $^1H$  NMR) spectra were recorded at 500 MHz using a Bruker Avance 500 spectrometer. Chemical shifts are reported in delta ( $\delta$ ) units, parts per million (ppm) downfield from tetramethylsilane or ppm relative to the center of the singlet at 7.26 ppm for  $CDCl_3$  and 2.50 ppm for  $DMSO-d_6$ . Coupling constants  $J$  values are reported in Hertz (Hz), and the splitting patterns were designated as follows: s, singlet; d, doublet; t, triplet; m, multiplet; b, broad. Carbon-13 nuclear magnetic resonance ( $^{13}C$  NMR) spectra were recorded at 125 MHz using a Bruker Avance 500 spectrometer. Chemical shifts are reported in delta ( $\delta$ ) units, ppm relative to the center of the triplet at 77.0 ppm for  $CDCl_3$  and 39.5 ppm for  $DMSO-d_6$ .  $^{13}C$  NMR spectra were routinely run with broadband decoupling.

All reactions were run under an atmosphere of nitrogen, unless otherwise indicated. Anhydrous solvents were transferred *via* oven-dried syringe. Reaction tubes were oven-dried and cooled under a stream of nitrogen. Reaction tubes were purchased from Beijing Synthware Glass Inc. Analytical thin-layer chromatography (TLC) was carried out using 0.2-mm commercial silica gel plates.

**General procedure for iridium-catalyzed tandem synthesis of *N*-alkylated amines from nitriles, aldoxime and alcohols.** To an oven-dried, nitrogen purged 25 ml Schlenk tube were added  $[Cp^*IrCl_2]_2$  (0.01 mmol, 1 mol%), nitrile (1 mmol), *n*-butylaldoxime (1.1 mmol, 1.1 equiv.) and toluene (1 ml), and the mixture was heated at 100 °C for 6 h. The reaction mixture was allowed to cool to ambient temperature and alcohol (1.3 mmol) and  $Cs_2CO_3$  (0.2 mmol, 0.2 equiv.) were added. The Schlenk tube was flushed with nitrogen and the mixture was further heated at 130 °C for 12h. The reaction mixture was cooled to ambient temperature, concentrated in *vacuo* and purified by flash column chromatography with hexanes/ethyl acetate to afford the corresponding product.

### N-benzylbenzamide (5aa)<sup>1</sup>

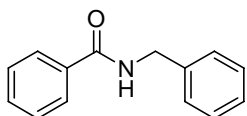

1) **1a** (103 mg, 1 mmol), **2b** (96 mg, 1.1 mmol), [Cp\*IrCl<sub>2</sub>]<sub>2</sub> (8 mg, 0.01 mol, 1 mol%), toluene (1 ml);  
2) **3a** (140 mg, 1.3 mmol), Cs<sub>2</sub>CO<sub>3</sub> (65 mg, 0.2 equiv.).

**5aa**, yellow solid, 179 mg, 85% yield.

mp 96-97 °C (lit.<sup>1</sup> mp 105 °C); <sup>1</sup>H NMR (500 MHz, CDCl<sub>3</sub>) δ 7.79 (d, *J* = 7.6 Hz, 2H, ArH), 7.50 (t, *J* = 7.4 Hz, 1H, ArH), 7.42 (t, *J* = 7.6 Hz, 2H, ArH), 7.36-7.35 (m, 4H, ArH), 7.32-7.28 (m, 1H, ArH), 6.46 (br s, 1H, NH), 4.65 (d, *J* = 5.6 Hz, 2H, CH<sub>2</sub>); <sup>13</sup>C NMR (125 MHz, CDCl<sub>3</sub>) δ 167.3, 138.2, 134.3, 131.5, 128.7, 128.5, 127.9, 127.6, 126.9, 44.1.

### N-(4-methylbenzyl)benzamide (5ab)<sup>2</sup>

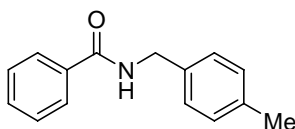

1) **1a** (103 mg, 1 mmol), **2b** (96 mg, 1.1 mmol), [Cp\*IrCl<sub>2</sub>]<sub>2</sub> (8 mg, 0.01 mol, 1 mol%), toluene (1 ml);  
2) **3b** (159 mg, 1.3 mmol), Cs<sub>2</sub>CO<sub>3</sub> (65 mg, 0.2 equiv.).

**5ab**, light grey solid, 180 mg, 80% yield.

mp 137-138 °C (lit.<sup>2</sup> mp 137 °C); <sup>1</sup>H NMR (500 MHz, CDCl<sub>3</sub>) δ 7.78 (d, *J* = 7.3 Hz, 2H, ArH), 7.49 (t, *J* = 7.4 Hz, 1H, ArH), 7.42 (t, *J* = 7.6 Hz, 2H, ArH), 7.25 (d, *J* = 7.8 Hz, 2H, ArH), 7.16 (d, *J* = 7.8 Hz, 2H, ArH), 6.36 (br s, 1H, NH), 4.60 (d, *J* = 5.6 Hz, 2H, CH<sub>2</sub>), 2.35 (s, 3H, CH<sub>3</sub>); <sup>13</sup>C NMR (125 MHz, CDCl<sub>3</sub>) δ 167.3, 137.2, 135.1, 134.4, 131.4, 129.3, 128.4, 127.8, 126.9, 43.8, 21.0.

### N-(4-methoxybenzyl)benzamide (5ac)<sup>3</sup>

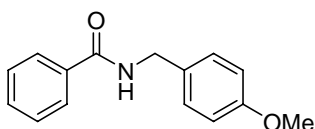

1) **1a** (103 mg, 1 mmol), **2b** (96 mg, 1.1 mmol), [Cp\*IrCl<sub>2</sub>]<sub>2</sub> (8 mg, 0.01 mol, 1 mol%), toluene (1 ml);  
2) **3c** (180 mg, 1.3 mmol), Cs<sub>2</sub>CO<sub>3</sub> (65 mg, 0.2 equiv.).

**5ac**, pale grey solid, 207 mg, 86% yield.

mp 96-97 °C (lit.<sup>3</sup> mp 97-98 °C); <sup>1</sup>H NMR (500 MHz, CDCl<sub>3</sub>) δ 7.78 (d, *J* = 7.2 Hz, 2H, ArH), 7.50 (t, *J* = 7.4 Hz, 1H, ArH), 7.42 (t, *J* = 7.5 Hz, 2H, ArH), 7.29 (d, *J* = 8.4 Hz, 2H, ArH), 6.89 (d, *J* = 8.7 Hz, 2H, ArH), 6.32 (br s, 1H, NH), 4.58 (d, *J* = 5.6 Hz, 2H, CH<sub>2</sub>), 3.81 (s, 3H, OCH<sub>3</sub>); <sup>13</sup>C NMR (125 MHz, CDCl<sub>3</sub>) δ 167.2, 159.2, 134.5, 131.5, 130.2, 129.3, 128.6, 126.9, 114.2, 55.3, 43.7.

### N-(4-fluorobenzyl)benzamide (5ad)<sup>4</sup>

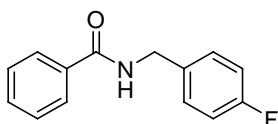

1) **1a** (103 mg, 1 mmol), **2b** (96 mg, 1.1 mmol), [Cp\*IrCl<sub>2</sub>]<sub>2</sub> (8 mg, 0.01 mol, 1 mol%), toluene (1 ml);  
2) **3d** (164 mg, 1.3 mmol), Cs<sub>2</sub>CO<sub>3</sub> (65 mg, 0.2 equiv.).

**5ad**, creamy white solid, 195 mg, 85% yield.

mp 107-108 °C (lit.<sup>4</sup> mp 114-116 °C); <sup>1</sup>H NMR (500 MHz, CDCl<sub>3</sub>) δ 7.79 (d, *J* = 7.3 Hz, 2H, ArH), 7.51 (t, *J* = 7.4 Hz, 1H, ArH), 7.43 (t, *J* = 7.6 Hz, 2H, ArH), 7.33 (dd, *J* = 8.4 Hz and 5.6 Hz, 2H, ArH), 7.03 (t, *J* = 8.6 Hz, 2H, ArH), 6.44 (br s, 1H, NH), 4.62 (d, *J* = 5.8 Hz, 2H, CH<sub>2</sub>); <sup>13</sup>C NMR (125 MHz, CDCl<sub>3</sub>) δ 167.4, 162.2 (d, *J*<sub>C-F</sub> = 244.7 Hz), 134.2, 134.0, 131.6, 129.5 (d, *J*<sub>C-F</sub> = 8.0 Hz), 128.6, 126.9, 115.5 (d, *J*<sub>C-F</sub> = 21.3 Hz), 43.3.

#### N-(2-Chlorobenzyl)-benzamide (**5ae**)<sup>5</sup>

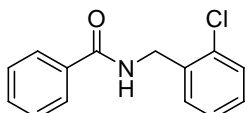

1) **1a** (103 mg, 1 mmol), **2b** (96 mg, 1.1 mmol), [Cp\*IrCl<sub>2</sub>]<sub>2</sub> (8 mg, 0.01 mol, 1 mol%), toluene (1 ml);  
2) **3e** (185 mg, 1.3 mmol), Cs<sub>2</sub>CO<sub>3</sub> (65 mg, 0.2 equiv.).

**5ae**, light yellow solid, 204 mg, 83% yield.

mp 107-108 °C (lit.<sup>5</sup> mp 108-109 °C); <sup>1</sup>H NMR (500 MHz, CDCl<sub>3</sub>) δ 7.78 (d, *J* = 7.5 Hz, 2H, ArH), 7.51-7.38 (m, 5H, ArH), 7.26-7.24 (m, 2H, ArH), 6.62 (br s, 1H, NH), 4.74 (d, *J* = 5.9 Hz, 2H, CH<sub>2</sub>); <sup>13</sup>C NMR (125 MHz, CDCl<sub>3</sub>) δ 167.4, 135.5, 134.1, 133.4, 131.5, 129.9, 129.4, 128.8, 128.4, 127.0, 126.9, 41.8.

#### N-(4-chlorobenzyl)benzamide (**5af**)<sup>6</sup>

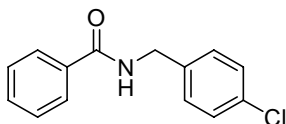

1) **1a** (103 mg, 1 mmol), **2b** (96 mg, 1.1 mmol), [Cp\*IrCl<sub>2</sub>]<sub>2</sub> (8 mg, 0.01 mol, 1 mol%), toluene (1 ml);  
2) **3f** (185 mg, 1.3 mmol), Cs<sub>2</sub>CO<sub>3</sub> (65 mg, 0.2 equiv.).

**5af**, creamy white solid, 195 mg, 79% yield.

mp 139-140 °C (lit.<sup>6</sup> mp 141 °C); <sup>1</sup>H NMR (500 MHz, CDCl<sub>3</sub>) δ 7.79 (d, *J* = 7.4 Hz, 2H, ArH), 7.51 (t, *J* = 7.3 Hz, 1H, ArH), 7.43 (t, *J* = 7.6 Hz, 2H, ArH), 7.32-7.27 (m, 4H, ArH), 6.46 (br s, 1H, NH), 4.61 (d, *J* = 5.7 Hz, 2H, CH<sub>2</sub>); <sup>13</sup>C NMR (125 MHz, CDCl<sub>3</sub>) δ 167.5, 136.8, 134.1, 133.2, 131.6, 129.0, 128.7, 128.5, 127.0, 43.2.

#### N-(2,4-dichlorobenzyl)benzamide (**5ag**)<sup>5</sup>

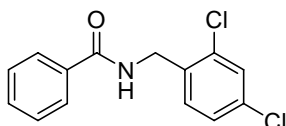

1) **1a** (103 mg, 1 mmol), **2b** (96 mg, 1.1 mmol), [Cp\*IrCl<sub>2</sub>]<sub>2</sub> (8 mg, 0.01 mol, 1 mol%), toluene (1 ml);  
2) **3g** (230 mg, 1.3 mmol), Cs<sub>2</sub>CO<sub>3</sub> (65 mg, 0.2 equiv.).

**5ag**, grey solid, 233 mg, 83% yield.

mp 93-94 °C (lit.<sup>5</sup> mp 90-91 °C); <sup>1</sup>H NMR (500 MHz, CDCl<sub>3</sub>) δ 7.78 (d, *J* = 7.5 Hz, 2H, ArH), 7.51 (t, *J* = 7.4 Hz, 1H, ArH), 7.45-7.40 (m, 4H, ArH), 7.23 (dd, *J* = 8.3 Hz and 2.0 Hz, 1H, ArH), 6.62 (br s, 1H,

NH), 4.69 (d,  $J = 6.1$  Hz, 2H, CH<sub>2</sub>); <sup>13</sup>C NMR (125 MHz, CDCl<sub>3</sub>)  $\delta$  167.5, 134.2, 134.1, 133.90, 133.87, 131.7, 130.8, 129.2, 128.5, 127.2, 126.9, 41.3.

#### N-(4-bromobenzyl)benzamide (**5ah**)<sup>5</sup>

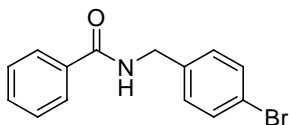

1) **1a** (103 mg, 1 mmol), **2b** (96 mg, 1.1 mmol), [Cp\*IrCl<sub>2</sub>]<sub>2</sub> (8 mg, 0.01 mol, 1 mol%), toluene (1 ml);  
2) **3h** (243 mg, 1.3 mmol), Cs<sub>2</sub>CO<sub>3</sub> (65 mg, 0.2 equiv.).

**5ah**, creamy white solid, 232 mg, 80% yield.

mp 134-135 °C (lit.<sup>5</sup> mp 134-135 °C); <sup>1</sup>H NMR (500 MHz, CDCl<sub>3</sub>)  $\delta$  7.79 (d,  $J = 7.5$  Hz, 2H, ArH), 7.53-7.42 (m, 5H, ArH), 7.24 (d,  $J = 7.9$  Hz, 2H, ArH), 6.47 (br s, 1H, NH), 4.60 (d,  $J = 5.7$  Hz, 2H, CH<sub>2</sub>); <sup>13</sup>C NMR (125 MHz, CDCl<sub>3</sub>)  $\delta$  167.5, 137.3, 134.0, 131.7, 131.6, 129.4, 128.5, 126.9, 121.2, 43.3.

#### N-(4-(trifluoromethyl)benzyl)benzamide (**5ai**)<sup>7</sup>

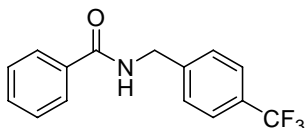

1) **1a** (103 mg, 1 mmol), **2b** (96 mg, 1.1 mmol), [Cp\*IrCl<sub>2</sub>]<sub>2</sub> (8 mg, 0.01 mol, 1 mol%), toluene (1 ml);  
2) **3i** (229 mg, 1.3 mmol), Cs<sub>2</sub>CO<sub>3</sub> (65 mg, 0.2 equiv.).

**5ai**, white solid, 229 mg, 82% yield.

mp 140-141 °C; <sup>1</sup>H NMR (500 MHz, CDCl<sub>3</sub>)  $\delta$  7.80 (d,  $J = 6.4$  Hz, 2H, ArH), 7.61-7.45 (m, 7H, ArH), 6.57 (br s, 1H, NH), 4.71 (s, 2H, CH<sub>2</sub>); <sup>13</sup>C NMR (125 MHz, CDCl<sub>3</sub>)  $\delta$  167.6, 142.4, 134.0, 131.8, 129.8 (q,  $J_{C-F} = 32.5$  Hz), 128.6, 127.9, 127.0, 125.6 (d,  $J_{C-F} = 3.5$  Hz), 124.1 (q,  $J_{C-F} = 270.5$  Hz), 43.5.

#### N-(4-(trifluoromethoxy)benzyl)benzamide (**5aj**)<sup>5</sup>

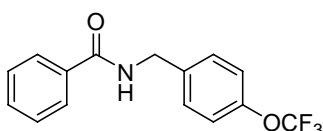

1) **1a** (103 mg, 1 mmol), **2b** (96 mg, 1.1 mmol), [Cp\*IrCl<sub>2</sub>]<sub>2</sub> (8 mg, 0.01 mol, 1 mol%), toluene (1 ml);  
2) **3j** (250 mg, 1.3 mmol), Cs<sub>2</sub>CO<sub>3</sub> (65 mg, 0.2 equiv.).

**5aj**, earthy yellow solid, 248 mg, 84% yield.

mp 134-135 °C (lit.<sup>5</sup> mp 129-130 °C); <sup>1</sup>H NMR (500 MHz, CDCl<sub>3</sub>)  $\delta$  7.80 (d,  $J = 7.3$  Hz, 2H, ArH), 7.52 (t,  $J = 7.4$  Hz, 1H, ArH), 7.44 (t,  $J = 7.5$  Hz, 2H, ArH), 7.38 (d,  $J = 8.4$  Hz, 2H, ArH), 7.19 (d,  $J = 8.2$  Hz, 2H, ArH), 6.49 (br s, 1H, NH), 4.65 (d,  $J = 5.7$  Hz, 2H, CH<sub>2</sub>); <sup>13</sup>C NMR (125 MHz, CDCl<sub>3</sub>)  $\delta$  167.6, 148.5, 137.1, 134.1, 131.6, 129.1, 128.5, 127.0, 121.1, 120.4 (q,  $J_{C-F} = 255.4$  Hz), 43.1.

#### N-(naphthalen-2-ylmethyl)benzamide (**5ak**)<sup>5</sup>

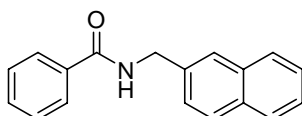

1) **1a** (103 mg, 1 mmol), **2b** (96 mg, 1.1 mmol), [Cp\*IrCl<sub>2</sub>]<sub>2</sub> (8 mg, 0.01 mol, 1 mol%), toluene (1 ml);  
2) **3k** (237 mg, 1.5 mmol), Cs<sub>2</sub>CO<sub>3</sub> (65 mg, 0.2 equiv.).

**5ak**, white solid, 214 mg, 82% yield.

mp 141-142 °C (lit.<sup>5</sup> mp 142-143 °C); <sup>1</sup>H NMR (500 MHz, CDCl<sub>3</sub>) δ 7.84-7.79 (m, 6H, ArH), 7.52-7.42 (m, 6H, ArH), 6.51 (br s, 1H, NH), 4.81 (d, *J* = 5.5 Hz, 2H, CH<sub>2</sub>); <sup>13</sup>C NMR (125 MHz, CDCl<sub>3</sub>) δ 167.4, 135.6, 134.3, 133.3, 132.7, 131.5, 128.5, 127.69, 127.65, 127.0, 126.5, 126.3, 125.9, 44.2.

#### N-(furan-2-ylmethyl)benzamide (**5al**)<sup>8</sup>

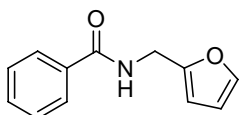

1) **1a** (103 mg, 1 mmol), **2b** (96 mg, 1.1 mmol), [Cp\*IrCl<sub>2</sub>]<sub>2</sub> (8 mg, 0.01 mol, 1 mol%), toluene (1 ml);  
2) **3l** (128 mg, 1.3 mmol), Cs<sub>2</sub>CO<sub>3</sub> (65 mg, 0.2 equiv.).

**5al**, light yellow solid, 161 mg, 80% yield.

mp 98-99 °C (lit.<sup>8</sup> mp 99-100 °C); <sup>1</sup>H NMR (500 MHz, CDCl<sub>3</sub>) δ 7.79 (d, *J* = 8.5 Hz, 2H, ArH), 7.50 (t, *J* = 7.5 Hz, 1H, ArH), 7.43 (t, *J* = 7.5 Hz, 2H, ArH), 7.38 (s, 1H, ArH), 6.48 (br s, 1H, NH), 6.33 (d, *J* = 18.5 Hz, 2H, ArH), 4.64 (d, *J* = 6.0 Hz, 2H, CH<sub>2</sub>); <sup>13</sup>C NMR (125 MHz, CDCl<sub>3</sub>) δ 167.3, 151.1, 142.2, 134.1, 131.5, 128.5, 127.0, 110.5, 107.6, 36.9.

#### N-(thiophen-2-ylmethyl)benzamide (**5am**)<sup>3</sup>

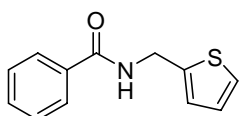

1) **1a** (103 mg, 1 mmol), **2b** (96 mg, 1.1 mmol), [Cp\*IrCl<sub>2</sub>]<sub>2</sub> (8 mg, 0.01 mol, 1 mol%), toluene (1 ml);  
2) **3m** (148 mg, 1.3 mmol), Cs<sub>2</sub>CO<sub>3</sub> (65 mg, 0.2 equiv.).

**5am**, brown solid, 185 mg, 85% yield.

mp 117-118 °C (lit.<sup>3</sup> mp 120 °C); <sup>1</sup>H NMR (500 MHz, CDCl<sub>3</sub>) δ 7.78 (d, *J* = 7.7 Hz, 2H, ArH), 7.50 (t, *J* = 7.3 Hz, 1H, ArH), 7.43 (t, *J* = 7.5 Hz, 2H, ArH), 7.26-7.25 (m, 1H, ArH), 7.05 (d, *J* = 2.95 Hz, 1H, ArH), 6.98 (t, *J* = 4.2 Hz, 1H, ArH), 6.46 (br s, 1H, NH), 4.82 (d, *J* = 5.6 Hz, 2H, CH<sub>2</sub>); <sup>13</sup>C NMR (125 MHz, CDCl<sub>3</sub>) δ 167.2, 140.8, 134.1, 131.5, 128.5, 127.0, 126.8, 126.1, 125.2, 38.7.

#### N-butylbenzamide (**5an**)<sup>9</sup>

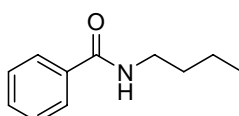

1) **1a** (103 mg, 1 mmol), **2b** (96 mg, 1.1 mmol), [Cp\*IrCl<sub>2</sub>]<sub>2</sub> (8 mg, 0.01 mol, 1 mol%), toluene (1 ml);  
2) **3n** (148 mg, 2 mmol), KO<sup>t</sup>Bu (22 mg, 0.2 equiv.).

**5an**, white solid, 139 mg, 78% yield.

mp 37-38 °C (lit.<sup>9</sup> mp 39-41 °C); <sup>1</sup>H NMR (500 MHz, CDCl<sub>3</sub>) δ 7.75 (d, *J* = 7.5 Hz, 2H, ArH), 7.49 (t, *J* = 7.25 Hz, 1H, ArH), 7.44-7.41 (m, 2H, ArH), 6.10 (br s, 1H, NH), 3.46 (q, *J* = 6.7 Hz, 2H, NCH<sub>2</sub>), 1.64-1.57 (m, 2H, CH<sub>2</sub>), 1.46-1.39 (m, 2H, CH<sub>2</sub>), 0.96 (t, *J* = 7.3 Hz, 3H, CH<sub>3</sub>); <sup>13</sup>C NMR (125 MHz,

CDCl<sub>3</sub>)  $\delta$  167.5, 134.8, 131.1, 128.4, 126.8, 39.7, 31.6, 20.1, 13.7.

### N-hexylbenzamide (5ao)<sup>10</sup>

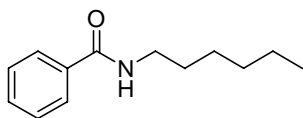

1) **1a** (103 mg, 1 mmol), **2b** (96 mg, 1.1 mmol), [Cp\*IrCl<sub>2</sub>]<sub>2</sub> (8 mg, 0.01 mol, 1 mol%), toluene (1 ml);  
2) **3o** (204 mg, 2 mmol), KOtBu (22 mg, 0.2 equiv.).

**5ao**, white solid, 168 mg, 82% yield.

mp 41-42 °C (lit.<sup>10</sup> mp 42-44 °C); <sup>1</sup>H NMR (500 MHz, CDCl<sub>3</sub>)  $\delta$  7.76 (d, *J* = 7.0 Hz, 2H, ArH), 7.50-7.47 (m, 1H, ArH), 7.42 (t, *J* = 7.5 Hz, 2H, ArH), 6.15 (br s, 1H, NH), 3.45 (q, *J* = 6.8 Hz, 2H, NCH<sub>2</sub>), 1.67-1.58 (m, 2H, CH<sub>2</sub>), 1.41-1.30 (m, 6H, 3xCH<sub>2</sub>), 0.90 (t, *J* = 7.1 Hz, 3H, CH<sub>3</sub>); <sup>13</sup>C NMR (125 MHz, CDCl<sub>3</sub>)  $\delta$  167.5, 134.8, 131.2, 128.4, 126.8, 40.1, 31.4, 29.6, 26.6, 22.5, 14.0.

### N-(cyclohexylmethyl)benzamide (5ap)<sup>5</sup>

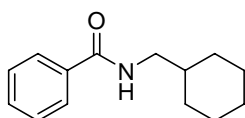

1) **1a** (103 mg, 1 mmol), **2b** (96 mg, 1.1 mmol), [Cp\*IrCl<sub>2</sub>]<sub>2</sub> (8 mg, 0.01 mol, 1 mol%), toluene (1 ml);  
2) **3p** (228 mg, 2 mmol), KOtBu (22 mg, 0.2 equiv.).

**5ap**, light grey solid, 185 mg, 85% yield.

mp 103-104 °C (lit.<sup>5</sup> mp 102-103 °C); <sup>1</sup>H NMR (500 MHz, CDCl<sub>3</sub>)  $\delta$  7.76 (d, *J* = 7.3 Hz, 2H, ArH), 7.49 (t, *J* = 7.3 Hz, 1H, ArH), 7.43 (t, *J* = 7.5 Hz, 2H, ArH), 6.18 (br s, 1H, NH), 3.45 (t, *J* = 6.4 Hz, 2H, NCH<sub>2</sub>), 1.80-1.73 (m, 4H, 2xCH<sub>2</sub>), 1.69-1.65 (m, 2H, CH<sub>2</sub>), 1.63-1.55 (m, 1H, CH), 1.29-1.14 (m, 2H, CH<sub>2</sub>), 1.00 (q, *J* = 11.8 Hz, 2H, CH<sub>2</sub>); <sup>13</sup>C NMR (125 MHz, CDCl<sub>3</sub>)  $\delta$  167.6, 134.9, 131.2, 128.4, 126.8, 46.2, 38.0, 30.9, 26.3, 25.8.

### N-benzyl-4-methylbenzamide (5ba)<sup>1</sup>

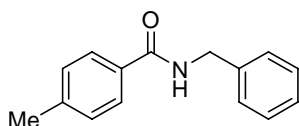

1) **1b** (117 mg, 1 mmol), **2b** (113 mg, 1.3 mmol), [Cp\*IrCl<sub>2</sub>]<sub>2</sub> (8 mg, 0.01 mol, 1 mol%), toluene (1 ml);  
2) **3a** (162 mg, 1.5 mmol), Cs<sub>2</sub>CO<sub>3</sub> (65 mg, 0.2 equiv.).

**5ba**, light yellow solid, 183 mg, 81% yield.

mp 132-133 °C (lit.<sup>1</sup> mp 133 °C); <sup>1</sup>H NMR (500 MHz, CDCl<sub>3</sub>)  $\delta$  7.69 (d, *J* = 8.1 Hz, 2H, ArH), 7.36-7.28 (m, 5H, ArH), 7.23 (d, *J* = 8.0 Hz, 2H, ArH), 6.37 (br s, 1H, NH), 4.64 (d, *J* = 5.7 Hz, 2H, CH<sub>2</sub>), 2.39 (s, 3H, CH<sub>3</sub>); <sup>13</sup>C NMR (125 MHz, CDCl<sub>3</sub>)  $\delta$  167.3, 141.9, 138.3, 131.5, 129.2, 128.7, 127.9, 127.5, 126.9, 44.0, 21.4.

### N-benzyl-4-methoxybenzamide (5ca)<sup>11</sup>

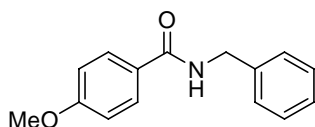

1) **1c** (133 mg, 1 mmol), **2b** (96 mg, 1.1 mmol), [Cp\*IrCl<sub>2</sub>]<sub>2</sub> (8 mg, 0.01 mol, 1 mol%), toluene (1 ml);  
 2) **3a** (140 mg, 1.3 mmol), Cs<sub>2</sub>CO<sub>3</sub> (65 mg, 0.2 equiv.).

**5ca**, light yellow solid, 183 mg, 76% yield.

mp 121-122 °C (lit.<sup>11</sup> mp 129-130 °C); <sup>1</sup>H NMR (500 MHz, CDCl<sub>3</sub>) δ 7.76 (d, *J* = 8.9 Hz, 2H, ArH), 7.35 (d, *J* = 4.35 Hz, 4H, ArH), 7.32-7.28 (m, 1H, ArH), 6.92 (d, *J* = 8.9 Hz, 2H, ArH), 6.34 (br s, 1H, NH), 4.64 (d, *J* = 5.7 Hz, 2H, CH<sub>2</sub>), 3.84 (s, 3H, OCH<sub>3</sub>); <sup>13</sup>C NMR (125 MHz, CDCl<sub>3</sub>) δ 166.8, 162.1, 138.4, 128.7, 128.7, 127.8, 127.5, 126.6, 113.7, 55.3, 44.0.

#### N-benzyl-4-fluorobenzamide (**5da**)<sup>12</sup>

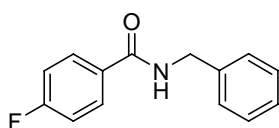

1) **1d** (121 mg, 1 mmol), **2b** (96 mg, 1.1 mmol), [Cp\*IrCl<sub>2</sub>]<sub>2</sub> (8 mg, 0.01 mol, 1 mol%), toluene (1 ml);  
 2) **3a** (140 mg, 1.3 mmol), Cs<sub>2</sub>CO<sub>3</sub> (65 mg, 0.2 equiv.).

**5da**, grey solid, 190 mg, 83% yield.

mp 141-142 °C (lit.<sup>12</sup> mp 143-144 °C); <sup>1</sup>H NMR (500 MHz, CDCl<sub>3</sub>) δ 7.80 (t, *J* = 7.1 Hz, 2H, ArH), 7.37-7.29 (m, 5H, ArH), 7.10 (t, *J* = 8.6 Hz, 2H, ArH), 6.34 (br s, 1H, NH), 4.64 (d, *J* = 5.7 Hz, 2H, CH<sub>2</sub>); <sup>13</sup>C NMR (125 MHz, CDCl<sub>3</sub>) δ 166.4, 164.7 (d, *J*<sub>C-F</sub> = 250.2 Hz), 138.1, 130.5, 129.3 (d, *J*<sub>C-F</sub> = 8.8 Hz), 128.7, 127.8, 127.6, 115.5 (d, *J*<sub>C-F</sub> = 21.7 Hz), 44.1.

#### N-benzyl-4-chlorobenzamide (**5ea**)<sup>13</sup>

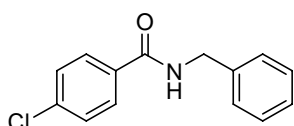

1) **1e** (137 mg, 1 mmol), **2b** (96 mg, 1.1 mmol), [Cp\*IrCl<sub>2</sub>]<sub>2</sub> (8 mg, 0.01 mol, 1 mol%), toluene (1 ml);  
 2) **3a** (140 mg, 1.3 mmol), Cs<sub>2</sub>CO<sub>3</sub> (65 mg, 0.2 equiv.).

**5ea**, maize yellow solid, 199 mg, 81% yield.

mp 162-163 °C (lit.<sup>13</sup> mp 163-166 °C); <sup>1</sup>H NMR (500 MHz, CDCl<sub>3</sub>) δ 7.73 (d, *J* = 8.5 Hz, 2H, ArH), 7.40 (d, *J* = 8.5 Hz, 2H, ArH), 7.36-7.34 (m, 4H, ArH), 7.32-7.28 (m, 1H, ArH), 6.38 (br s, 1H, NH), 4.63 (d, *J* = 5.7 Hz, 2H, CH<sub>2</sub>); <sup>13</sup>C NMR (125 MHz, CDCl<sub>3</sub>) δ 166.4, 137.9, 137.7, 132.7, 128.8, 128.4, 127.8, 127.6, 44.1.

#### N-benzyl-3,4-dichlorobenzamide (**5fa**)<sup>5</sup>

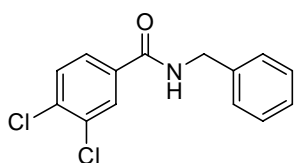

1) **1f** (172 mg, 1 mmol), **2b** (96 mg, 1.1 mmol), [Cp\*IrCl<sub>2</sub>]<sub>2</sub> (8 mg, 0.01 mol, 1 mol%), toluene (1 ml);

2) **3a** (140 mg, 1.3 mmol), Cs<sub>2</sub>CO<sub>3</sub> (65 mg, 0.2 equiv.).

**5fa**, light orange solid, 253 mg, 90% yield.

mp 105-106 °C (lit.<sup>5</sup> mp 111-112 °C); <sup>1</sup>H NMR (500 MHz, CDCl<sub>3</sub>) δ 7.88 (d, *J* = 1.3 Hz, 1H, ArH), 7.60 (d, *J* = 8.5 Hz, 1H, ArH), 7.50 (d, *J* = 8.4 Hz, 1H, ArH), 7.38-7.26 (m, 5H, ArH), 6.36 (br s, 1H, NH), 4.63 (d, *J* = 5.4 Hz, 2H, CH<sub>2</sub>); <sup>13</sup>C NMR (125 MHz, CDCl<sub>3</sub>) δ 165.3, 137.6, 135.9, 134.1, 133.0, 130.6, 129.2, 128.8, 127.8, 127.7, 126.1, 44.2.

#### N-benzyl-3-bromobenzamide (**5ga**)<sup>14</sup>

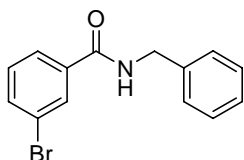

1) **1g** (182 mg, 1 mmol), **2b** (96 mg, 1.1 mmol), [Cp\*IrCl<sub>2</sub>]<sub>2</sub> (8 mg, 0.01 mol, 1 mol%), toluene (1 ml);

2) **3a** (140 mg, 1.3 mmol), Cs<sub>2</sub>CO<sub>3</sub> (65 mg, 0.2 equiv.).

**5ga**, yellow solid, 235 mg, 81% yield.

mp 87-88 °C; <sup>1</sup>H NMR (500 MHz, CDCl<sub>3</sub>) δ 7.93 (s, 1H, ArH), 7.71 (d, *J* = 7.0 Hz, 1H, ArH), 7.63 (d, *J* = 8.0 Hz, 1H, ArH), 7.35-7.26 (m, 6H, ArH), 6.43 (br s, 1H, NH), 4.64 (d, *J* = 5.0 Hz, 2H, CH<sub>2</sub>); <sup>13</sup>C NMR (125 MHz, CDCl<sub>3</sub>) δ 166.1, 137.8, 136.2, 134.3, 130.2, 130.0, 128.7, 127.7, 127.5, 125.6, 122.6, 44.1.

#### N-benzyl-4-(trifluoromethyl)benzamide (**5ha**)<sup>15</sup>

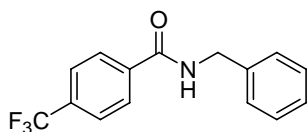

1) **1h** (171 mg, 1 mmol), **2b** (96 mg, 1.1 mmol), [Cp\*IrCl<sub>2</sub>]<sub>2</sub> (8 mg, 0.01 mol, 1 mol%), toluene (1 ml);

2) **3a** (140 mg, 1.3 mmol), Cs<sub>2</sub>CO<sub>3</sub> (65 mg, 0.2 equiv.).

**5ha**, brick-red solid, 224 mg, 80% yield.

mp 169-170 °C (lit.<sup>15</sup> mp 149-151 °C); <sup>1</sup>H NMR (500 MHz, DMSO-d<sub>6</sub>) δ 9.28 (t, *J* = 5.6 Hz, 1H, NH), 8.09 (d, *J* = 8.2 Hz, 2H, ArH), 7.87 (d, *J* = 8.2 Hz, 2H, ArH), 7.34-7.23 (m, 5H, ArH), 4.51 (d, *J* = 5.9 Hz, 2H, CH<sub>2</sub>); <sup>13</sup>C NMR (125 MHz, DMSO-d<sub>6</sub>) δ 165.1, 139.3, 138.1, 131.2 (q, *J*<sub>C-F</sub> = 31.7 Hz), 128.3, 128.2, 127.3, 126.8, 125.3, 123.9 (q, *J*<sub>C-F</sub> = 270.9 Hz), 42.8.

#### N-benzyl-4-(trifluoromethoxy)benzamide (**5ia**)<sup>5</sup>

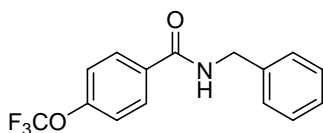

1) **1i** (187 mg, 1 mmol), **2b** (96 mg, 1.1 mmol), [Cp\*IrCl<sub>2</sub>]<sub>2</sub> (8 mg, 0.01 mol, 1 mol%), toluene (1 ml);

2) **3a** (140 mg, 1.3 mmol), Cs<sub>2</sub>CO<sub>3</sub> (65 mg, 0.2 equiv.).

**5ia**, field grey solid, 242 mg, 82% yield.

mp 136-137 °C (lit.<sup>5</sup> mp 139-140 °C); <sup>1</sup>H NMR (500 MHz, CDCl<sub>3</sub>) δ 7.83 (d, *J* = 8.7 Hz, 2H, ArH), 7.38-7.25 (m, 7H, ArH), 6.40 (br s, 1H, NH), 4.64 (d, *J* = 5.7 Hz, 2H, CH<sub>2</sub>); <sup>13</sup>C NMR (125 MHz,



CDCl<sub>3</sub>)  $\delta$  166.1, 151.5, 137.9, 132.8, 128.9, 128.8, 127.8, 127.7, 120.6, 120.3 (q,  $J_{C-F}$  = 256.7 Hz), 44.2.

### N-benzylfuran-2-carboxamide (**5ja**)<sup>16</sup>

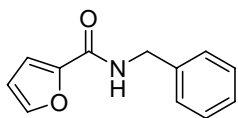

- 1) **1j** (93 mg, 1 mmol), **2b** (96 mg, 1.1 mmol), [Cp\*IrCl<sub>2</sub>]<sub>2</sub> (8 mg, 0.01 mol, 1 mol%), toluene (1 ml);  
2) **3a** (140 mg, 1.3 mmol), Cs<sub>2</sub>CO<sub>3</sub> (65 mg, 0.2 equiv.).

**5ja**, maroon solid, 169 mg, 84% yield.

mp 105-106 °C (lit.<sup>16</sup> 112-113 °C); <sup>1</sup>H NMR (500 MHz, CDCl<sub>3</sub>)  $\delta$  7.41 (s, 1H, ArH), 7.35-7.26 (m, 5H, ArH), 7.15 (d,  $J$  = 3.5 Hz, 1H, ArH), 6.66 (br s, 1H, NH), 6.50 (dd,  $J$  = 3.5 Hz and 1.8 Hz, 1H, ArH), 4.62 (d,  $J$  = 5.9 Hz, 2H, CH<sub>2</sub>); <sup>13</sup>C NMR (125 MHz, CDCl<sub>3</sub>)  $\delta$  158.2, 147.8, 143.8, 138.0, 128.7, 127.8, 127.5, 114.3, 112.1, 43.1.

### N-benzylthiophene-2-carboxamide (**5ka**)<sup>1</sup>

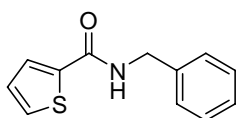

- 1) **1k** (109 mg, 1 mmol), **2b** (96 mg, 1.1 mmol), [Cp\*IrCl<sub>2</sub>]<sub>2</sub> (8 mg, 0.01 mol, 1 mol%), toluene (1 ml);  
2) **3a** (140 mg, 1.3 mmol), Cs<sub>2</sub>CO<sub>3</sub> (65 mg, 0.2 equiv.).

**5ka**, grey solid, 187 mg, 86% yield.

mp 114-115 °C (lit.<sup>1</sup> mp 119.5-120.5 °C); <sup>1</sup>H NMR (500 MHz, CDCl<sub>3</sub>)  $\delta$  7.50 (d,  $J$  = 3.7 Hz, 1H, ArH), 7.47 (d,  $J$  = 5.1 Hz, 1H, ArH), 7.36-7.28 (m, 5H, ArH), 7.07 (t,  $J$  = 4.4 Hz, 1H, ArH), 6.26 (br s, 1H, NH), 4.63 (d,  $J$  = 5.8 Hz, 2H, CH<sub>2</sub>); <sup>13</sup>C NMR (125 MHz, CDCl<sub>3</sub>)  $\delta$  161.8, 138.8, 138.0, 130.0, 128.7, 128.1, 127.8, 127.6, 127.5, 43.9.

### N-benzyl-2-phenylpropanamide (**5la**)<sup>2</sup>

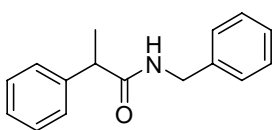

- 1) **1l** (131 mg, 1 mmol), **2b** (113 mg, 1.3 mmol), [Cp\*IrCl<sub>2</sub>]<sub>2</sub> (16 mg, 0.02 mol, 2 mol%), toluene (1 ml);  
2) **3a** (216 mg, 2 mmol), KO<sup>t</sup>Bu (44 mg, 0.4 equiv.).

**5la**, white solid, 182 mg, 76% yield.

mp 76-77 °C (lit.<sup>2</sup> mp 76 °C); <sup>1</sup>H NMR (500 MHz, CDCl<sub>3</sub>)  $\delta$  7.36-7.24 (m, 8H, ArH), 7.15 (d,  $J$  = 7.0 Hz, 2H, ArH), 5.64 (br s, 1H, NH), 4.44-4.35 (m, 2H, CH<sub>2</sub>), 3.60 (q,  $J$  = 7.2 Hz, 1H, CH), 1.57 (d,  $J$  = 7.5 Hz, 3H, CH<sub>3</sub>); <sup>13</sup>C NMR (125 MHz, CDCl<sub>3</sub>)  $\delta$  174.0, 141.2, 138.3, 128.8, 128.5, 127.6, 127.4, 127.2, 127.2, 47.0, 43.4.

### N-benzylbutyramide (**5ma**)<sup>17</sup>

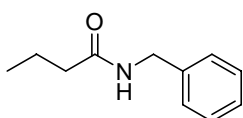

1) **1m** (69 mg, 1 mmol), **2a** (77 mg, 1.3 mmol), [Cp\*IrCl<sub>2</sub>]<sub>2</sub> (16 mg, 0.02 mol, 2 mol%), toluene (1 ml);  
2) **3a** (216 mg, 2 mmol), KO<sup>t</sup>Bu (44 mg, 0.4 equiv.).

**5ma**, white solid, 139 mg, 78% yield.

mp 47-48 °C (lit.<sup>17</sup> mp 41-44 °C); <sup>1</sup>H NMR (500 MHz, CDCl<sub>3</sub>) δ 7.33 (t, *J* = 7.5 Hz, 2H, ArH), 7.28-7.26 (m, 3H, ArH), 5.7 (br s, 1H, NH), 4.44 (d, *J* = 5.5 Hz, 2H, NCH<sub>2</sub>), 2.19 (t, *J* = 7.5 Hz, 2H, CH<sub>2</sub>), 1.73-1.65 (m, 2H, CH<sub>2</sub>), 0.96 (t, *J* = 7.4 Hz, 3H, CH<sub>3</sub>); <sup>13</sup>C NMR (125 MHz, CDCl<sub>3</sub>) δ 172.9, 138.3, 128.6, 127.7, 127.4, 43.4, 38.6, 19.1, 13.7.

## References

- 1 X. Cui, Y. Zhang, F. Shi and Y. Deng, *Chem.-Eur. J.* 2011, **17**, 1021-1028.
- 2 T. Maki, K. Ishihara and H. Yamamoto, *Org. Lett.* 2006, **8**, 1431-1434.
- 3 G. A. Molander and M. A. Hiebel, *Org. Lett.* 2010, **12**, 4876-4879.
- 4 A. Khalafi-Nezhad, H. Foroughi, M. M. Doroodmand and F. Panahi, *J. Mater. Chem.* 2011, **21**, 12842-12851.
- 5 F. Li, P. Qu, J. Ma, X. Zou and C. Sun, *ChemCatChem* 2013, **5**, 2178-2182.
- 6 R. Pricet and R. R. Lindat, *J. Org. Chem.* 1962, **27**, 1066-1067.
- 7 M. D. Hill, M. Movassaghi, *Synthesis* 2008, 823-827.
- 8 J. M. Yeung and E. E. Knaus, *Eur. J. Med. Chem.* 1986, **21**, 181-185.
- 9 T. Gajda, A. Zweirzak, *Synthesis* 1981, 1005-1008.
- 10 T. Ohshima, T. Iwasaki, Y. Maegawa, A. Yoshiyama and K. Mashima, *J. Am. Chem. Soc.* 2008, **130**, 2944-2945.
- 11 B. Roberts, D. Liptrot, L. Alcaraz, T. Luker and M. J. Stocks, *Org. Lett.* 2010, **12**, 4280-4283.
- 12 C. Mamat, A. Flemming, M. Köckerling, J. Steinbach and F. Wuest, *Synthesis* 2009, **19**, 3311-3321.
- 13 E. Petricci, C. Mugnaini, M. Radi, F. Corelli and M. Botta, *J. Org. Chem.* 2004, **69**, 7880-7887.
- 14 T. Suzuki, M. N. A. Khan, H. Sawada, E. Imai, Y. Itoh, K. Yamatsuta, N. Tokuda, J. Takeuchi, T. Seko, H. Nakagawa and N. Miyata, *J. Med. Chem.* 2012, **55**, 5760-5773.
- 15 A. R. Prosser, J. E. Banning, M. Rubina and M. Rubin, *Org. Lett.* 2010, **12**, 3968-3971.
- 16 C. Chen, Y. Zhang and S. H. Hong, *J. Org. Chem.* 2011, **76**, 10005-10010.
- 17 S. Kushner, R. I. Cassell, J. Morton II and J. H. Williams, *J. Org. Chem.* 1951, **16**, 1283-1288.

N-benzylbenzamide  
Proton CDCl<sub>3</sub>

7.798  
7.783  
7.513  
7.498  
7.484  
7.440  
7.424  
7.409  
7.359  
7.351  
7.322  
7.314  
7.305  
7.297  
7.288  
7.279  
7.258  
6.460

4.652  
4.641

0.000

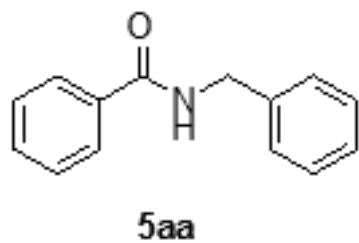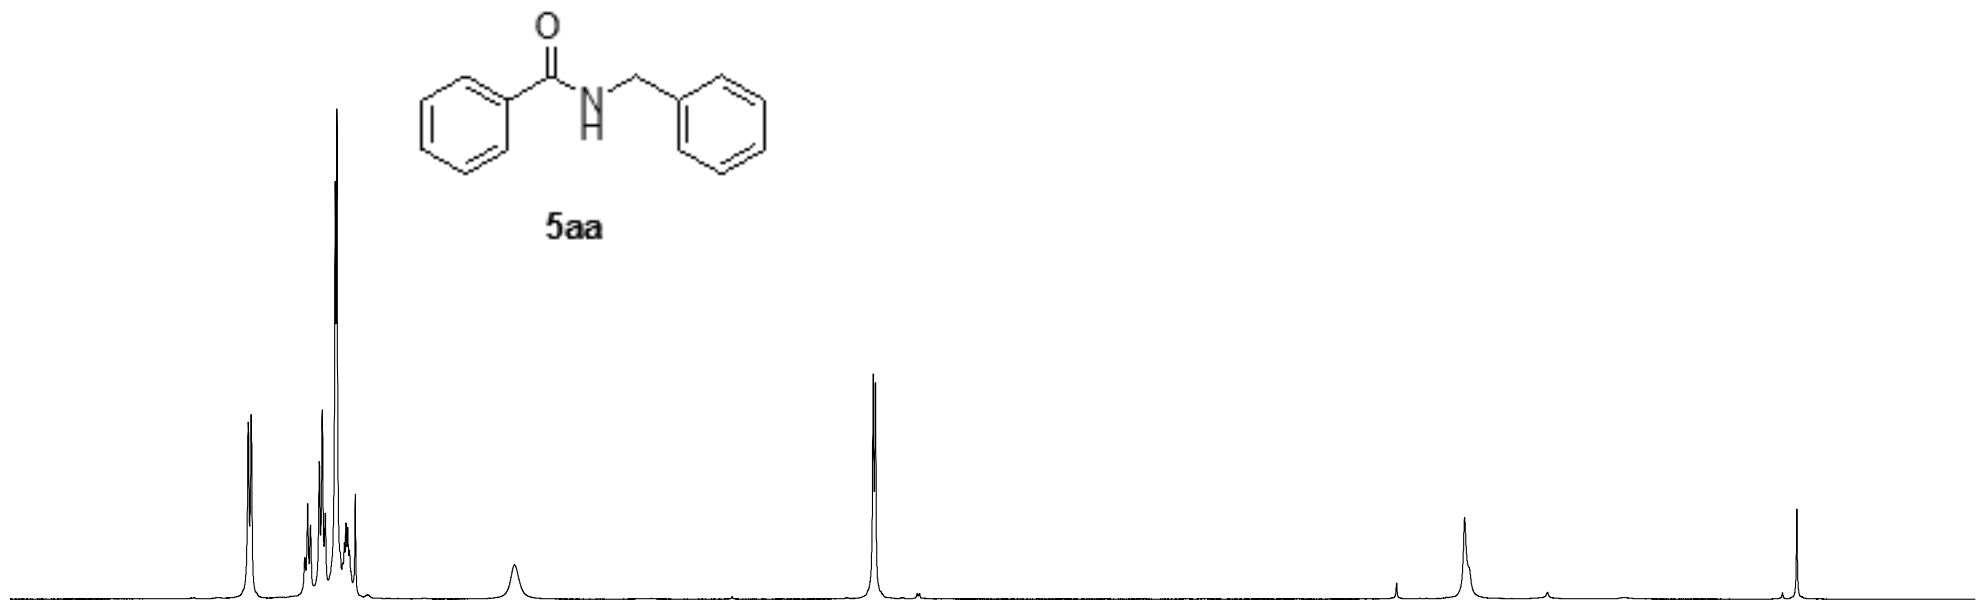

8.5 8.0 7.5 7.0 6.5 6.0 5.5 5.0 4.5 4.0 3.5 3.0 2.5 2.0 1.5 1.0 0.5 0.0 ppm

2.00  
1.00  
2.00  
3.88  
1.10

1.00

2.00

N-benzylbenzamide  
C13CPD CDC13

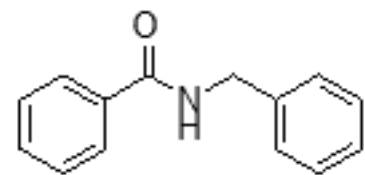

5aa

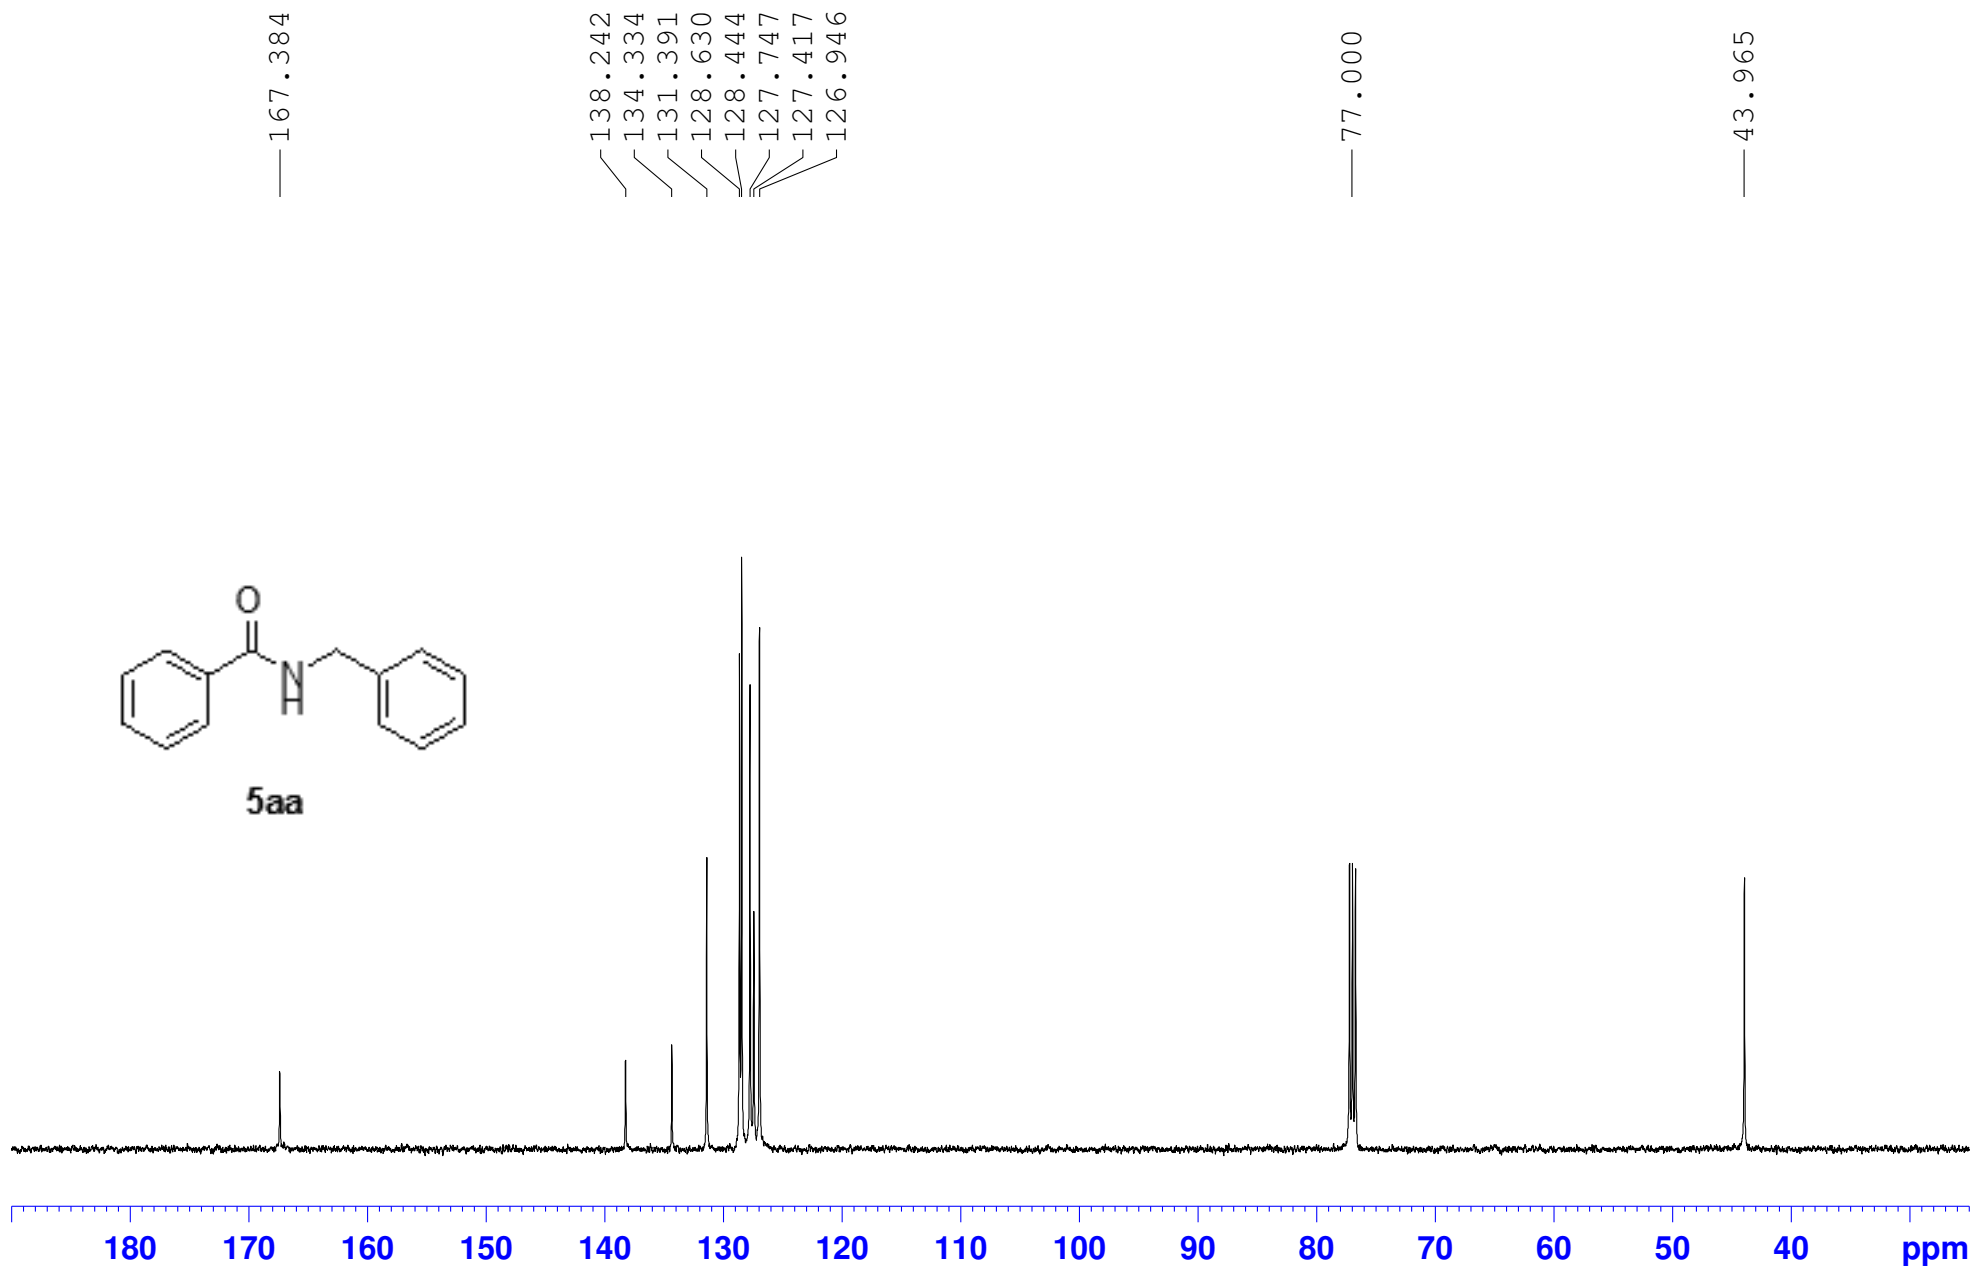

N-(4-methylbenzyl)benzamide  
Proton CDCl<sub>3</sub>

7.786  
7.771  
7.507  
7.492  
7.478  
7.435  
7.420  
7.405  
7.258  
7.242  
7.171  
7.155  
6.362

4.609  
4.598

2.346

0.000

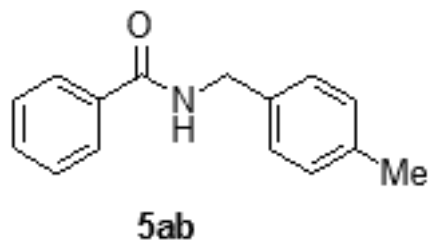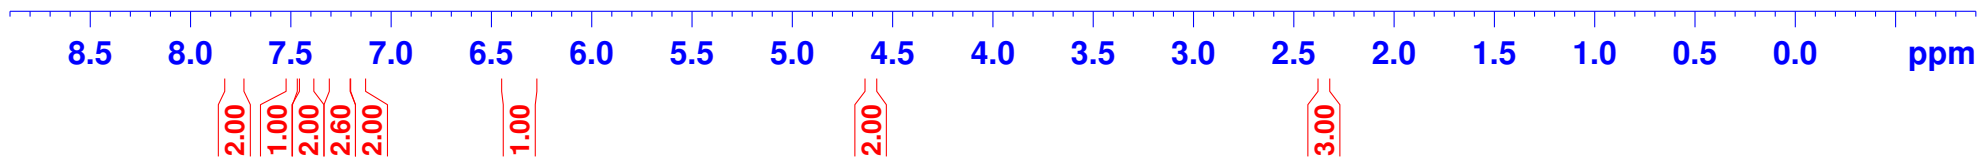

N-(4-methylbenzyl)benzamide  
C13CPD CDC13

— 167.289

137.149  
135.166  
134.412  
131.352  
129.316  
128.432  
127.806  
126.916

— 77.000

— 43.782

— 21.003

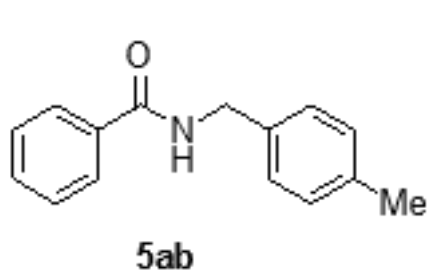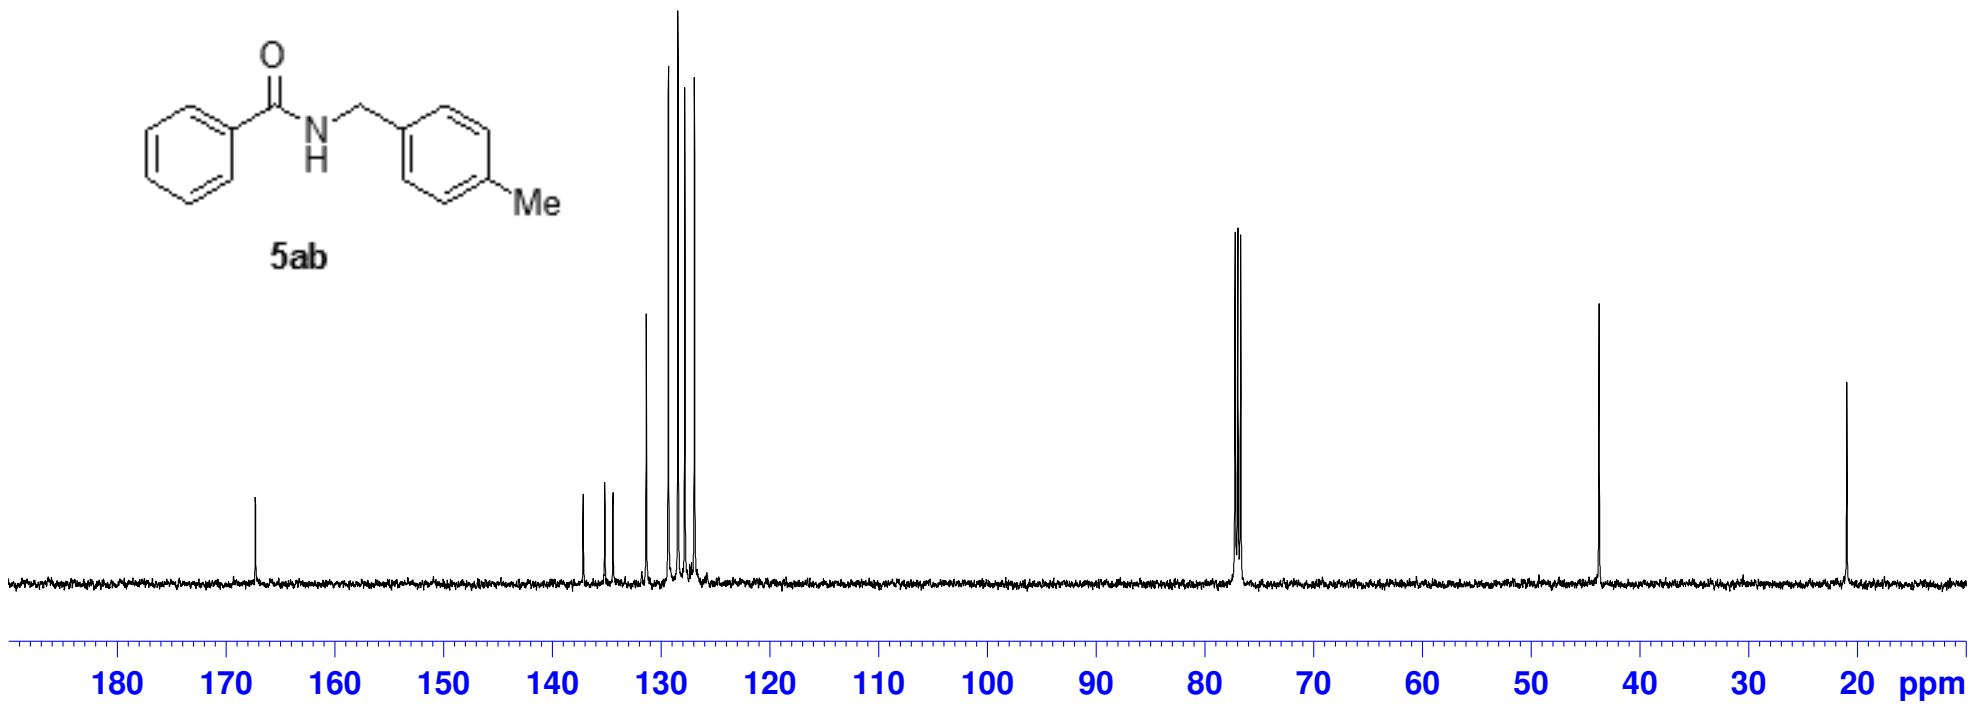

N-(4-methoxybenzyl)benzamide  
Proton CDCl<sub>3</sub>

7.785  
7.771  
7.510  
7.495  
7.481  
7.439  
7.424  
7.409  
7.298  
7.281  
7.260  
6.898  
6.880  
6.322

4.590  
4.579

3.806

0.000

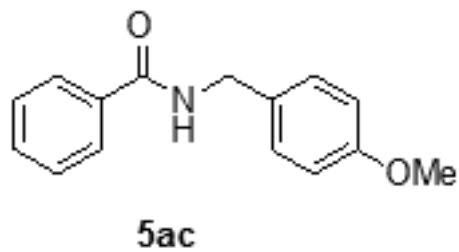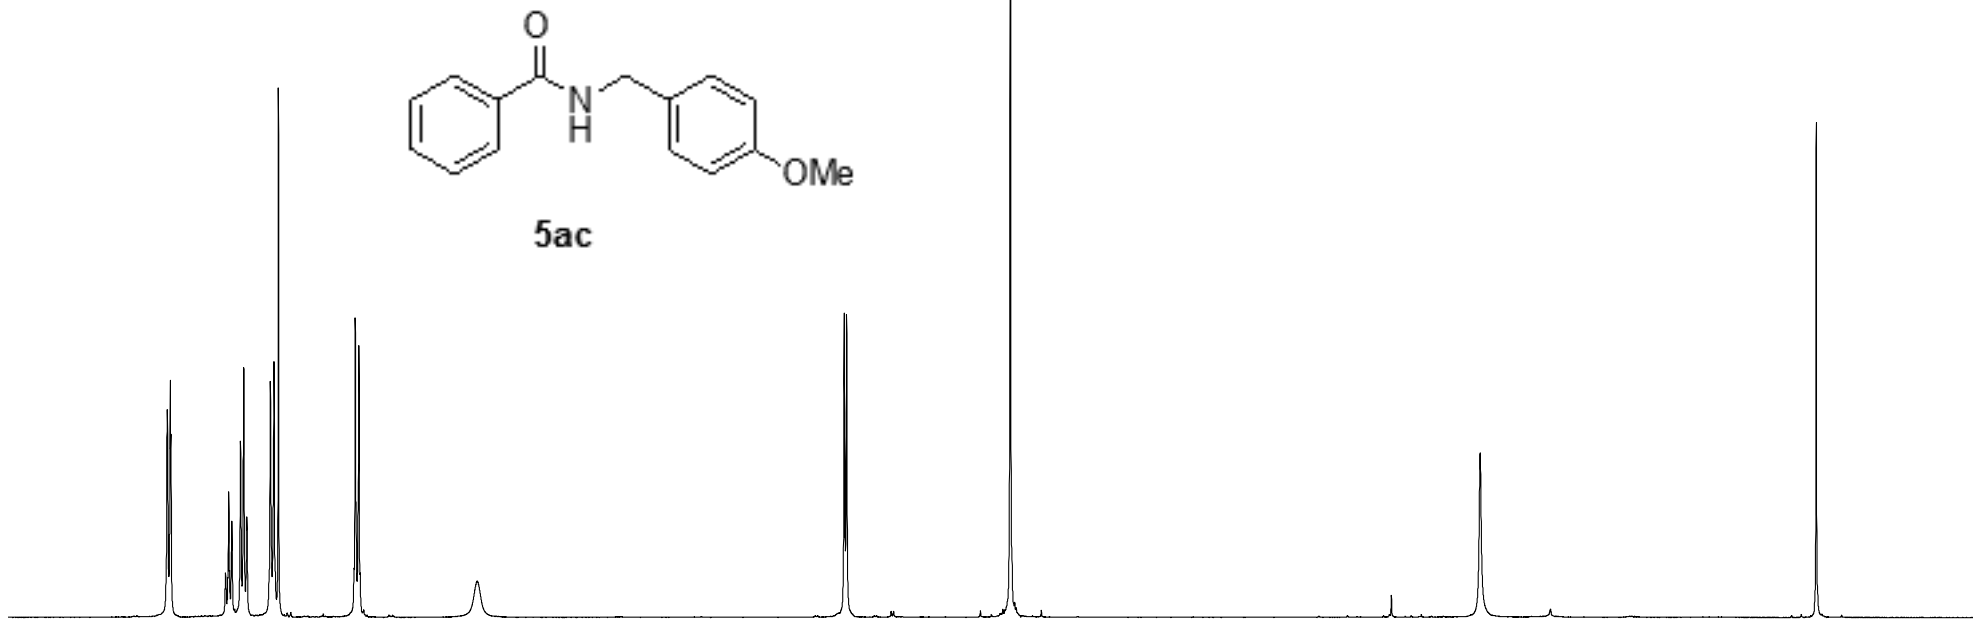

8.0 7.5 7.0 6.5 6.0 5.5 5.0 4.5 4.0 3.5 3.0 2.5 2.0 1.5 1.0 0.5 0.0 ppm

2.00  
1.00  
2.00  
2.00  
2.00  
1.00  
2.00  
3.00

N-(4-methoxybenzyl)benzamide  
C13CPD CDCl3

— 167.261

— 159.035

134.429

131.366

130.317

129.171

128.453

126.917

— 114.087

— 77.000

— 55.233

— 43.511

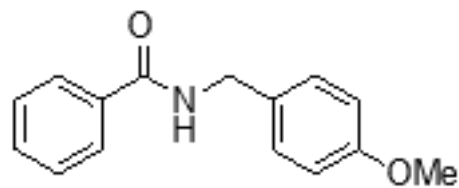

5ac

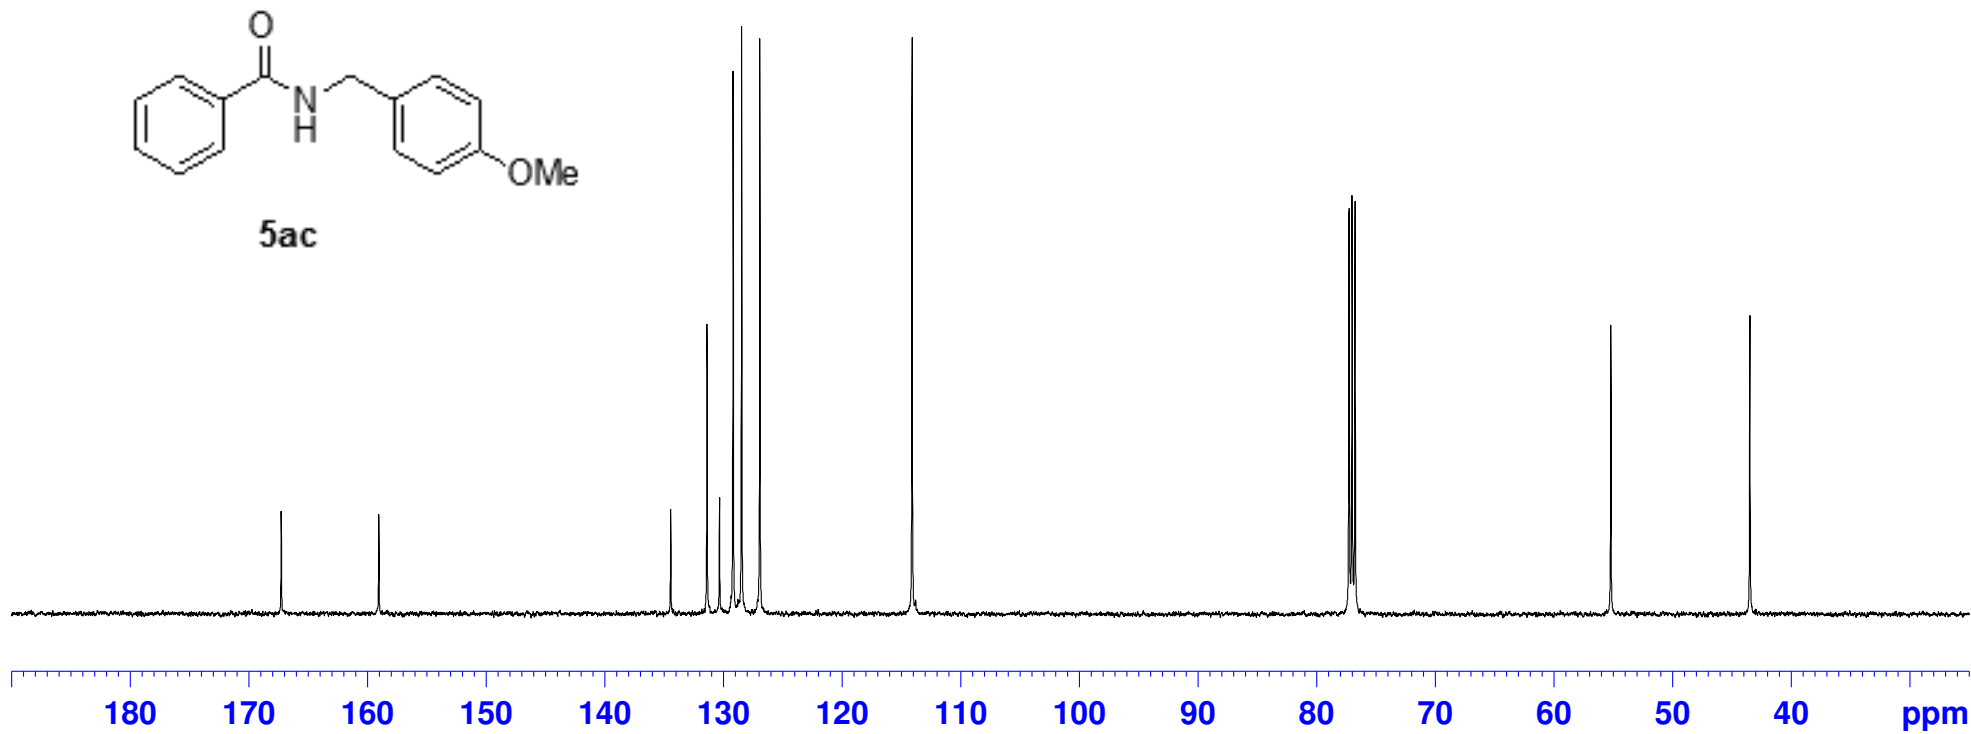



N-(4-fluorobenzyl)benzamide  
Proton CDCl<sub>3</sub>

7.793  
7.778  
7.522  
7.507  
7.492  
7.447  
7.431  
7.417  
7.340  
7.329  
7.324  
7.313  
7.260  
7.049  
7.032  
7.014  
6.441

4.620  
4.609

0.000

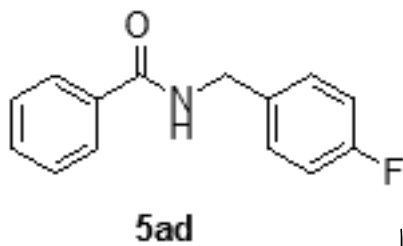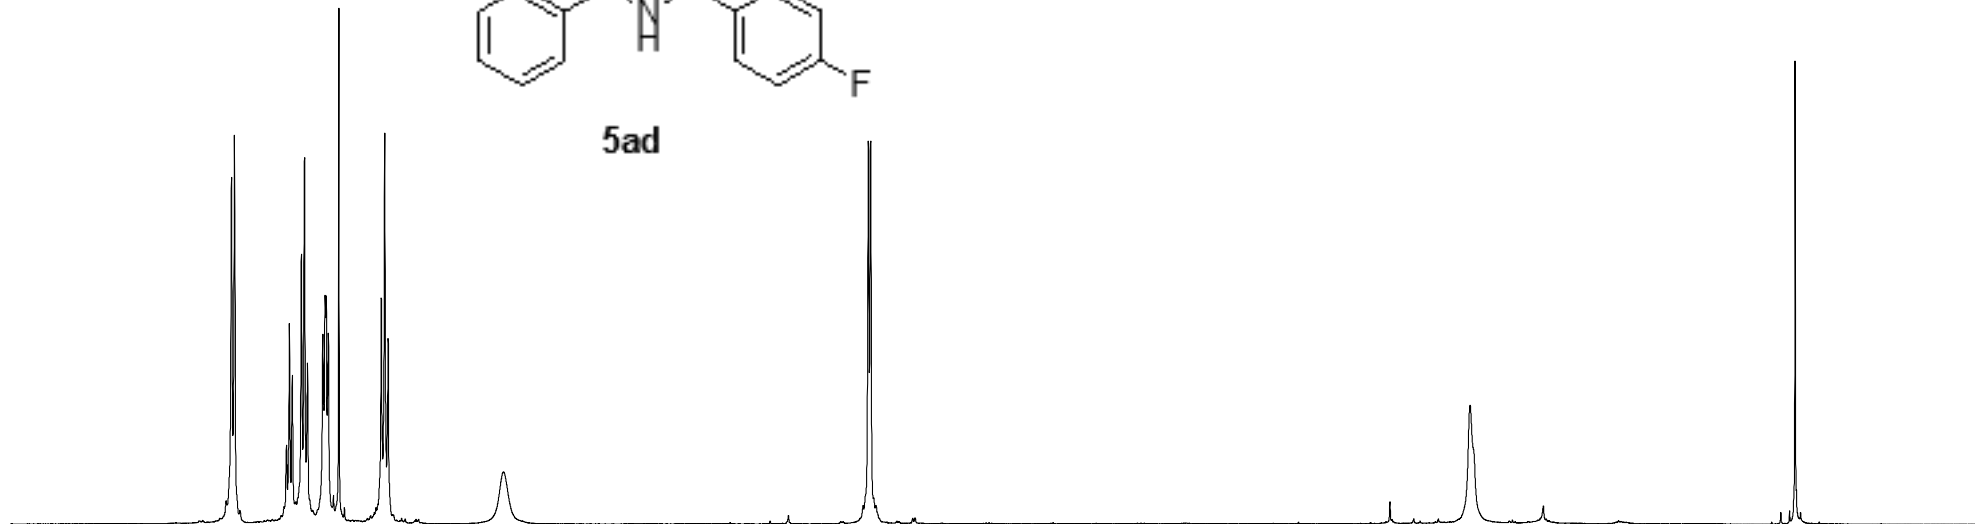

8.5 8.0 7.5 7.0 6.5 6.0 5.5 5.0 4.5 4.0 3.5 3.0 2.5 2.0 1.5 1.0 0.5 0.0 ppm

2.00  
1.00  
2.00  
2.00  
2.00  
1.00  
2.00

N-(4-fluorobenzyl)benzamide  
C13CPD CDC13

— 167.486  
— 163.070  
— 161.118

134.184  
134.098  
131.505  
129.375  
128.477  
126.952

115.495  
115.328

— 77.000

— 43.164

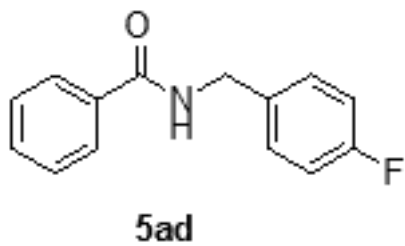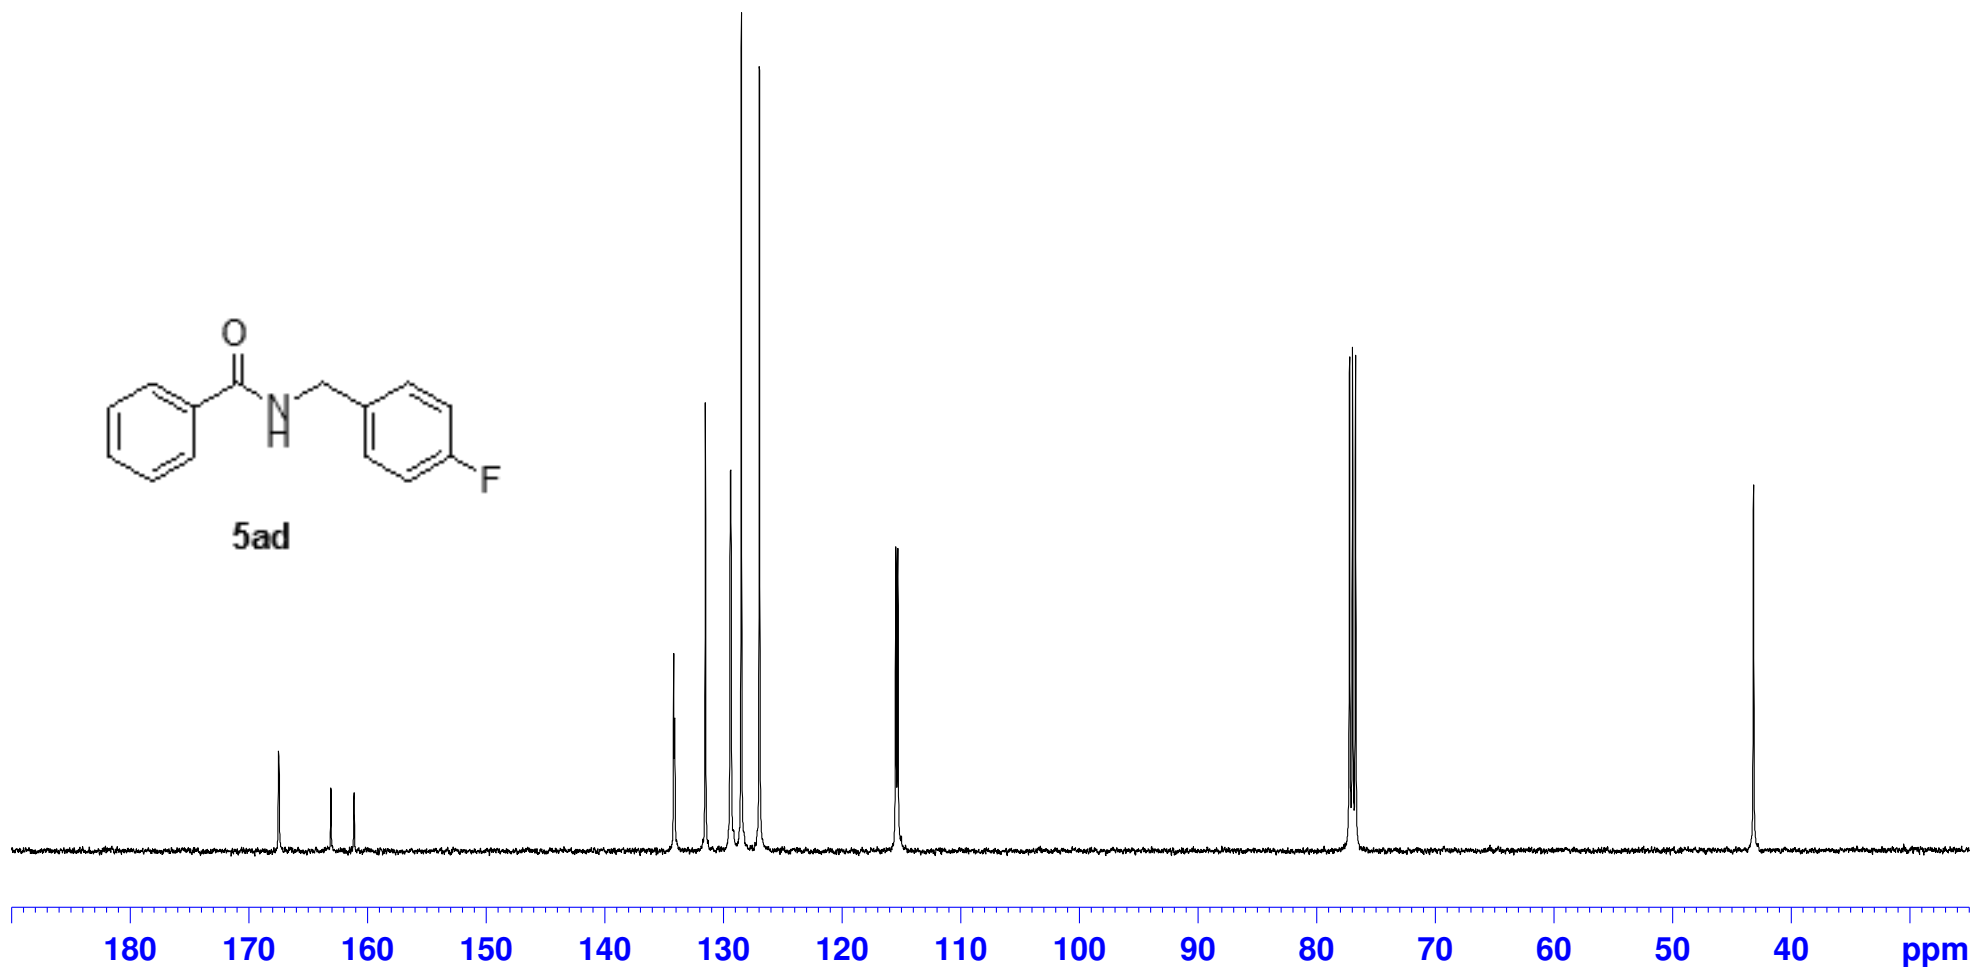

N-(2-chlorobenzyl)benzamide  
Proton CDCl<sub>3</sub>

7.792  
7.777  
7.516  
7.501  
7.485  
7.474  
7.465  
7.445  
7.430  
7.415  
7.399  
7.395  
7.389  
7.381  
7.259  
7.249  
7.241  
6.617

4.743  
4.731

0.000

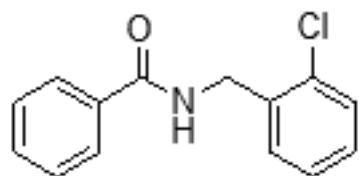

5ae

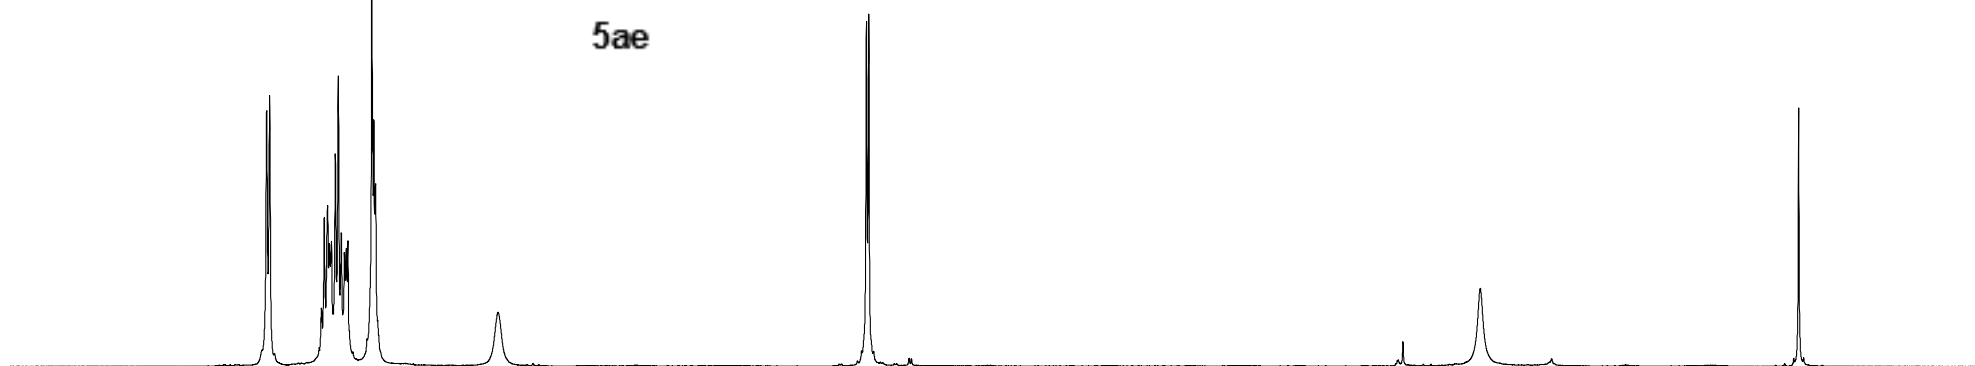

8.5 8.0 7.5 7.0 6.5 6.0 5.5 5.0 4.5 4.0 3.5 3.0 2.5 2.0 1.5 1.0 0.5 0.0 ppm

2.00  
5.01  
2.72  
0.99

2.00

N-(2-chlorobenzyl)benzamide  
C13CPD CDC13

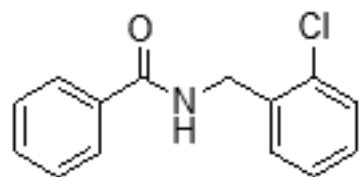

5ae

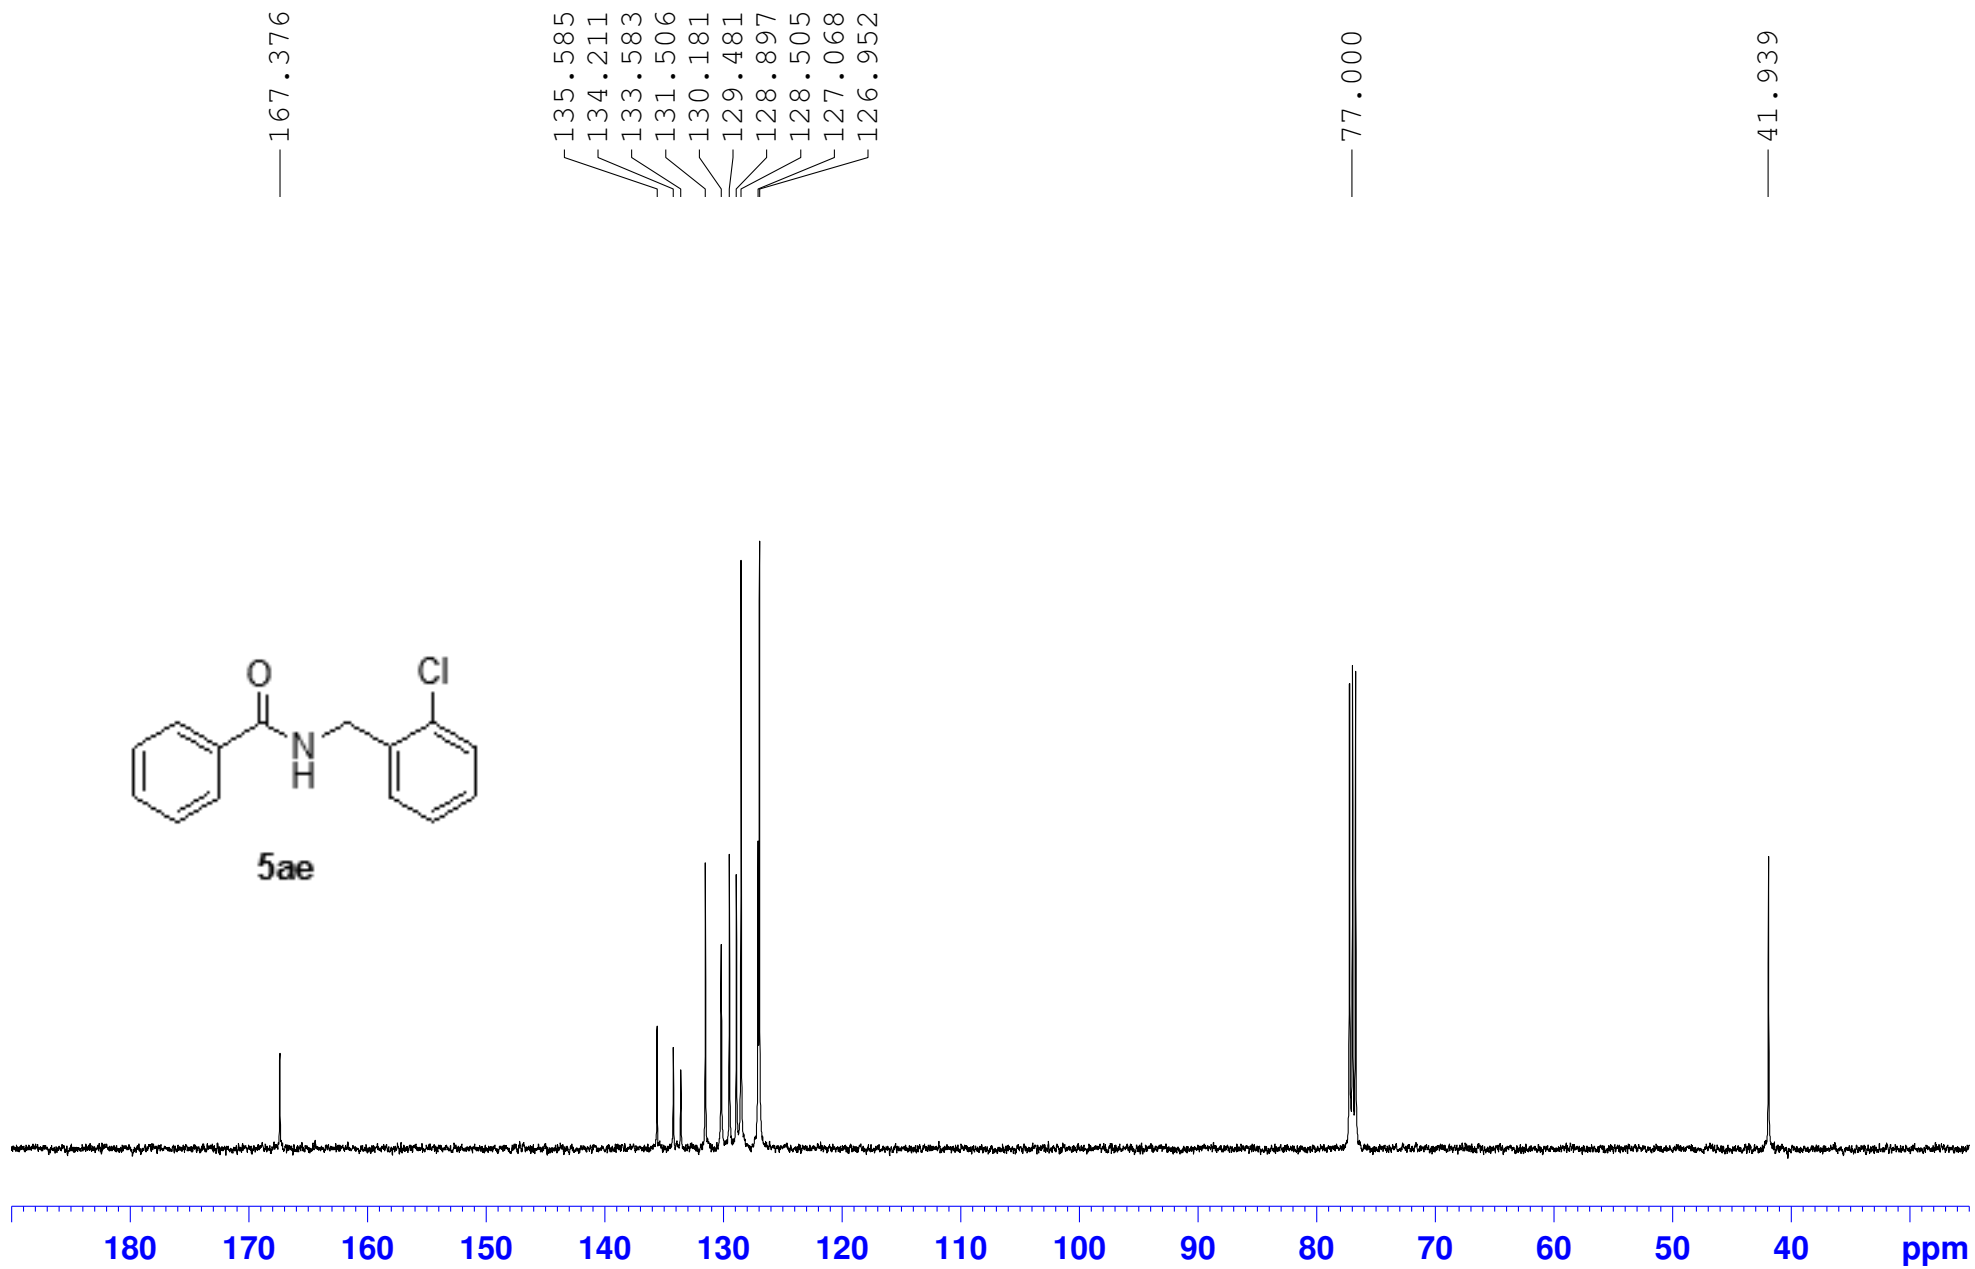

N-(4-chlorobenzyl)benzamide  
Proton CDCl<sub>3</sub>

7.793  
7.778  
7.526  
7.511  
7.497  
7.449  
7.434  
7.419  
7.324  
7.309  
7.295  
7.278  
7.260  
6.457

4.620  
4.609

0.000

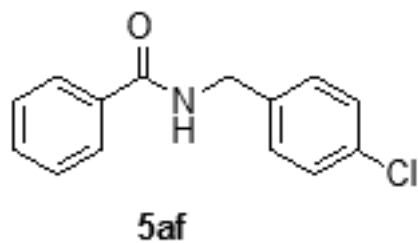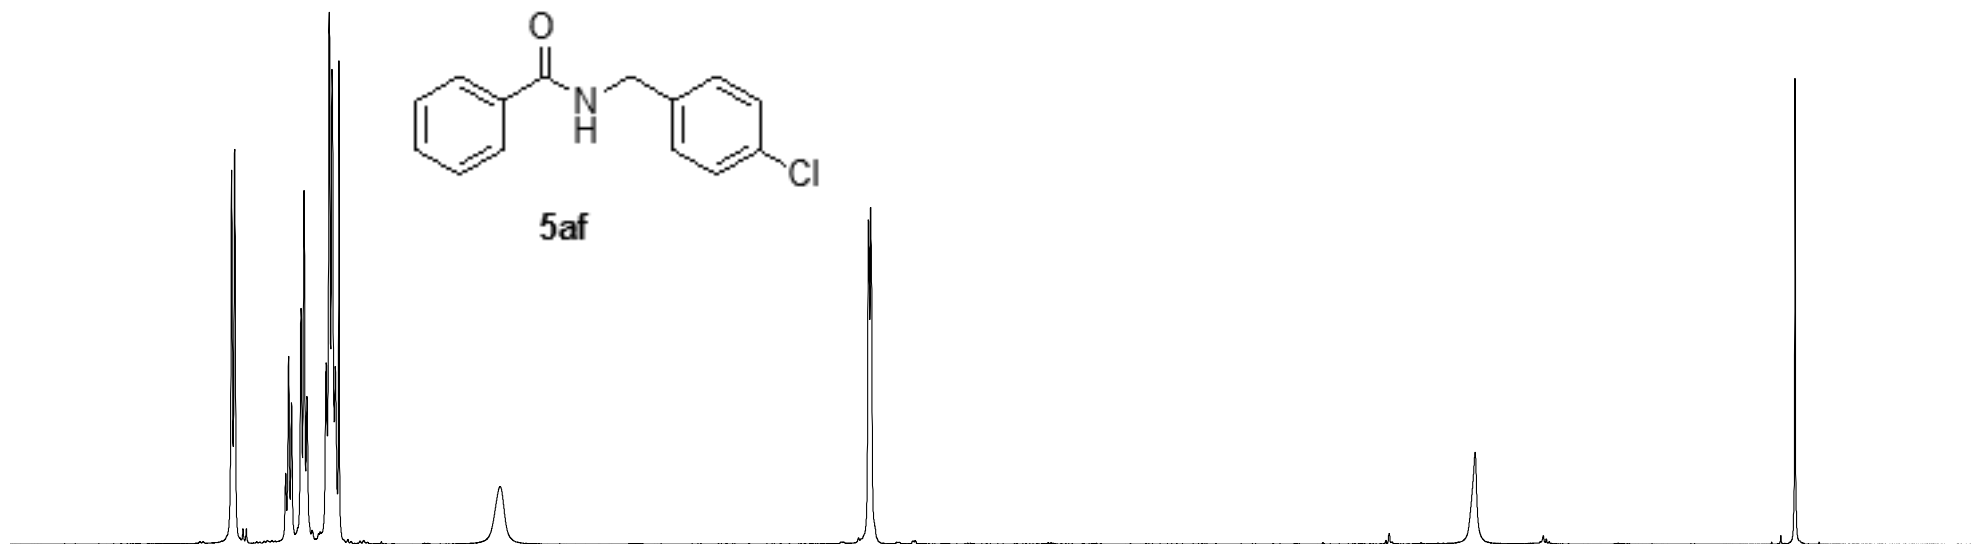

8.5 8.0 7.5 7.0 6.5 6.0 5.5 5.0 4.5 4.0 3.5 3.0 2.5 2.0 1.5 1.0 0.5 0.0 ppm

1.99  
0.99  
2.00  
4.00

1.01

2.01

N-(4-chlorobenzyl)benzamide  
C13CPD CDC13

— 167.499

136.845  
134.101  
133.176  
131.562  
129.025  
128.718  
128.501  
126.954

— 77.000

— 43.214

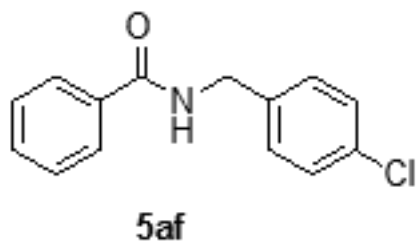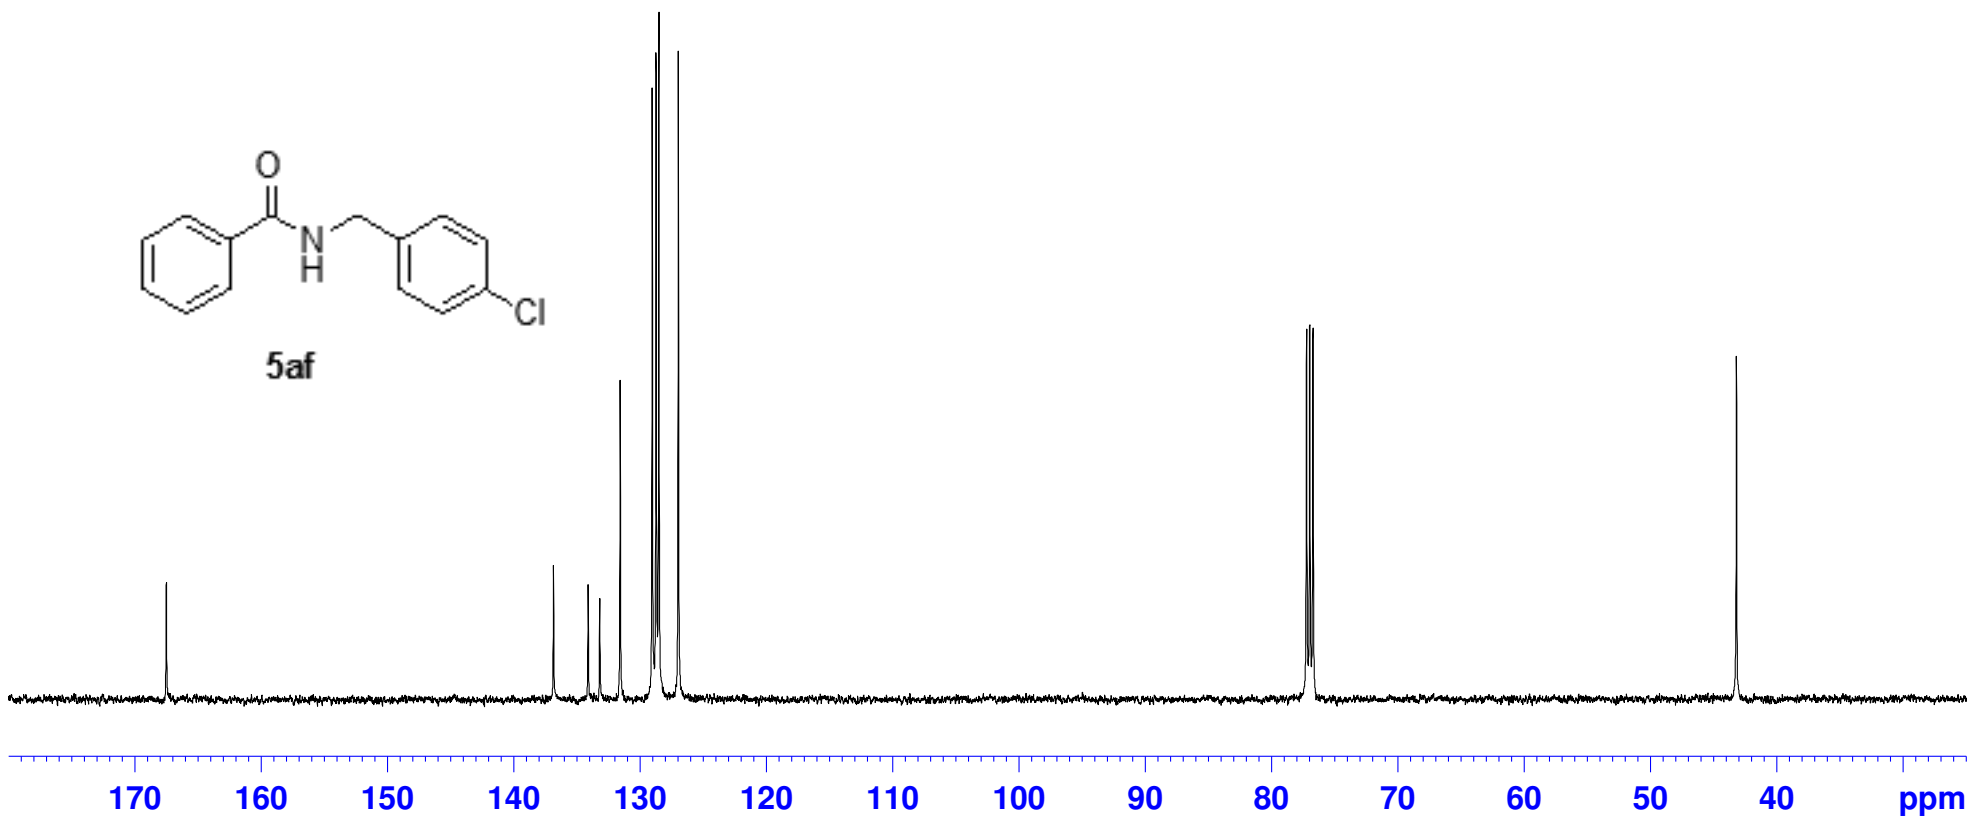

N-[(2,4-dichlorophenyl)methyl]- Benzamide  
Proton CDC13

7.783  
7.768  
7.527  
7.513  
7.498  
7.452  
7.436  
7.427  
7.422  
7.410  
7.407  
7.403  
7.261  
7.242  
7.238  
7.225  
7.221  
6.618

4.695  
4.683

0.000

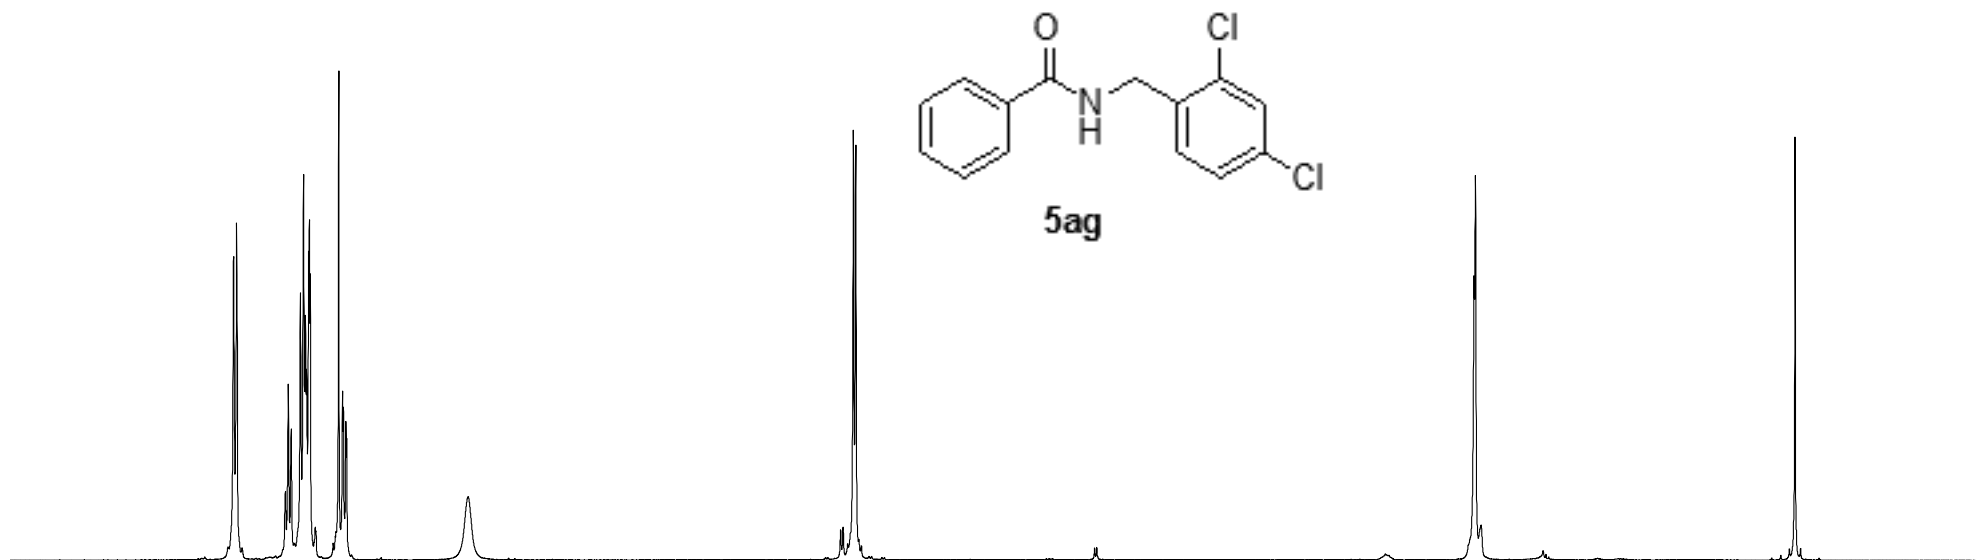

8.5 8.0 7.5 7.0 6.5 6.0 5.5 5.0 4.5 4.0 3.5 3.0 2.5 2.0 1.5 1.0 0.5 0.0 ppm

2.00  
1.00  
4.00  
1.00  
1.00

2.00

N-[(2,4-dichlorophenyl)methyl]- Benzamide  
C13CPD CDCl3

— 167.498

134.270  
134.119  
133.979  
131.670  
131.007  
130.852  
129.281  
128.555  
127.293  
126.954

— 77.000

— 41.368

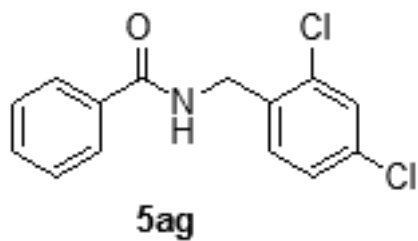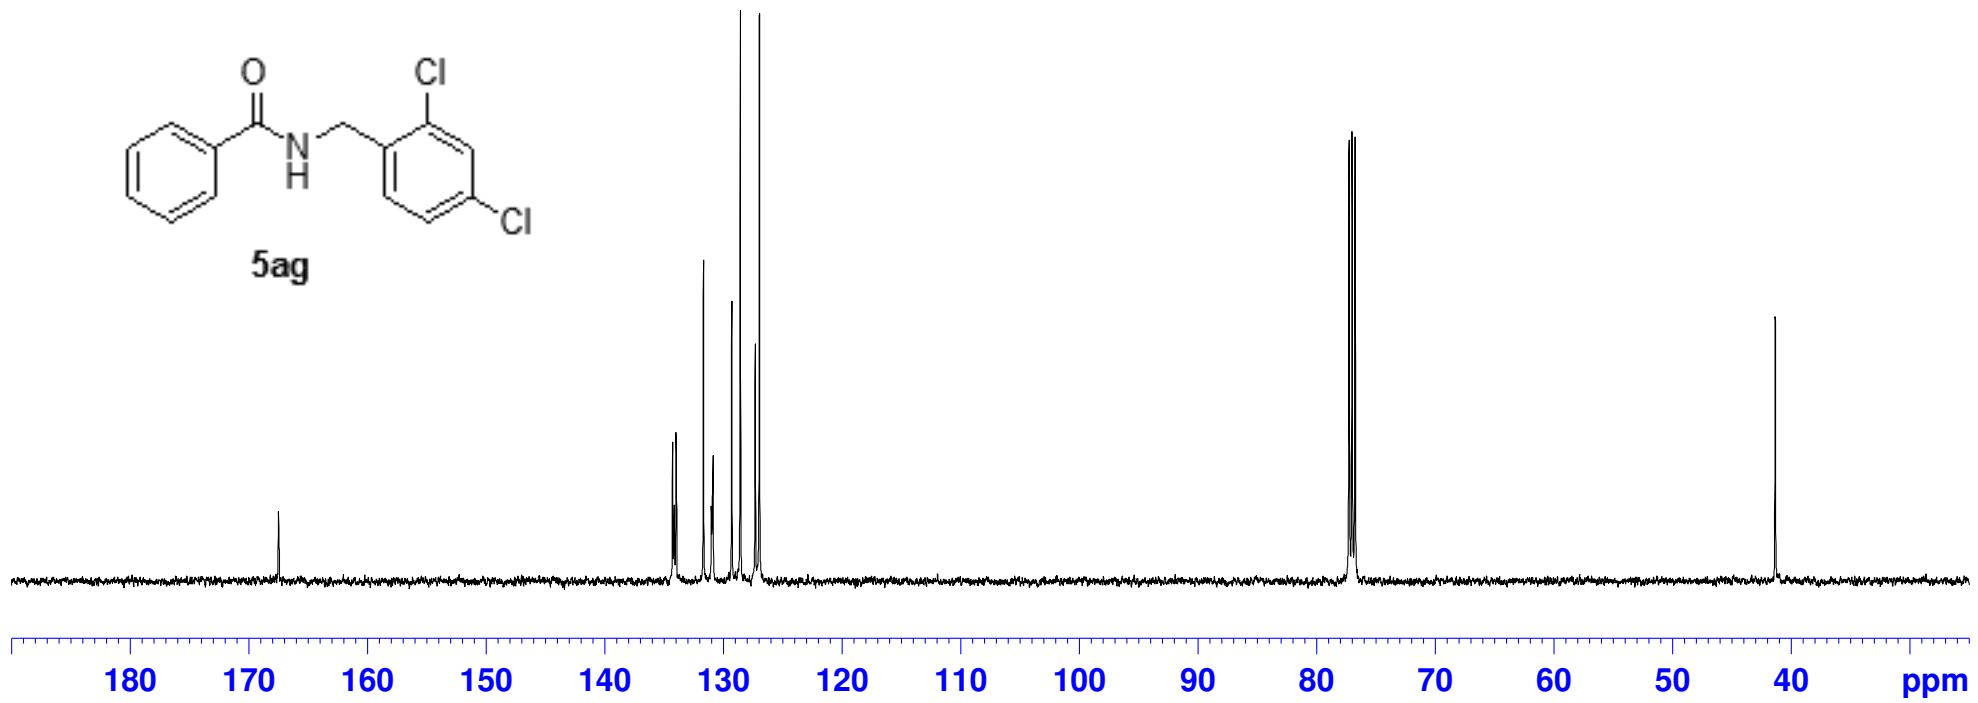



N-(4-bromobenzyl)benzamide  
Proton CDCl<sub>3</sub>

7.793  
7.778  
7.530  
7.515  
7.501  
7.481  
7.465  
7.455  
7.440  
7.425  
7.263  
7.244  
7.228  
6.467

4.608  
4.597

0.000

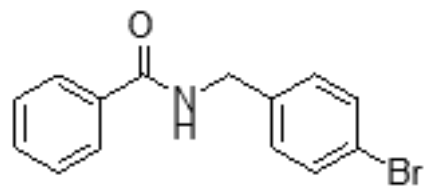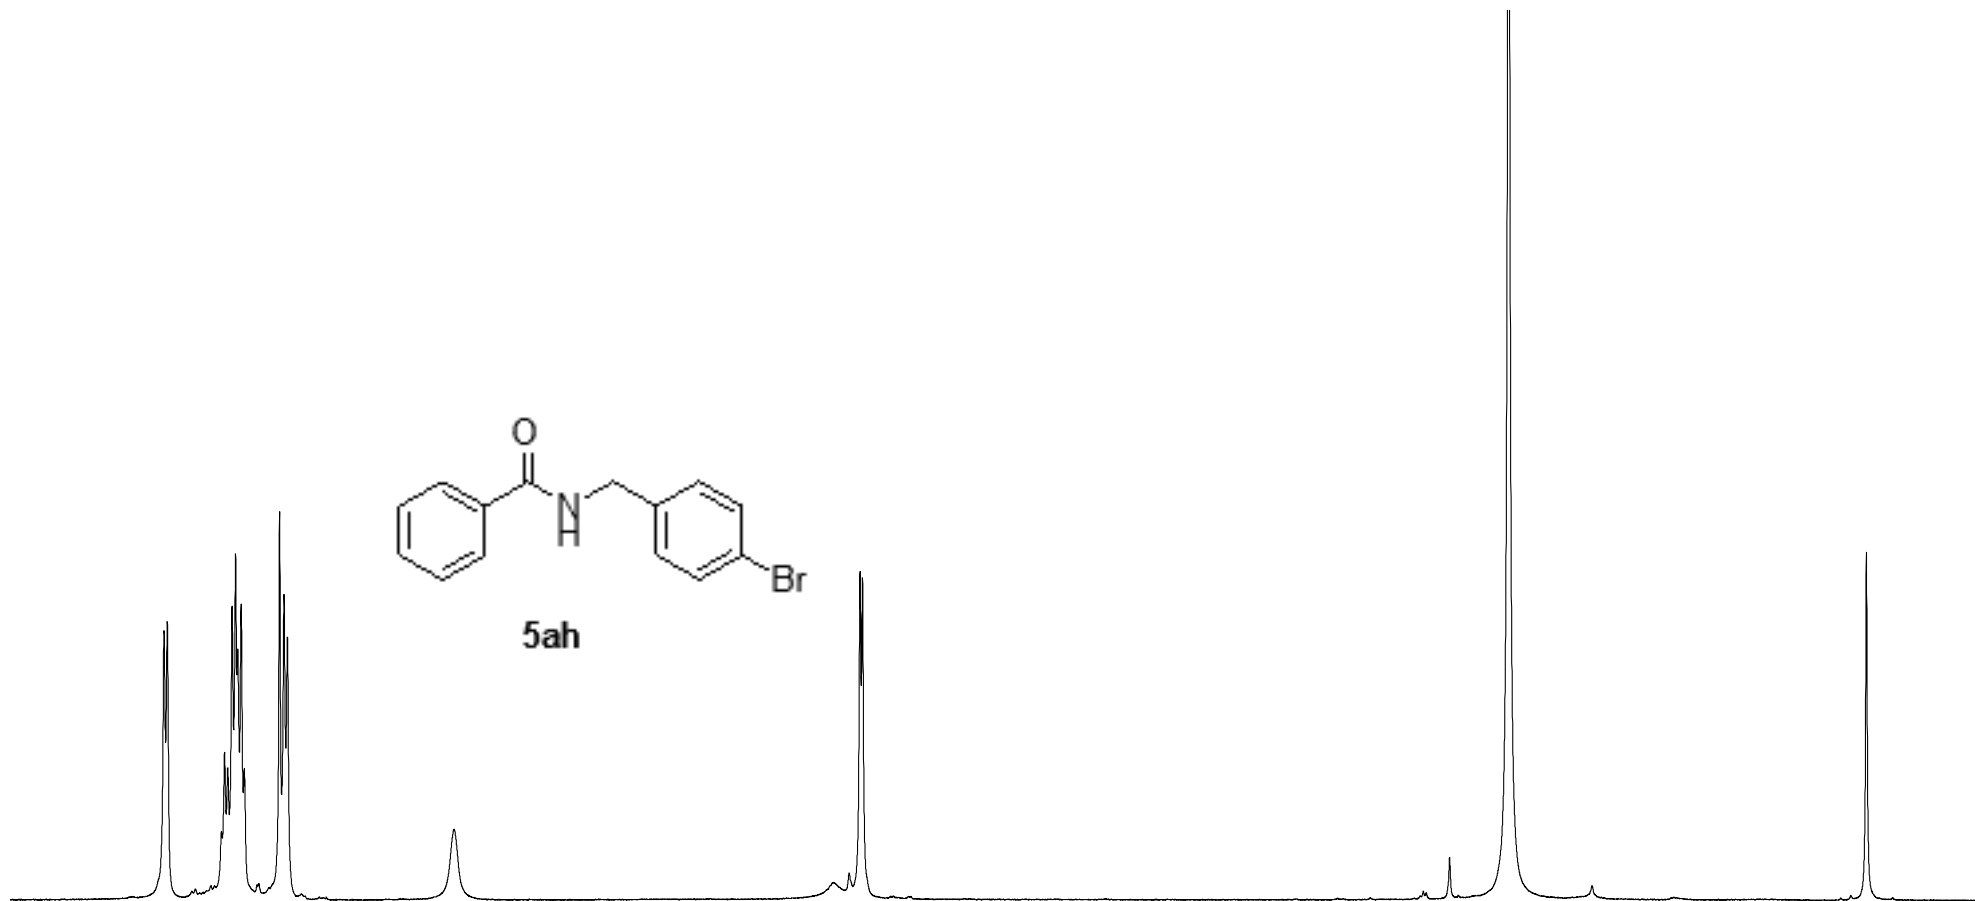

8.0 7.5 7.0 6.5 6.0 5.5 5.0 4.5 4.0 3.5 3.0 2.5 2.0 1.5 1.0 0.5 0.0 ppm

2.00  
5.01  
1.90  
1.00

2.00

N-(4-bromobenzyl)benzamide  
C13CPD CDC13

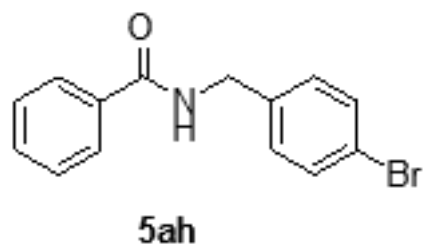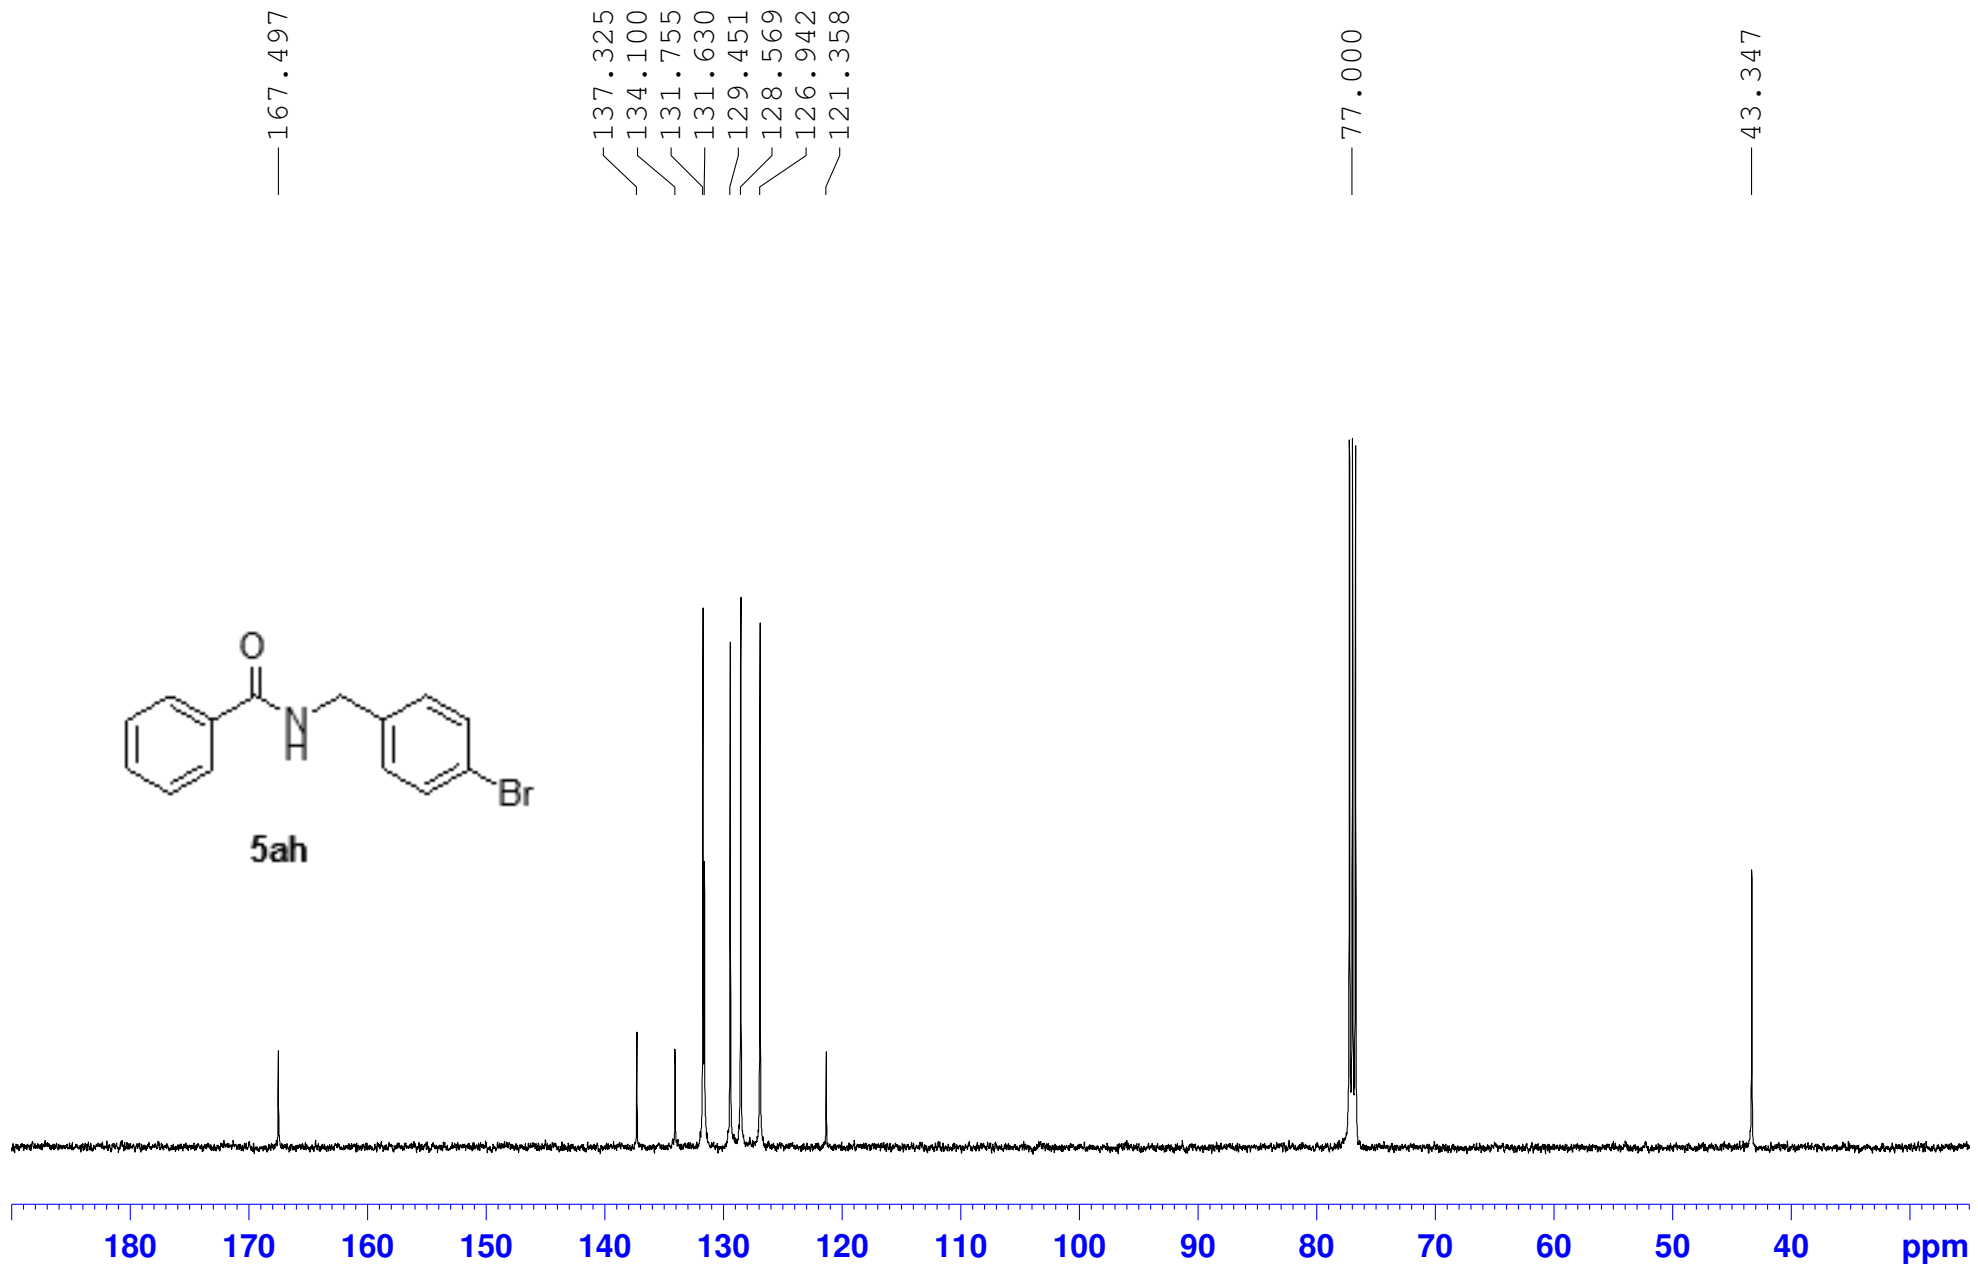

N-(4-(trifluoromethyl)benzyl)benzamide  
Proton CDCl<sub>3</sub>

7.808  
7.795  
7.611  
7.597  
7.526  
7.510  
7.476  
7.462  
7.448  
7.263  
— 6.573

— 4.709

— 0.000

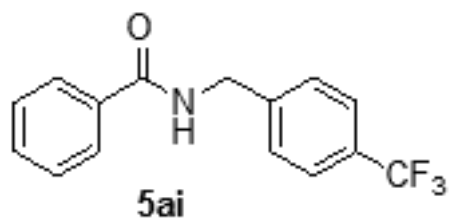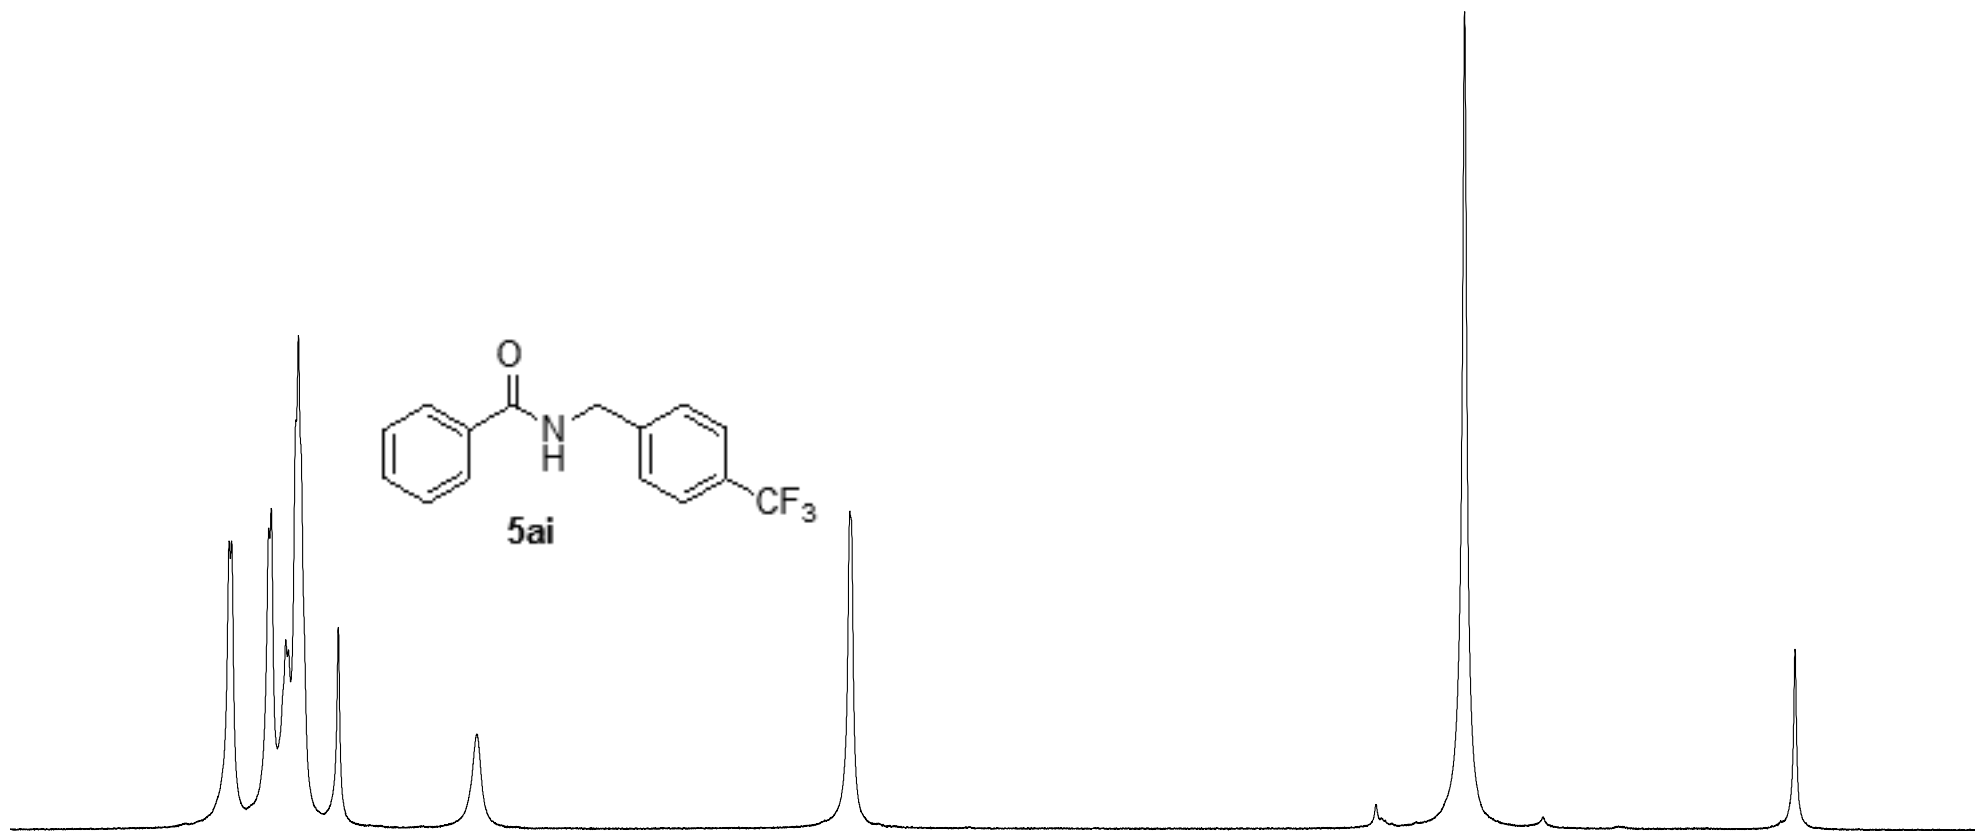

8.5 8.0 7.5 7.0 6.5 6.0 5.5 5.0 4.5 4.0 3.5 3.0 2.5 2.0 1.5 1.0 0.5 0.0 ppm

2.00  
7.00

0.99

2.00

N-(4-(trifluoromethyl)benzyl)benzamide  
C13CPD CDCl3

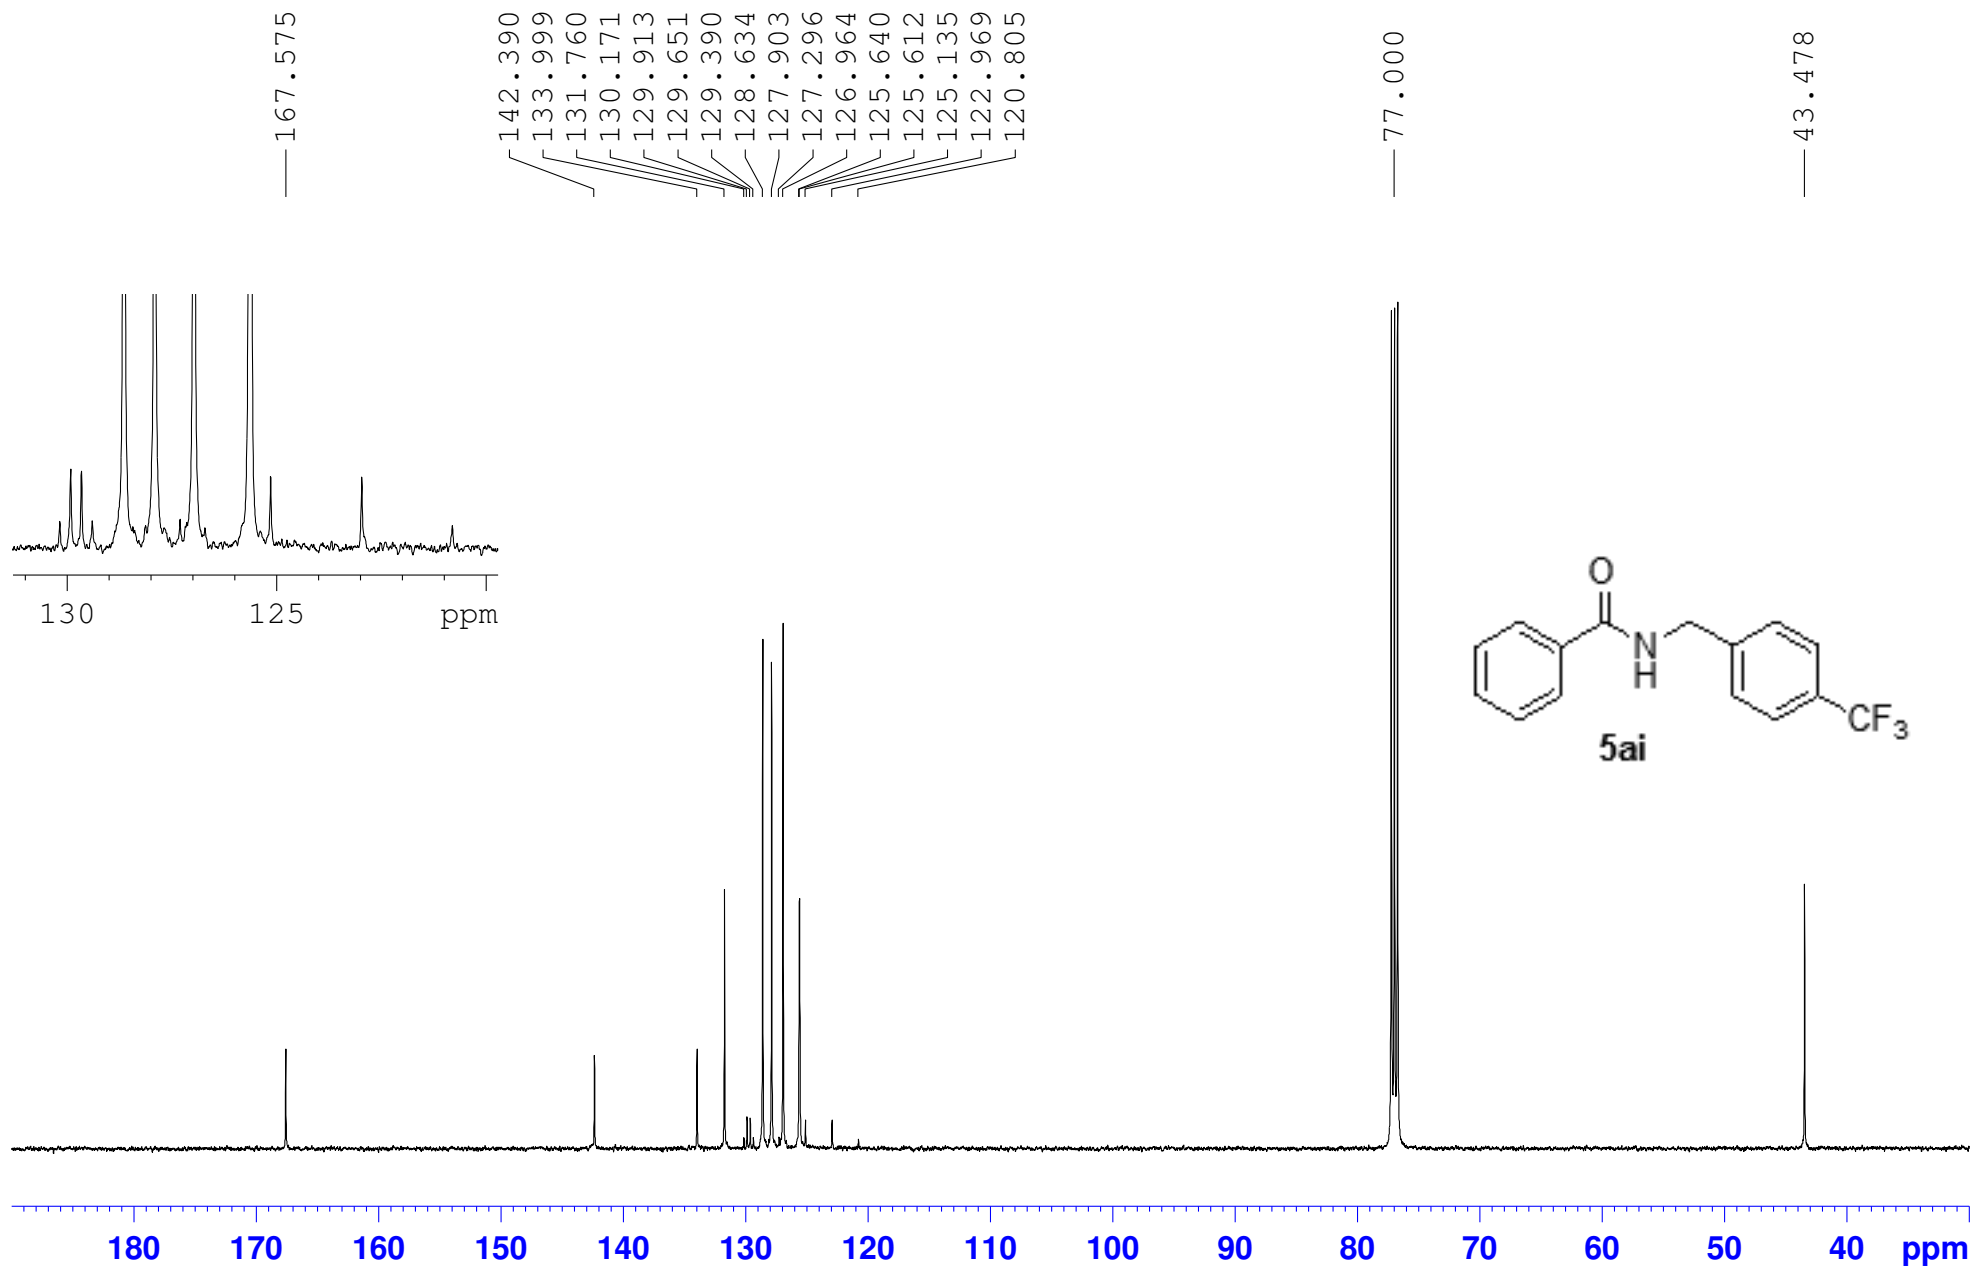

N-(4-(trifluoromethoxy)benzyl)benzamide  
Proton CDCl<sub>3</sub>

7.802  
7.787  
7.531  
7.516  
7.501  
7.454  
7.439  
7.424  
7.393  
7.376  
7.260  
7.203  
7.186  
6.489

4.657  
4.646

0.000

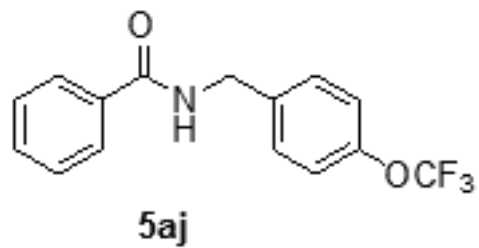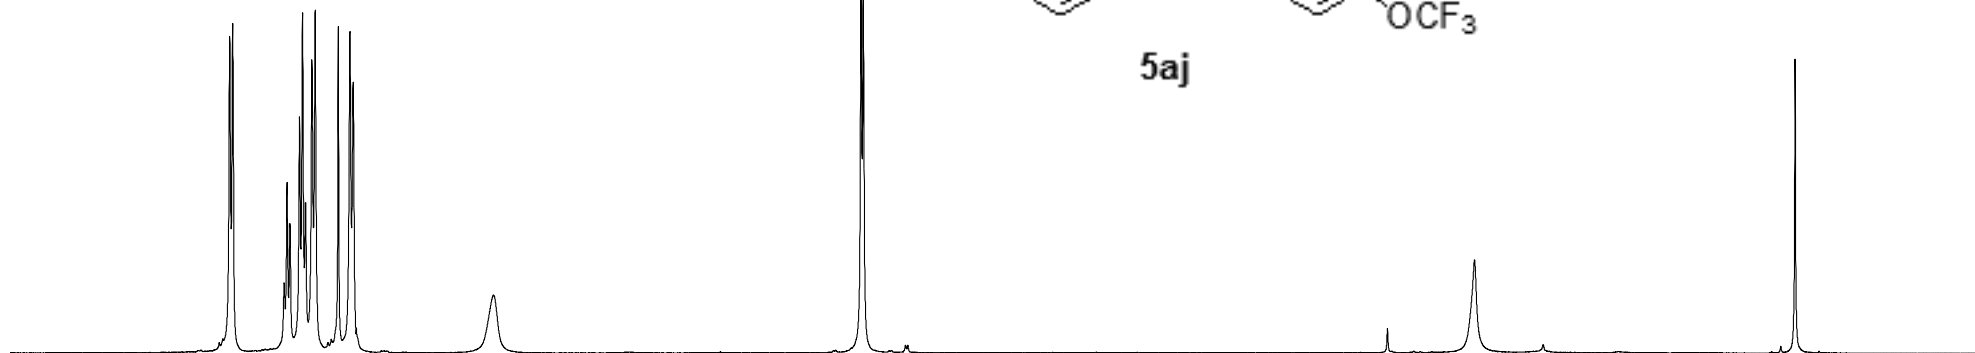

8.5 8.0 7.5 7.0 6.5 6.0 5.5 5.0 4.5 4.0 3.5 3.0 2.5 2.0 1.5 1.0 0.5 0.0 ppm

N-(4-(trifluoromethoxy)benzyl)benzamide  
C13CPD CDCl3

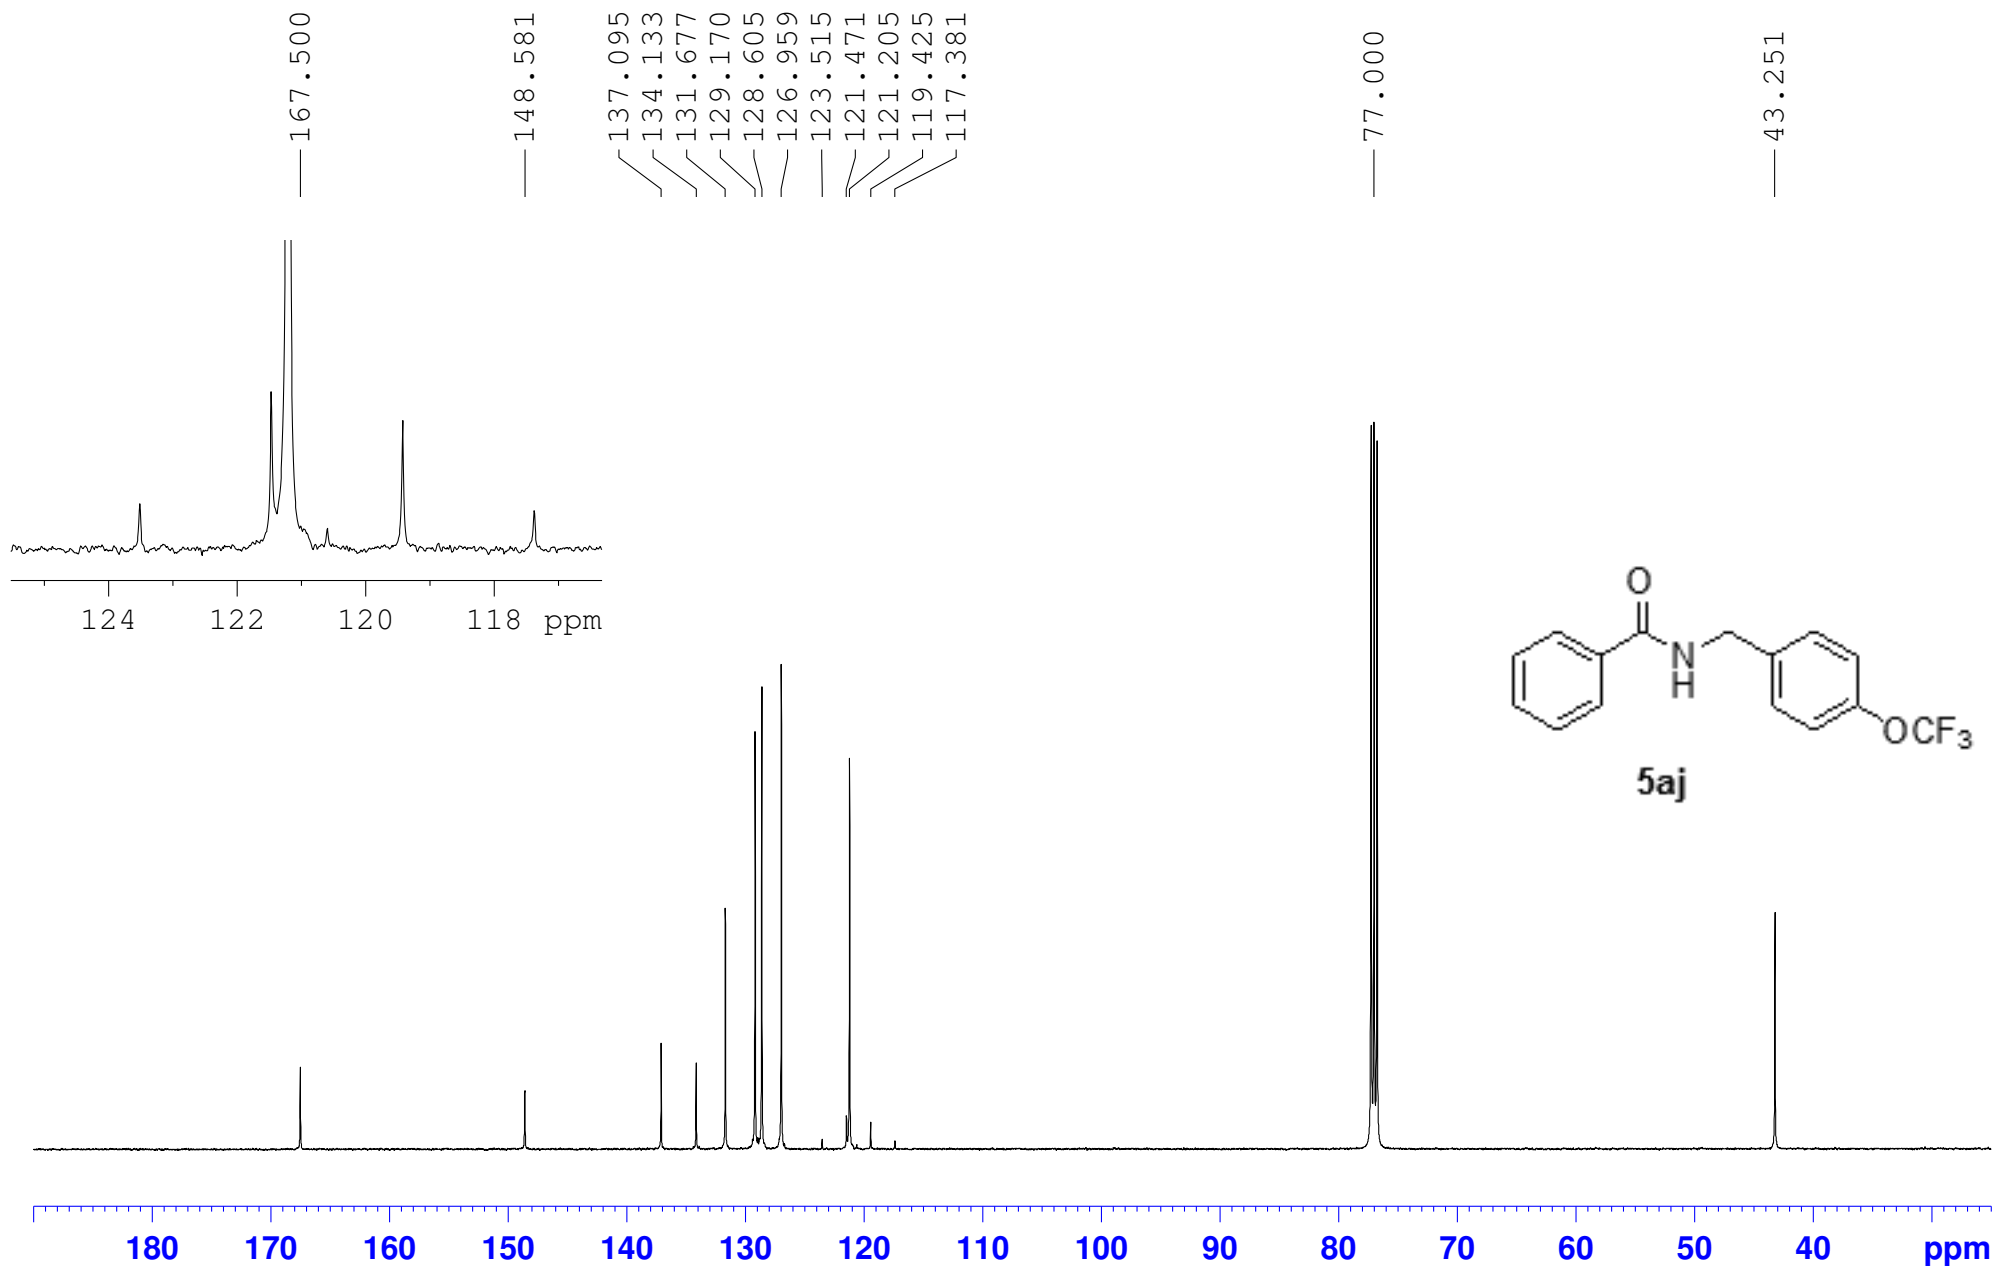

N-(naphthalen-2-ylmethyl)benzamide  
Proton CDCl<sub>3</sub>

7.843  
7.826  
7.821  
7.805  
7.789  
7.520  
7.506  
7.487  
7.480  
7.472  
7.468  
7.448  
7.433  
7.418  
7.256  
6.512

4.816  
4.806

-0.001

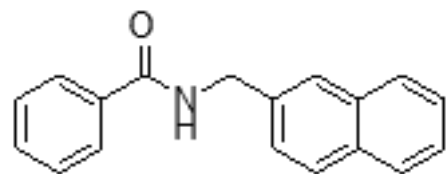

5ak

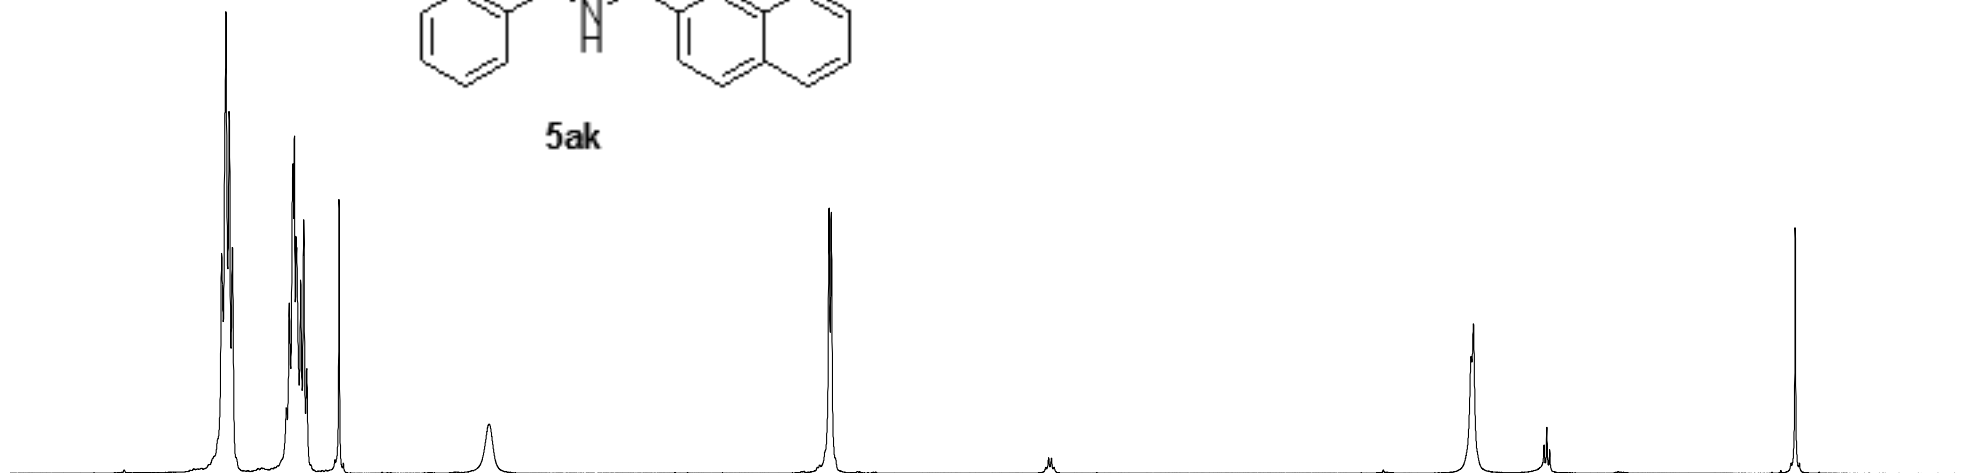

8.5 8.0 7.5 7.0 6.5 6.0 5.5 5.0 4.5 4.0 3.5 3.0 2.5 2.0 1.5 1.0 0.5 0.0 ppm

6.00  
6.00

1.00

2.00

N-(naphthalen-2-ylmethyl)benzamide  
C13CPD CDCl3

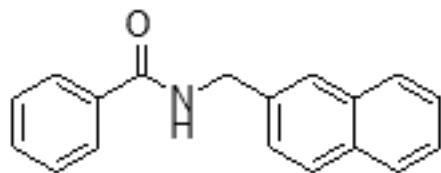

5ak

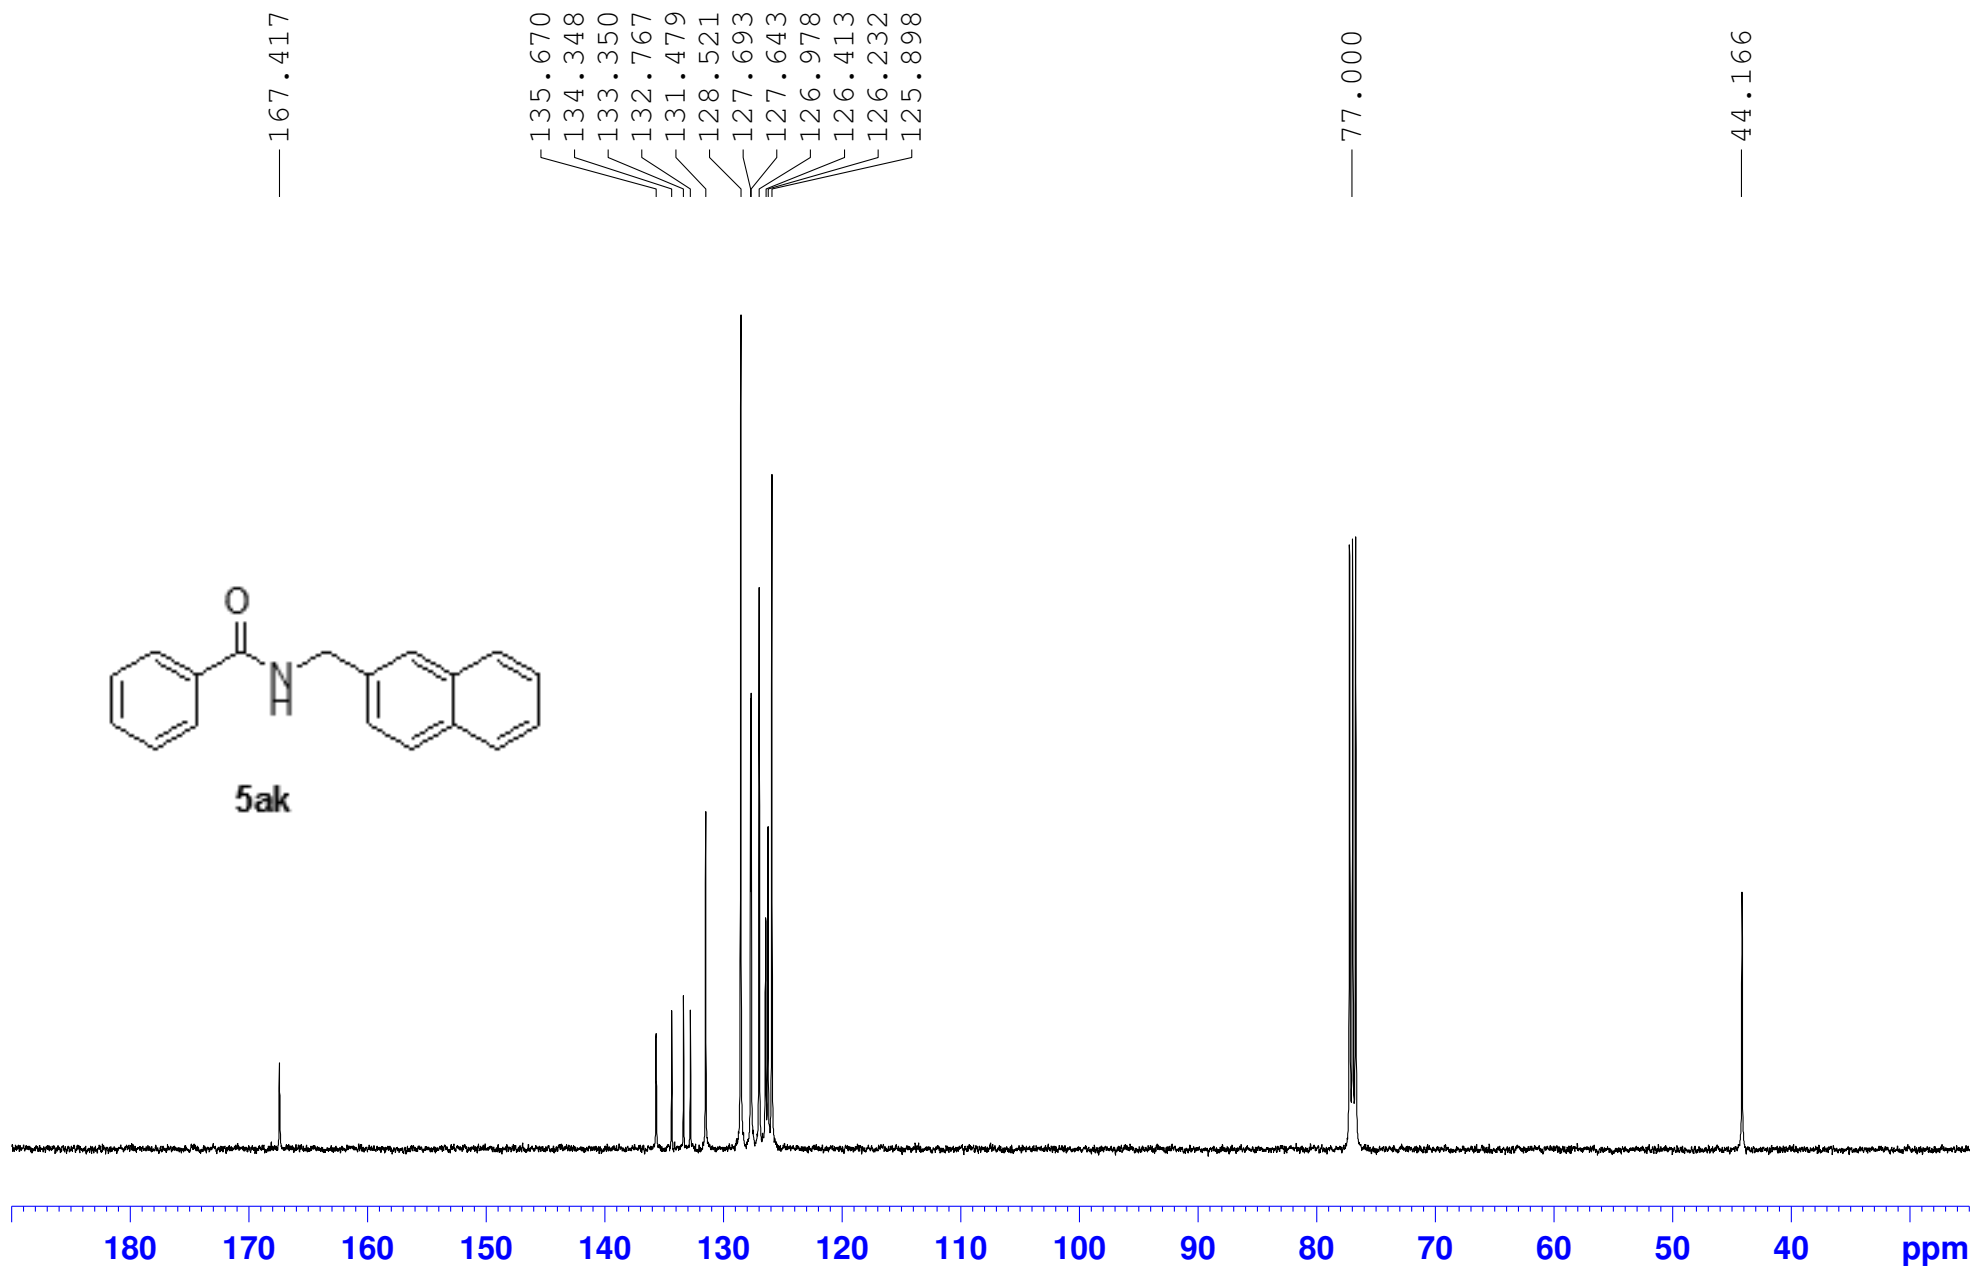



N-(furan-2-ylmethyl)benzamide  
Proton CDCl<sub>3</sub>

7.795  
7.778  
7.521  
7.506  
7.491  
7.448  
7.432  
7.418  
7.383  
7.265  
6.475  
6.348  
6.311

4.655  
4.643

0.000

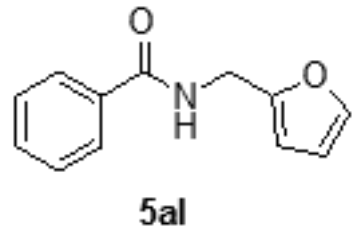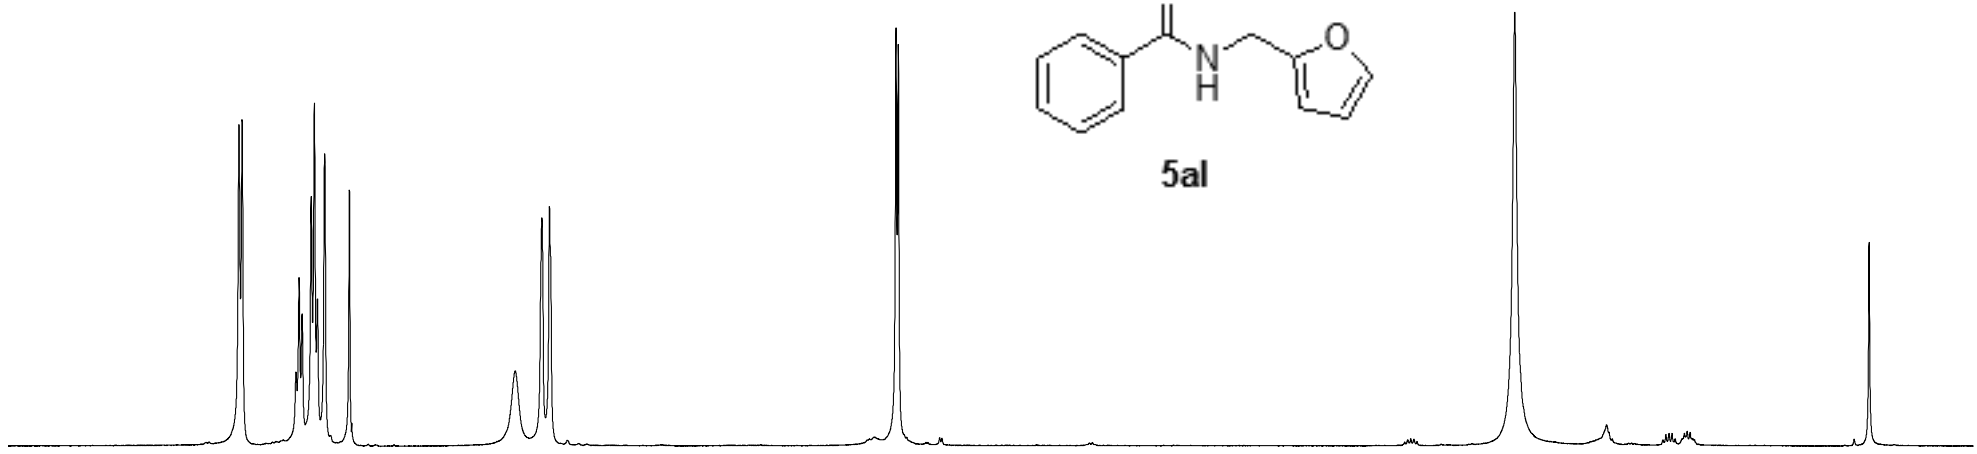

8.5 8.0 7.5 7.0 6.5 6.0 5.5 5.0 4.5 4.0 3.5 3.0 2.5 2.0 1.5 1.0 0.5 ppm

1.99  
1.00  
2.90  
1.01  
2.01  
2.00

N-(furan-2-ylmethyl)benzamide  
C13CPD CDC13

—167.261

—151.130

—142.217

—134.053

—131.544

—128.493

—126.958

—110.451

—107.614

—77.000

—36.924

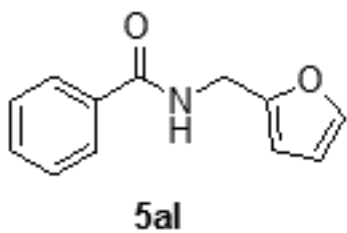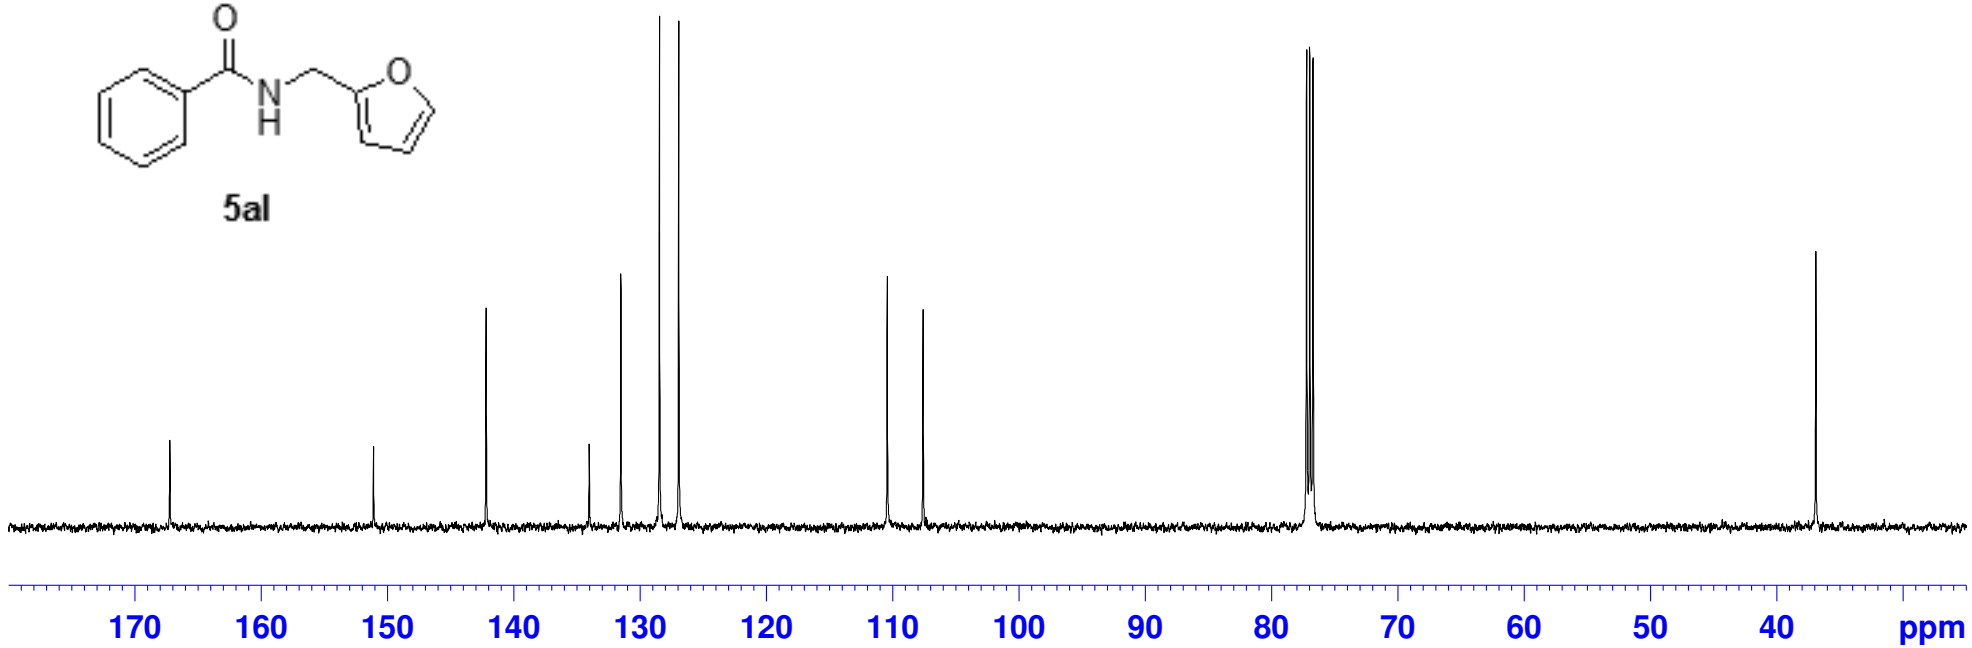

N-(thiophen-2-ylmethyl)benzamide  
Proton CDCl<sub>3</sub>

7.791  
7.776  
7.519  
7.504  
7.489  
7.445  
7.429  
7.415  
7.260  
7.246  
7.051  
7.045  
6.984  
6.976  
6.967  
6.463

4.827  
4.816

0.000

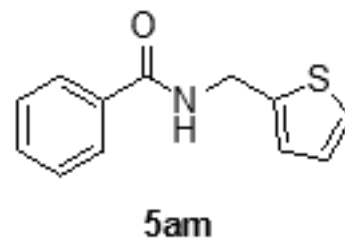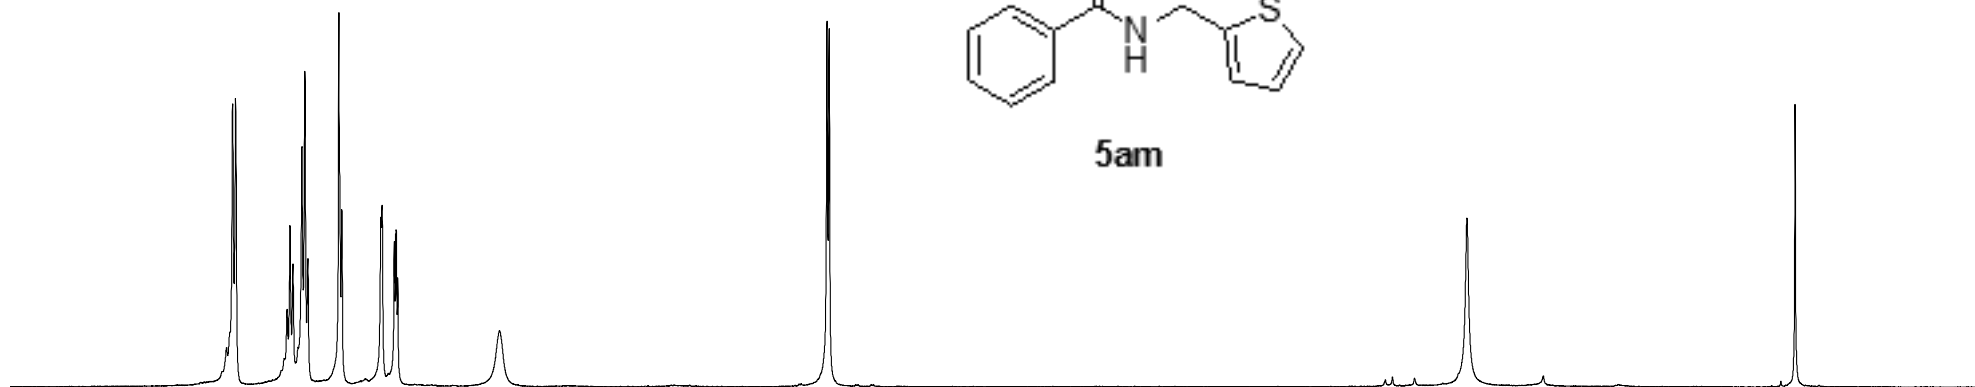

8.5 8.0 7.5 7.0 6.5 6.0 5.5 5.0 4.5 4.0 3.5 3.0 2.5 2.0 1.5 1.0 0.5 0.0 ppm

2.00  
1.00  
2.00  
1.54  
1.00  
1.00  
1.00

2.00

N-(thiophen-2-ylmethyl)benzamide  
C13CPD CDCl3

—167.203

—140.822

134.054

131.518

128.470

126.974

126.842

126.070

125.169

—77.000

—38.714

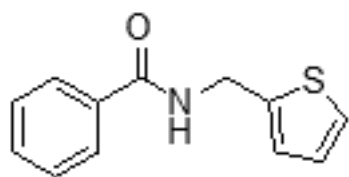

5am

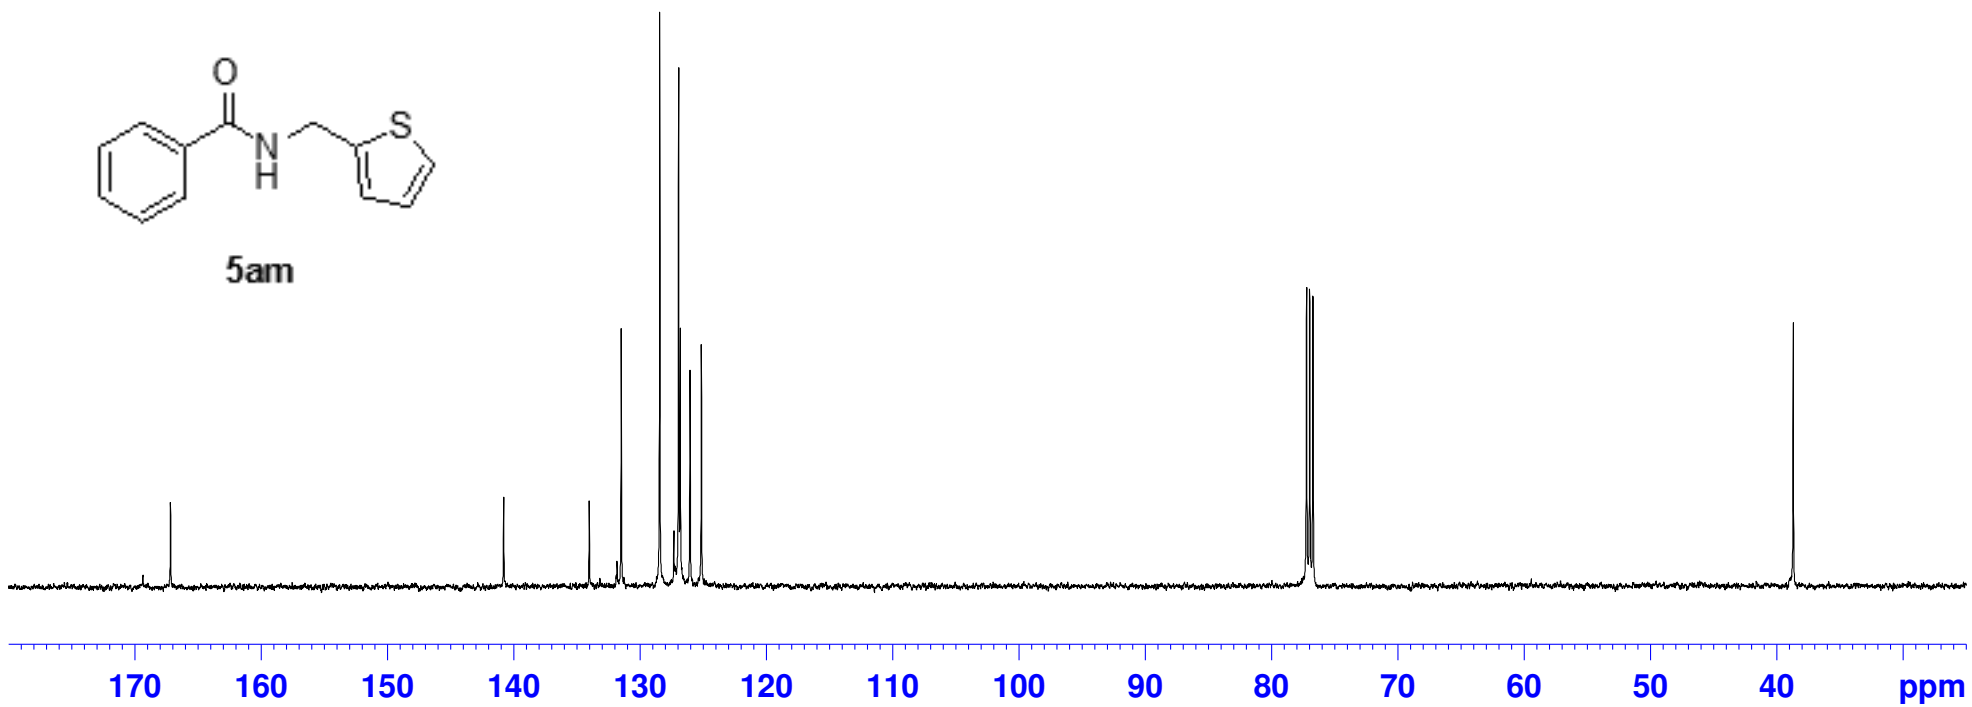

N-butylbenzamide  
Proton CDCl<sub>3</sub>

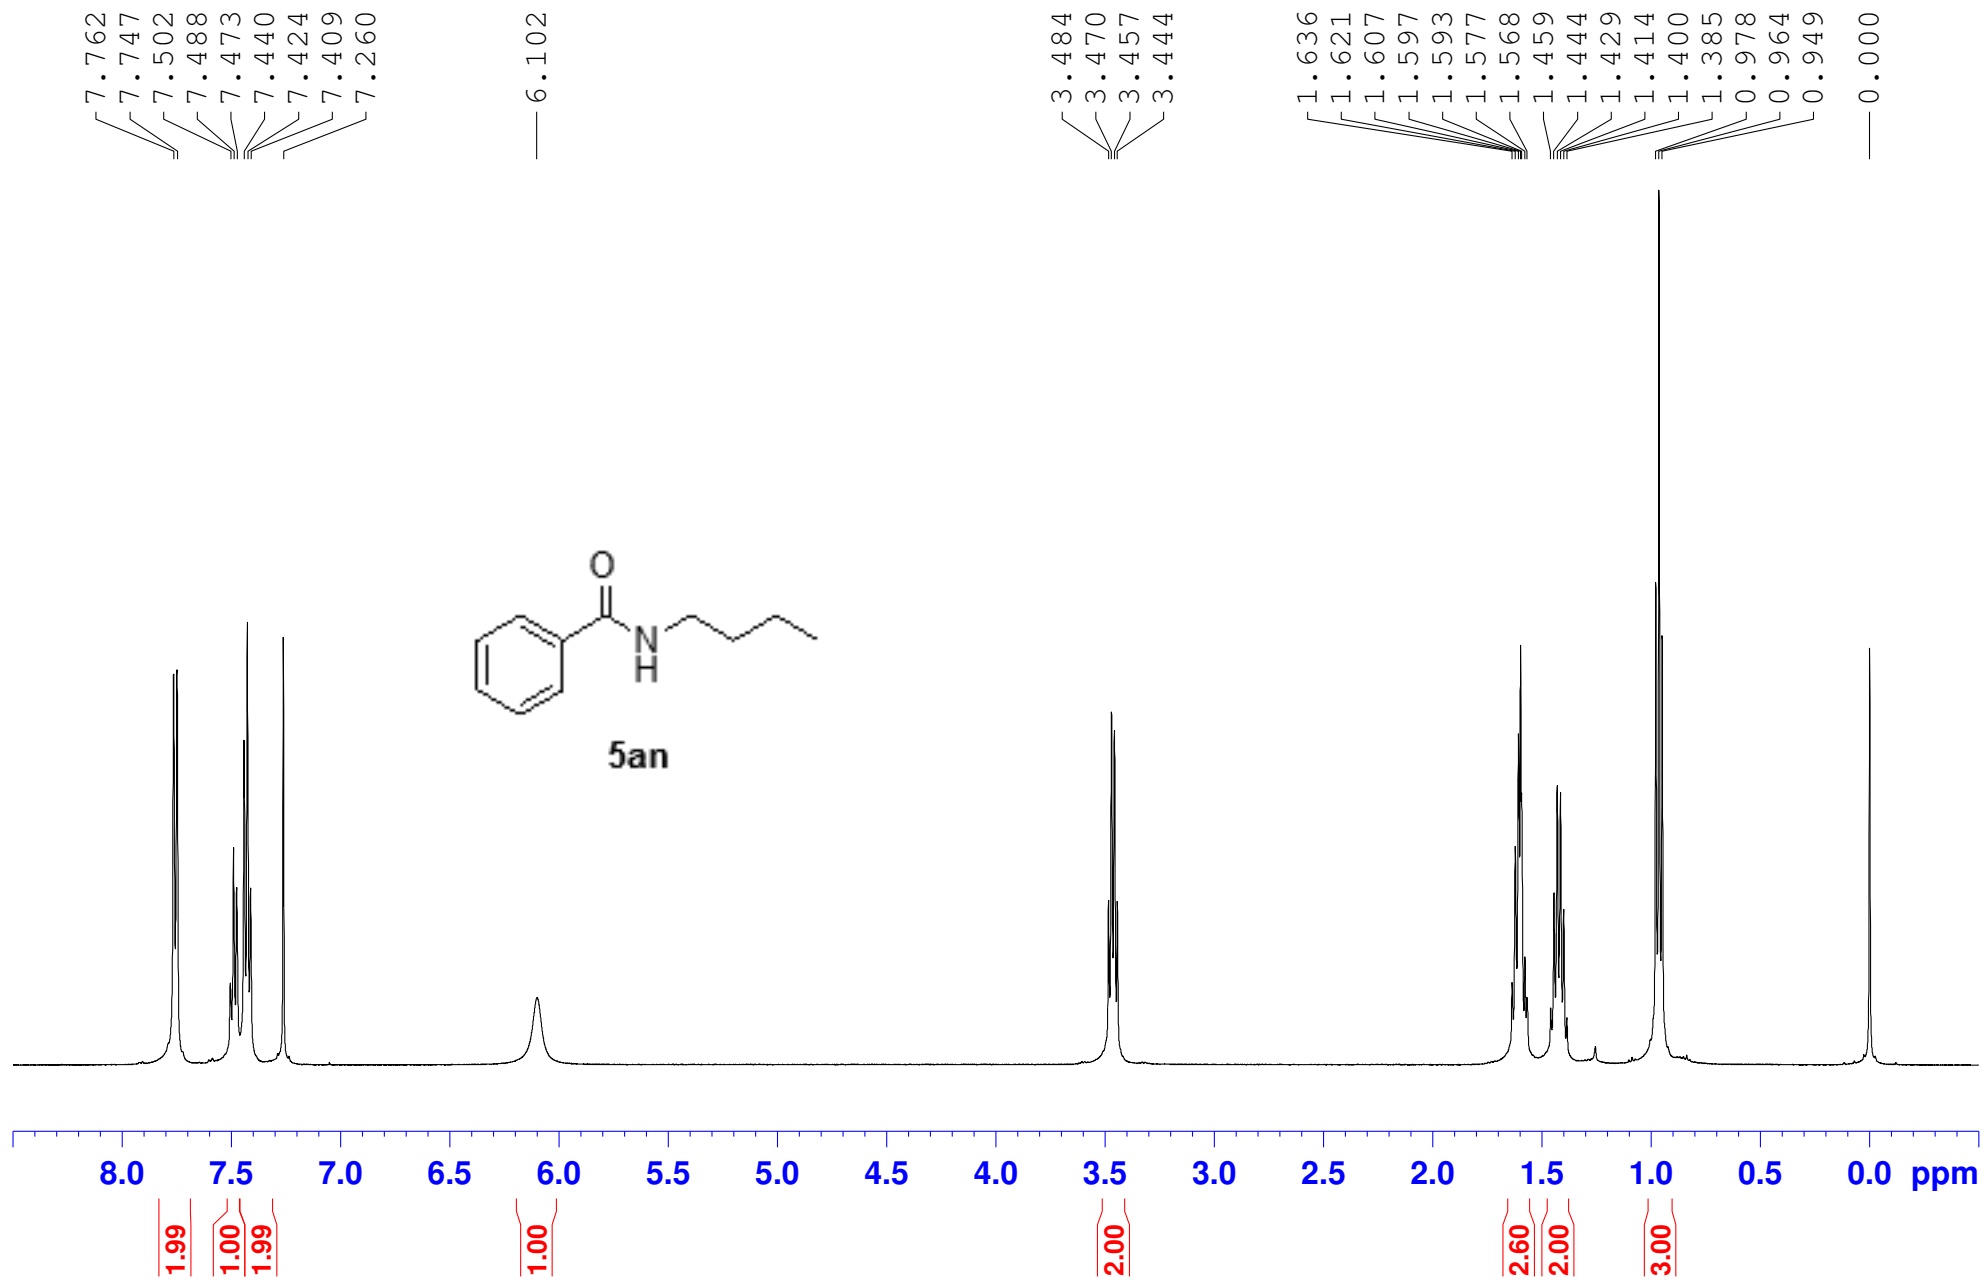

N-butylbenzamide  
C13CPD CDC13

— 167.526

— 134.804

— 131.109

— 128.360

— 126.809

— 77.001

— 39.725

— 31.634

— 20.061

— 13.668

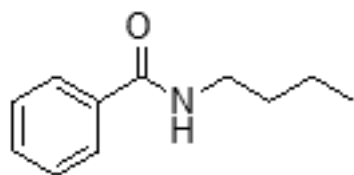

5an

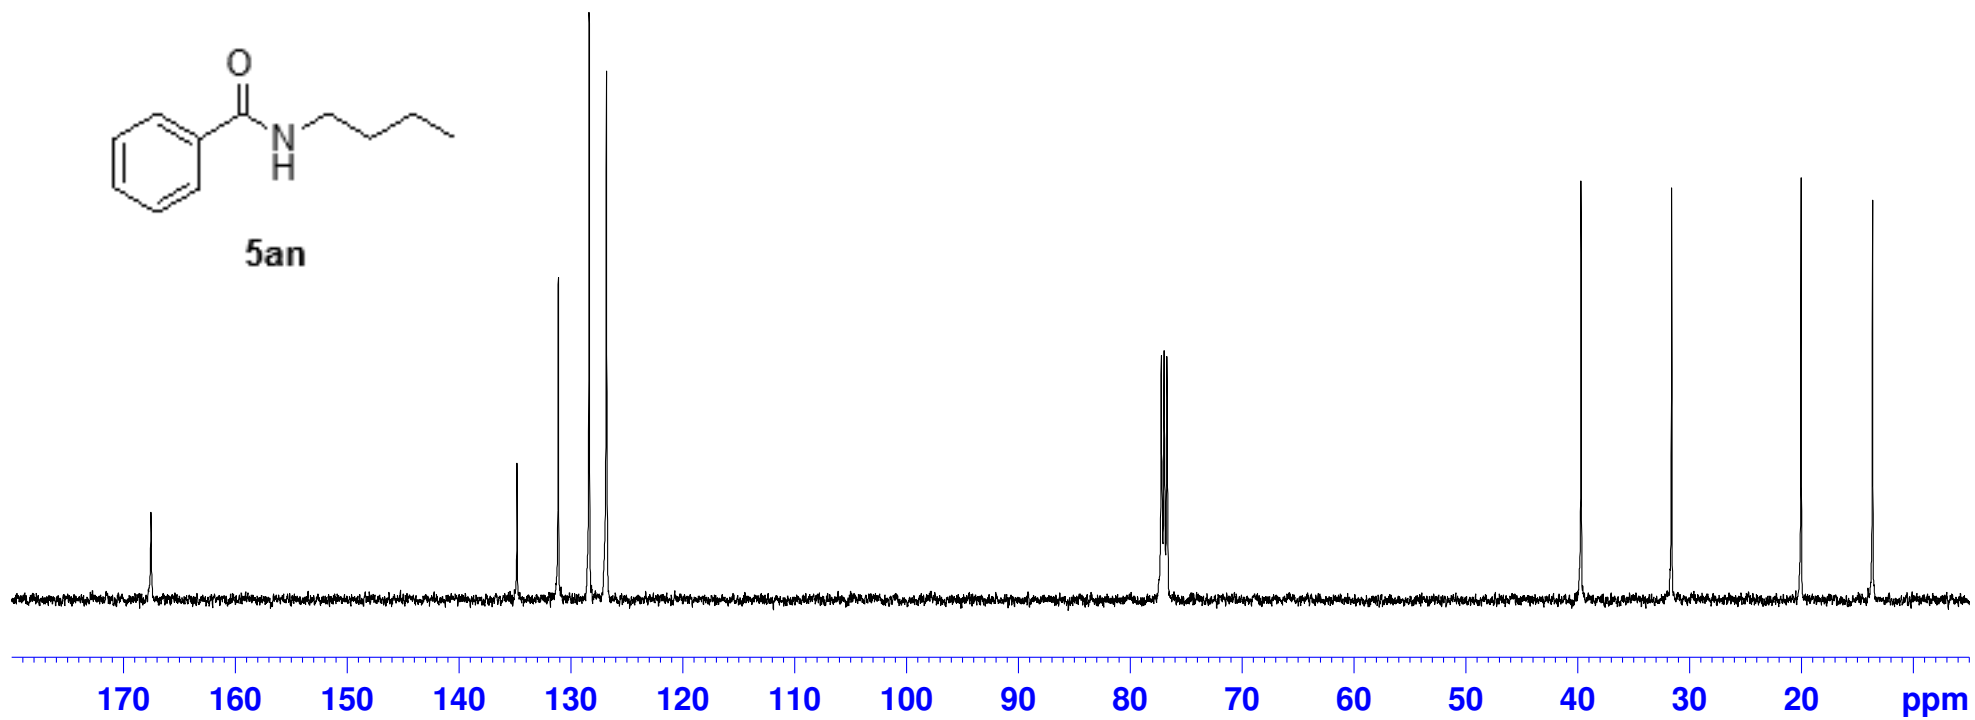

N-hexylbenzamide  
Proton CDCl<sub>3</sub>

7.765  
7.751  
7.505  
7.502  
7.500  
7.492  
7.488  
7.483  
7.475  
7.473  
7.470  
7.439  
7.423  
7.409  
7.263  
6.147

3.471  
3.457  
3.444  
3.430  
1.674  
1.665  
1.649  
1.628  
1.613  
1.599  
1.583  
1.414  
1.399  
1.386  
1.369  
1.358  
1.331  
1.317  
1.303  
0.909  
0.895  
0.881  
0.000

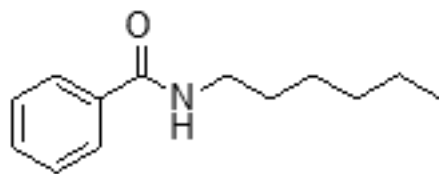

5ao

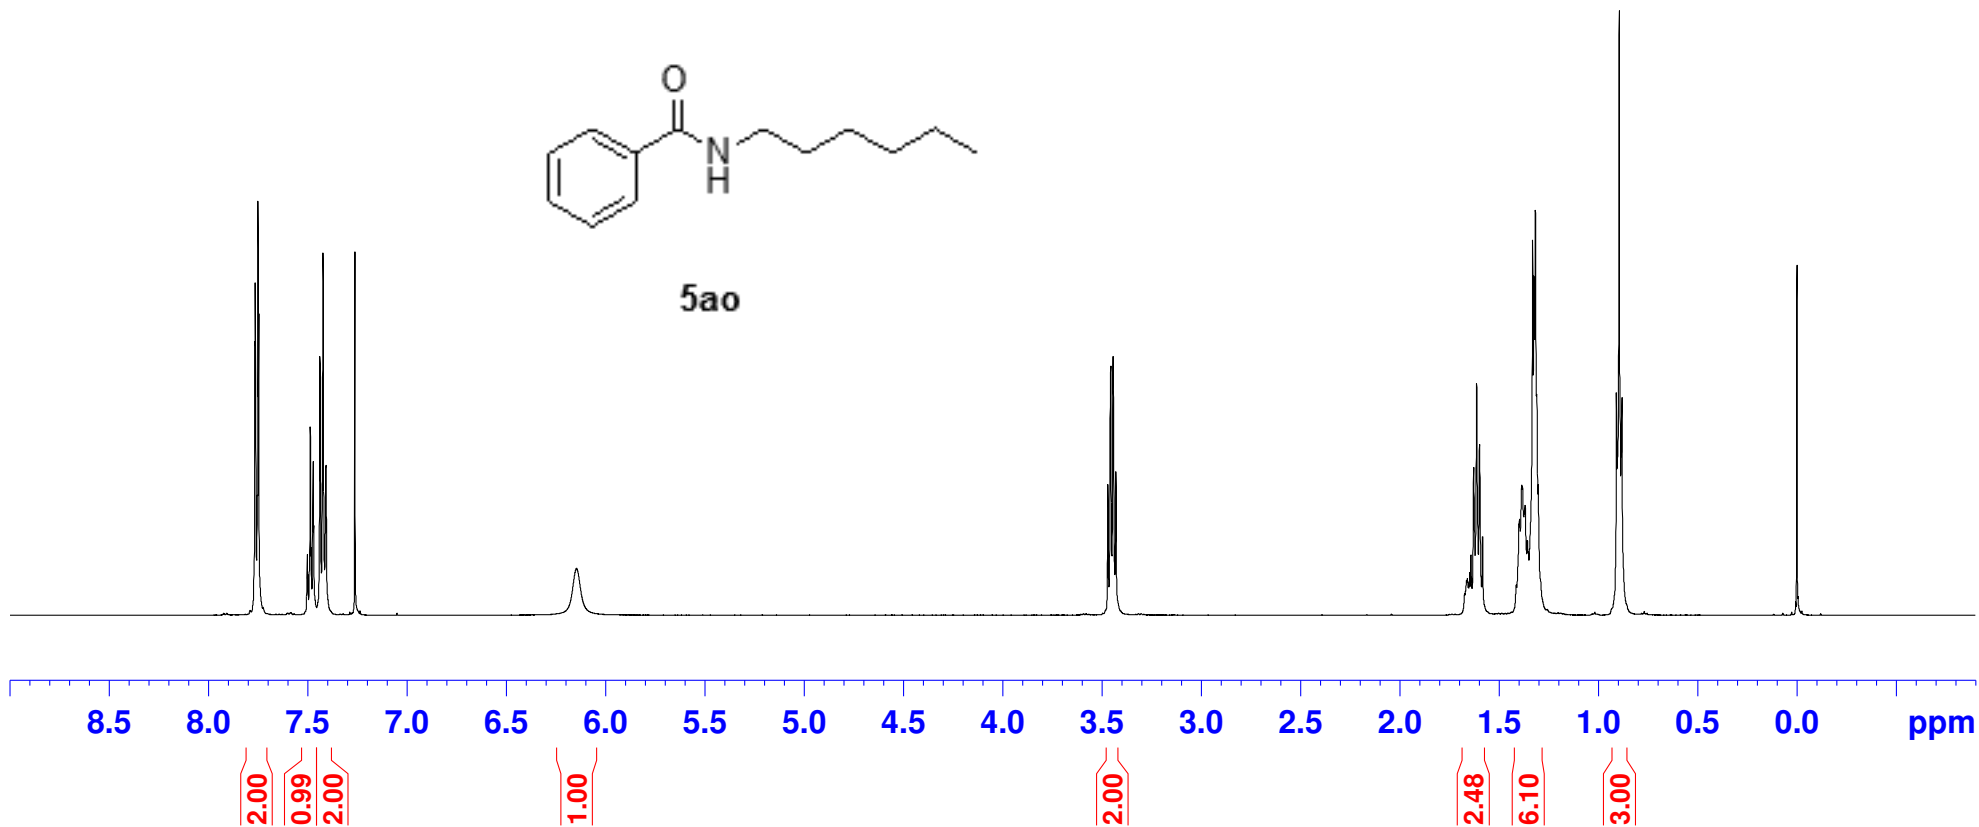

N-hexylbenzamide  
C13CPD CDC13

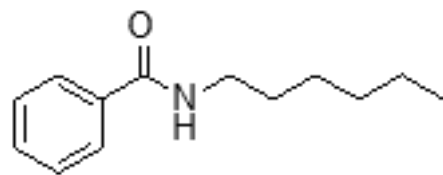

5ao

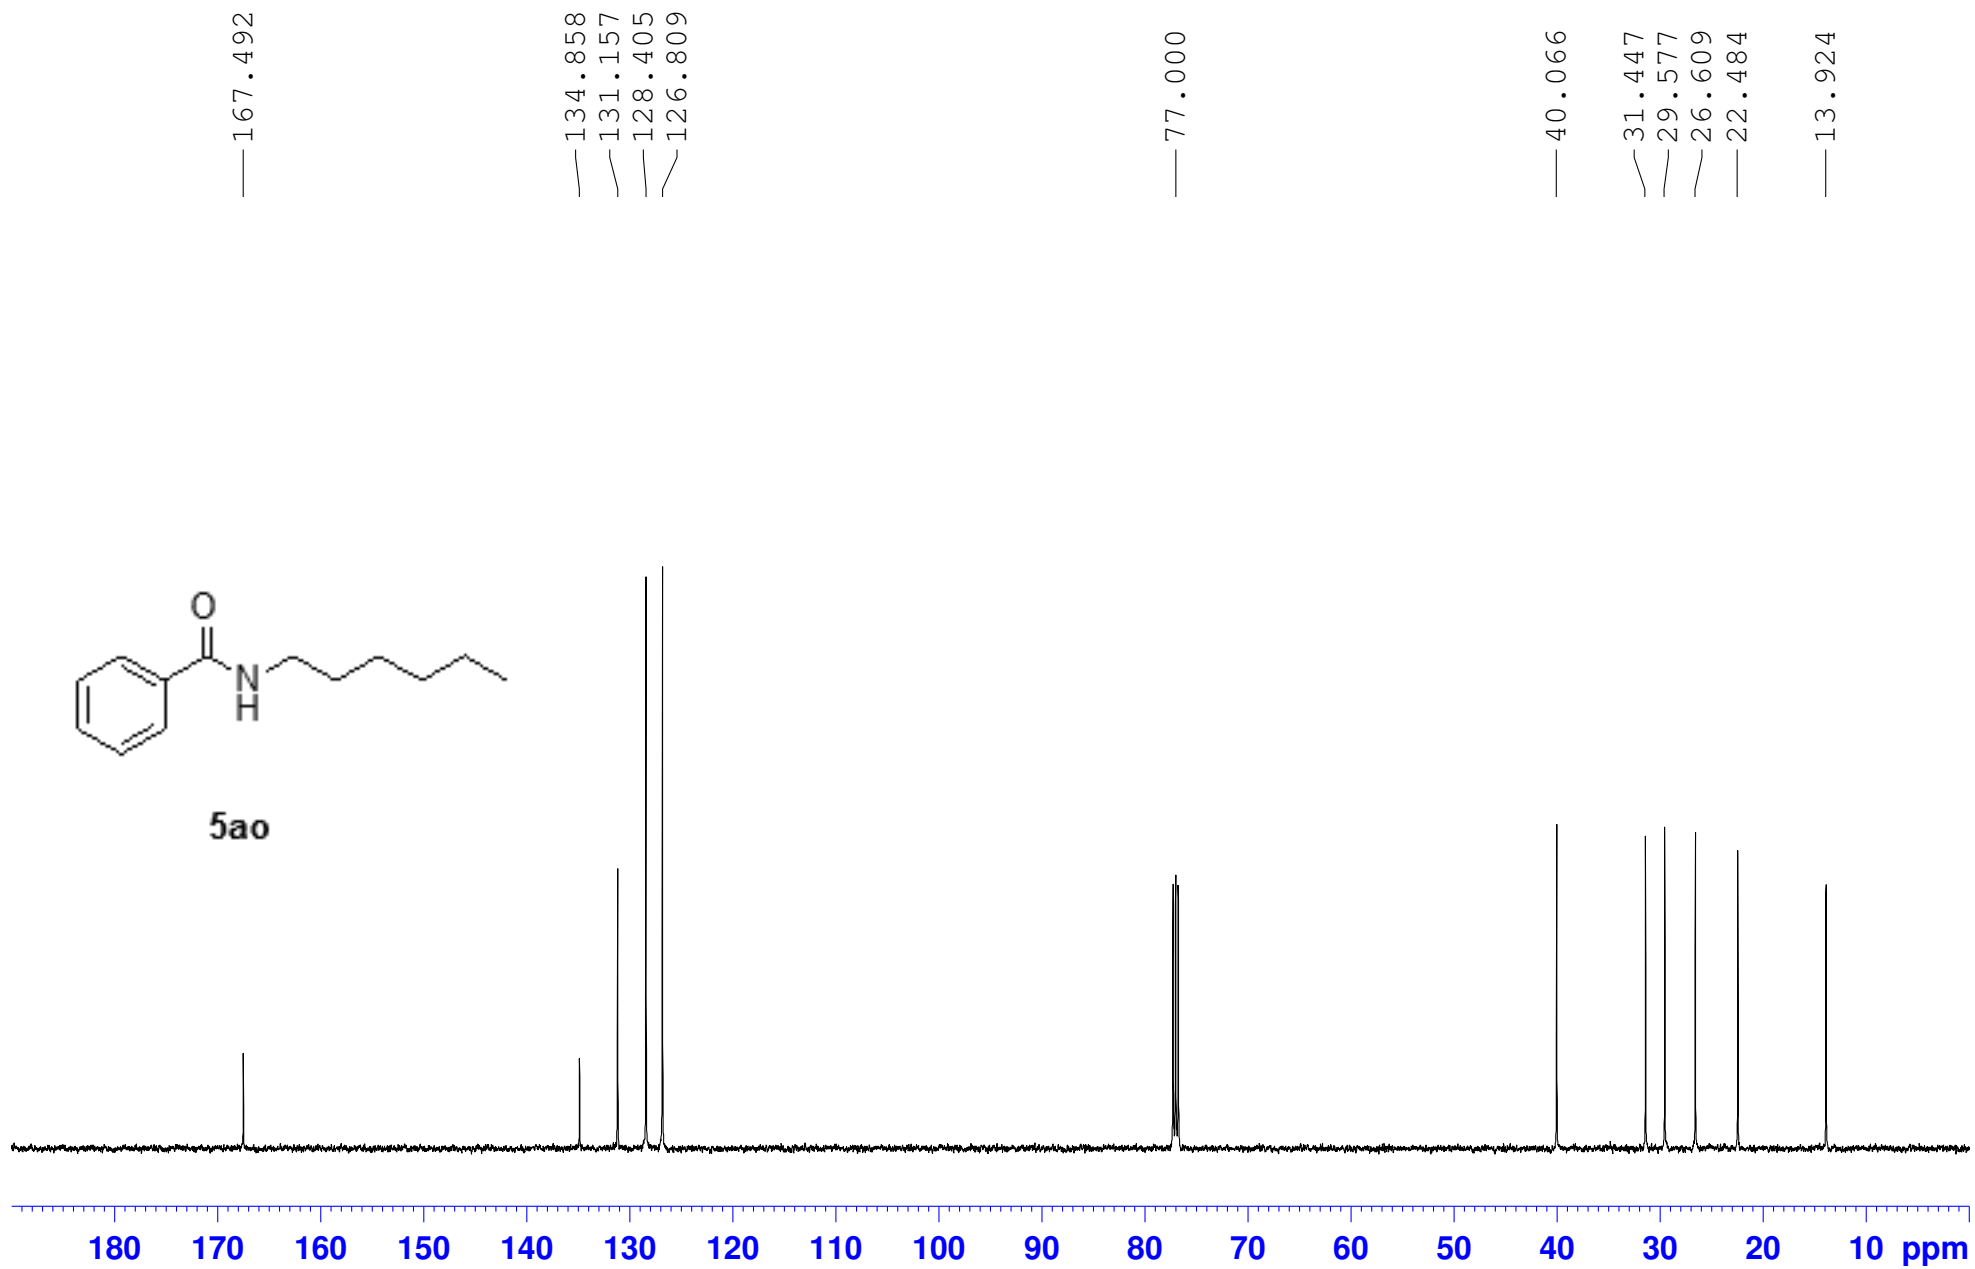



N-(cyclohexylmethyl)benzamide  
Proton CDCl<sub>3</sub>

7.768  
7.754  
7.505  
7.490  
7.476  
7.443  
7.427  
7.413  
7.263

6.183

3.320  
3.308  
3.295  
1.802  
1.773  
1.733  
1.693  
1.651  
1.614  
1.599  
1.585  
1.569  
1.555  
1.548  
1.291  
1.267  
1.241  
1.214  
1.188  
1.163  
1.138  
1.040  
1.016  
0.992  
0.969  
0.000

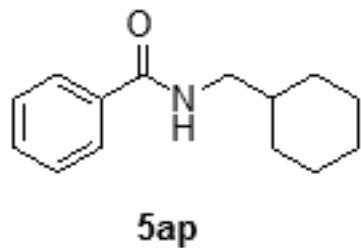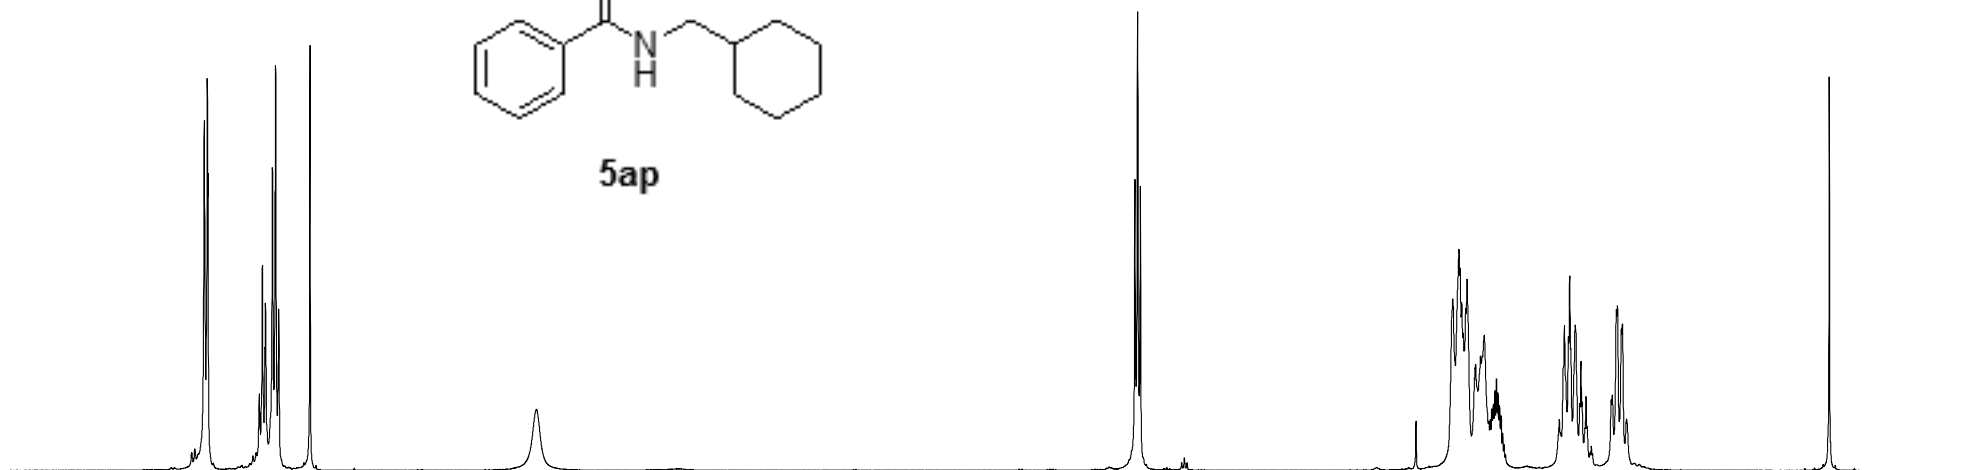

8.5 8.0 7.5 7.0 6.5 6.0 5.5 5.0 4.5 4.0 3.5 3.0 2.5 2.0 1.5 1.0 0.5 0.0 ppm

2.00  
1.00  
1.99

1.00

2.00

4.12  
2.07  
1.11  
3.25  
2.00

N-(cyclohexylmethyl)benzamide  
C13CPD CDC13

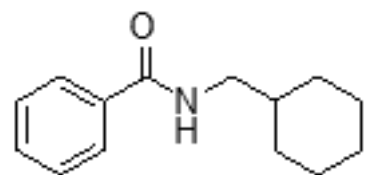

5ap

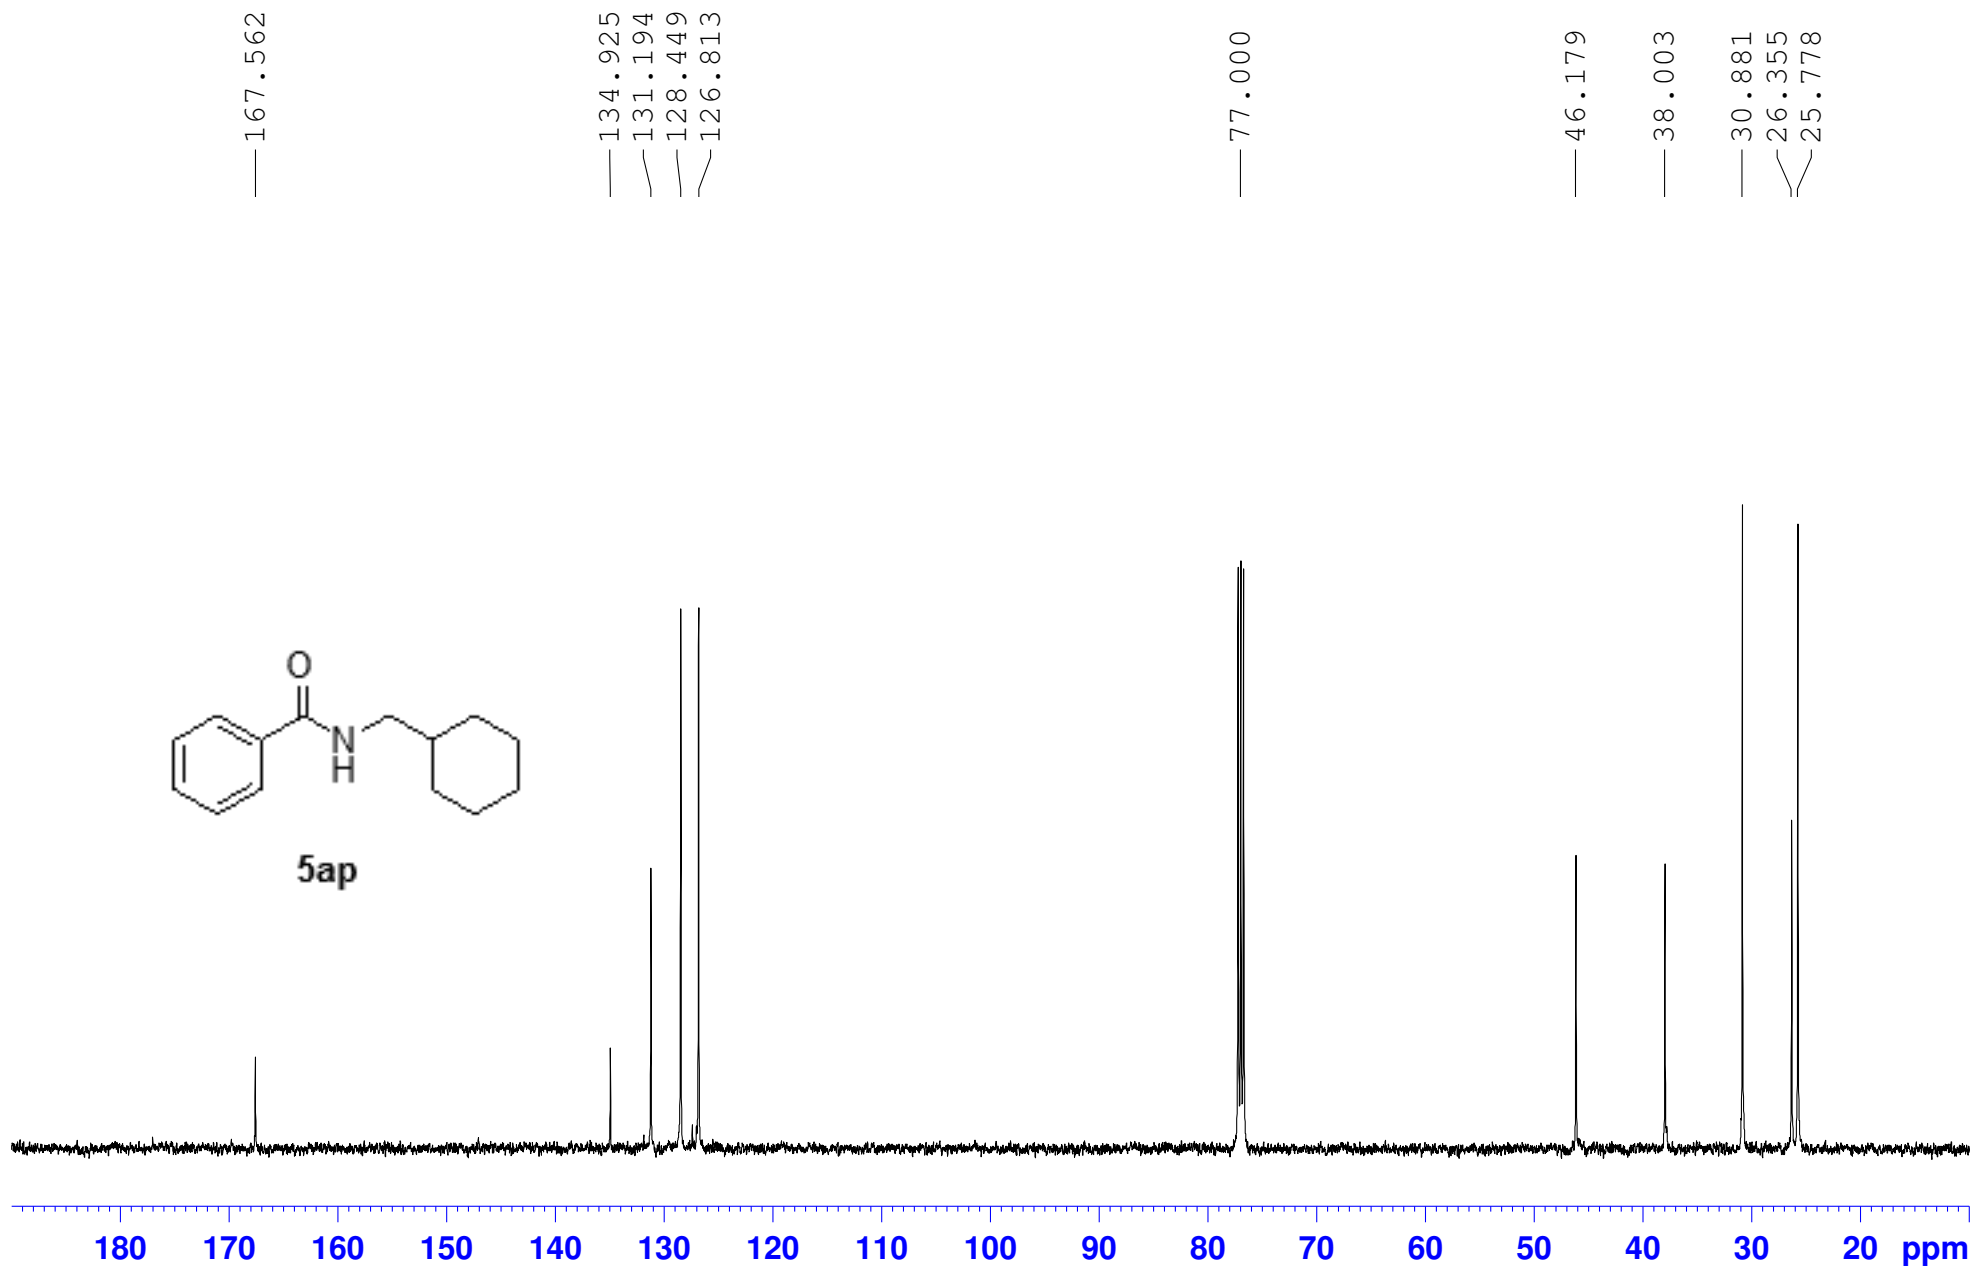

N-Benzyl-4-methyl-benzamide  
Proton CDCl3

7.697  
7.680  
7.359  
7.351  
7.321  
7.313  
7.304  
7.295  
7.287  
7.278  
7.260  
7.235  
7.219  
6.371

4.649  
4.638

2.391

0.000

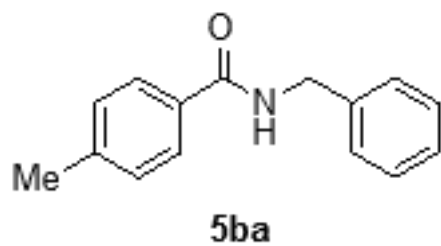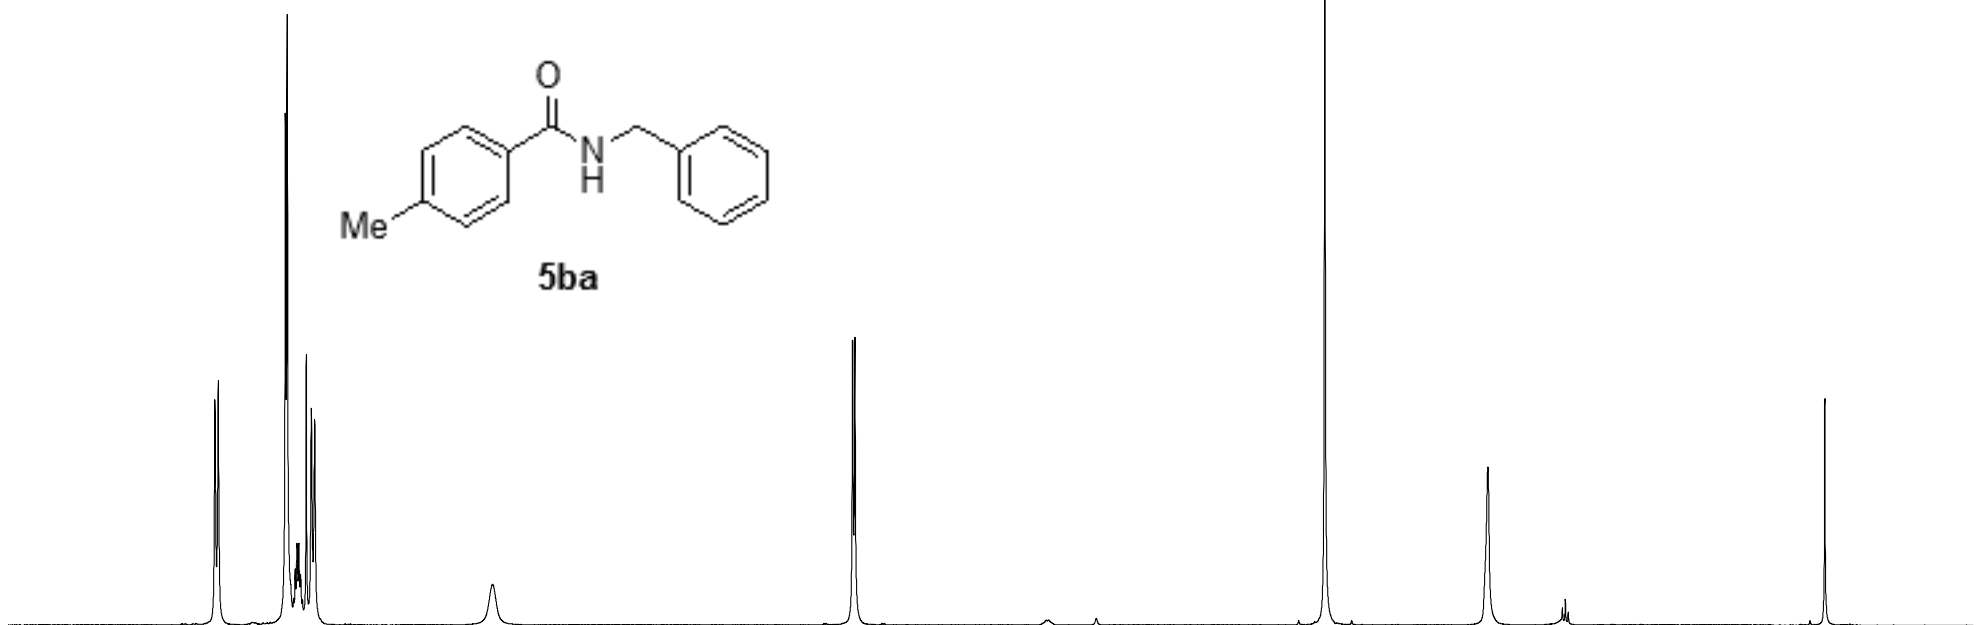

8.5 8.0 7.5 7.0 6.5 6.0 5.5 5.0 4.5 4.0 3.5 3.0 2.5 2.0 1.5 1.0 0.5 0.0 ppm

2.00  
5.00  
2.00

1.00

2.00

3.00

N-Benzyl-4-methyl-benzamide  
C13CPD CDC13

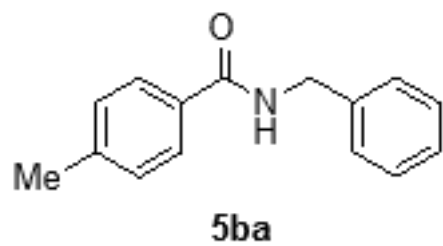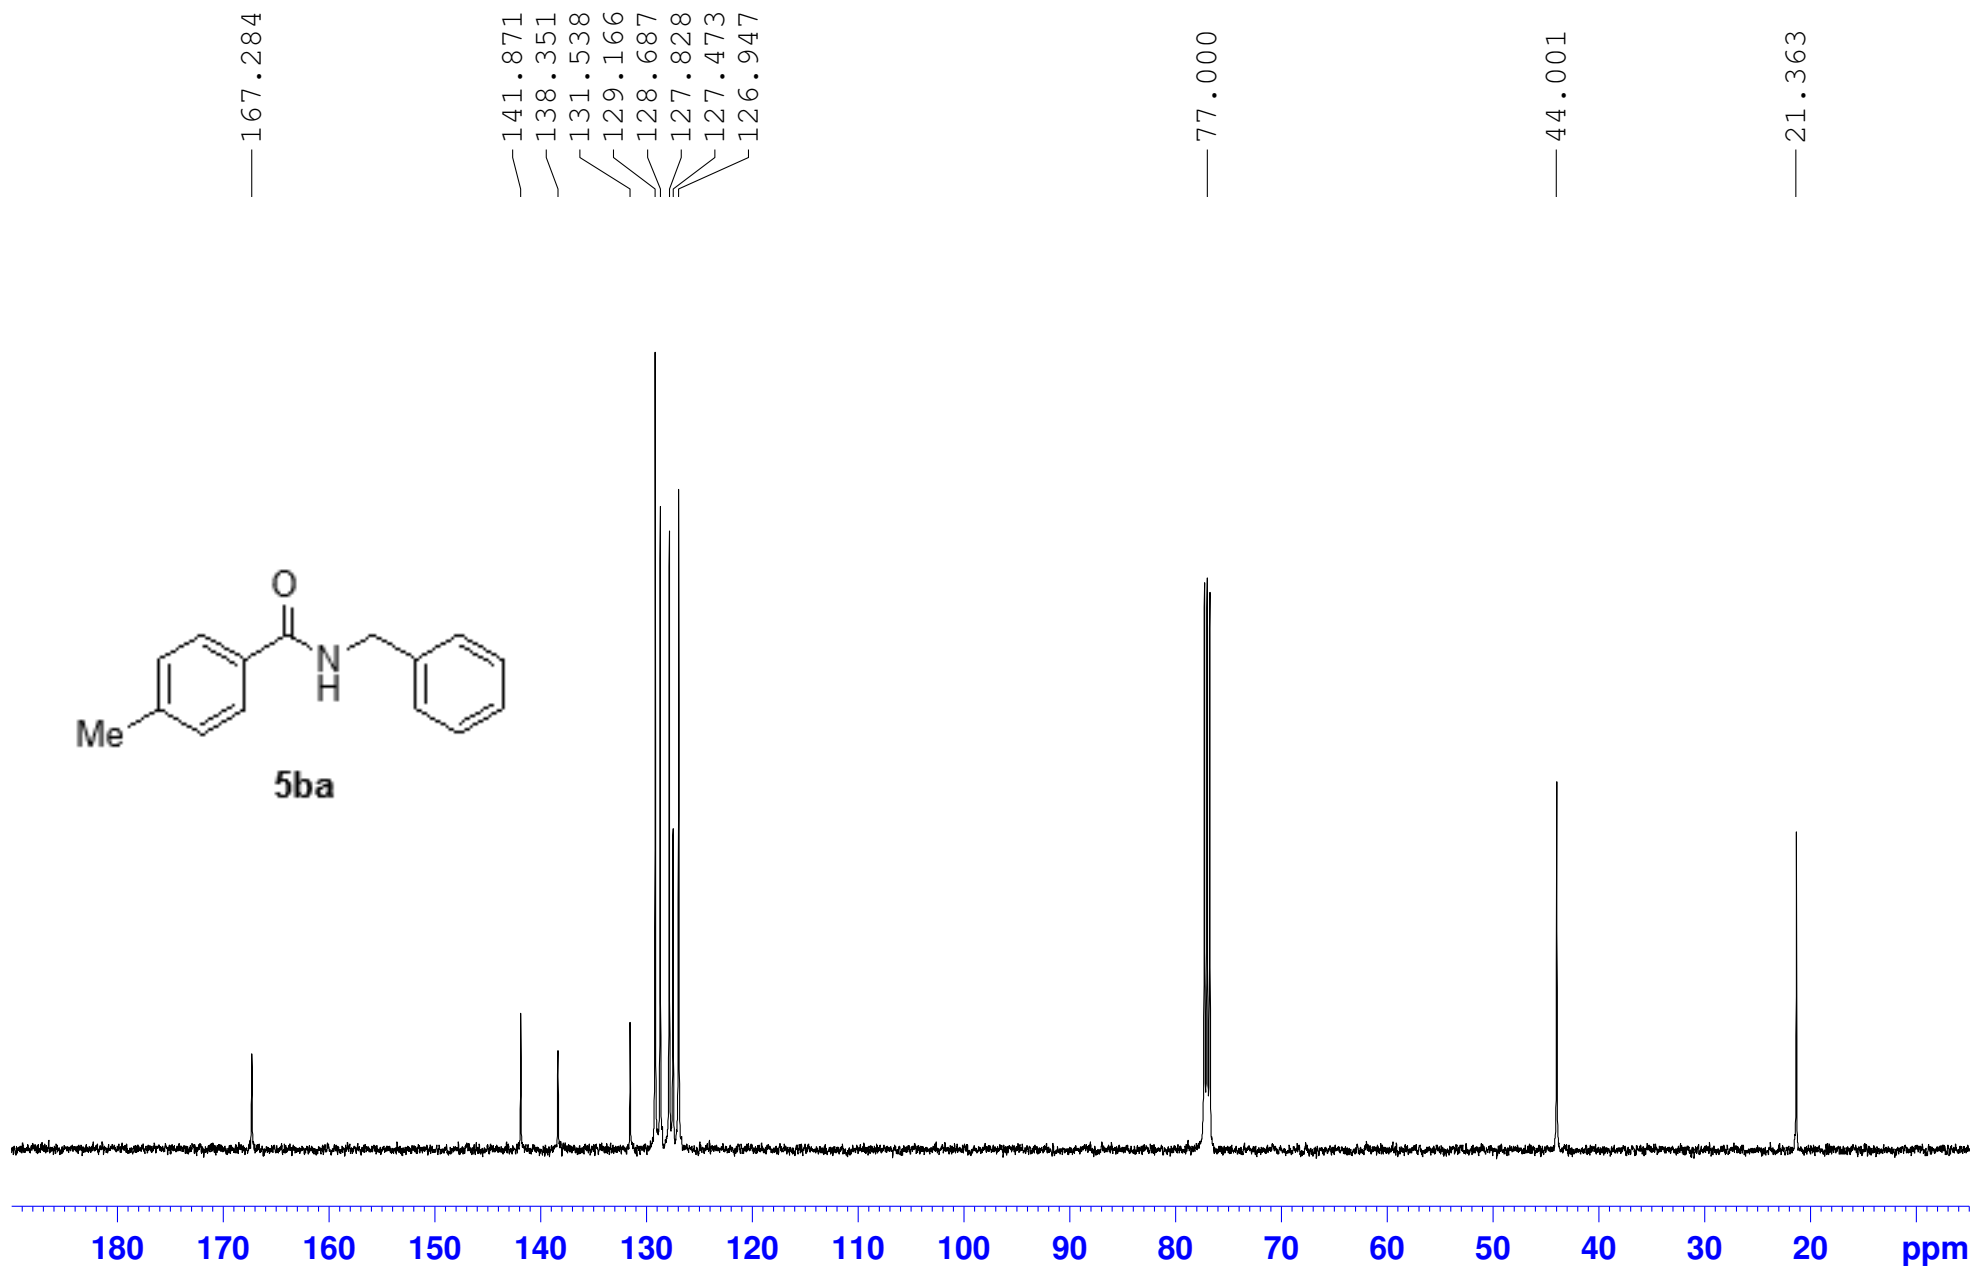

N-benzyl-4-methoxybenzamide  
Proton CDCl<sub>3</sub>

7.768  
7.750  
7.358  
7.349  
7.318  
7.310  
7.302  
7.293  
7.285  
7.276  
7.260  
6.925  
6.908  
6.336

4.641  
4.630

3.843

0.000

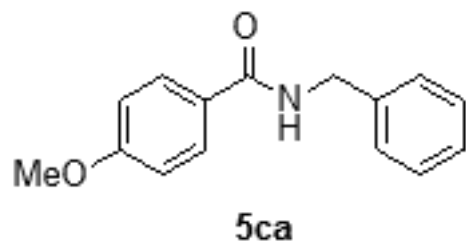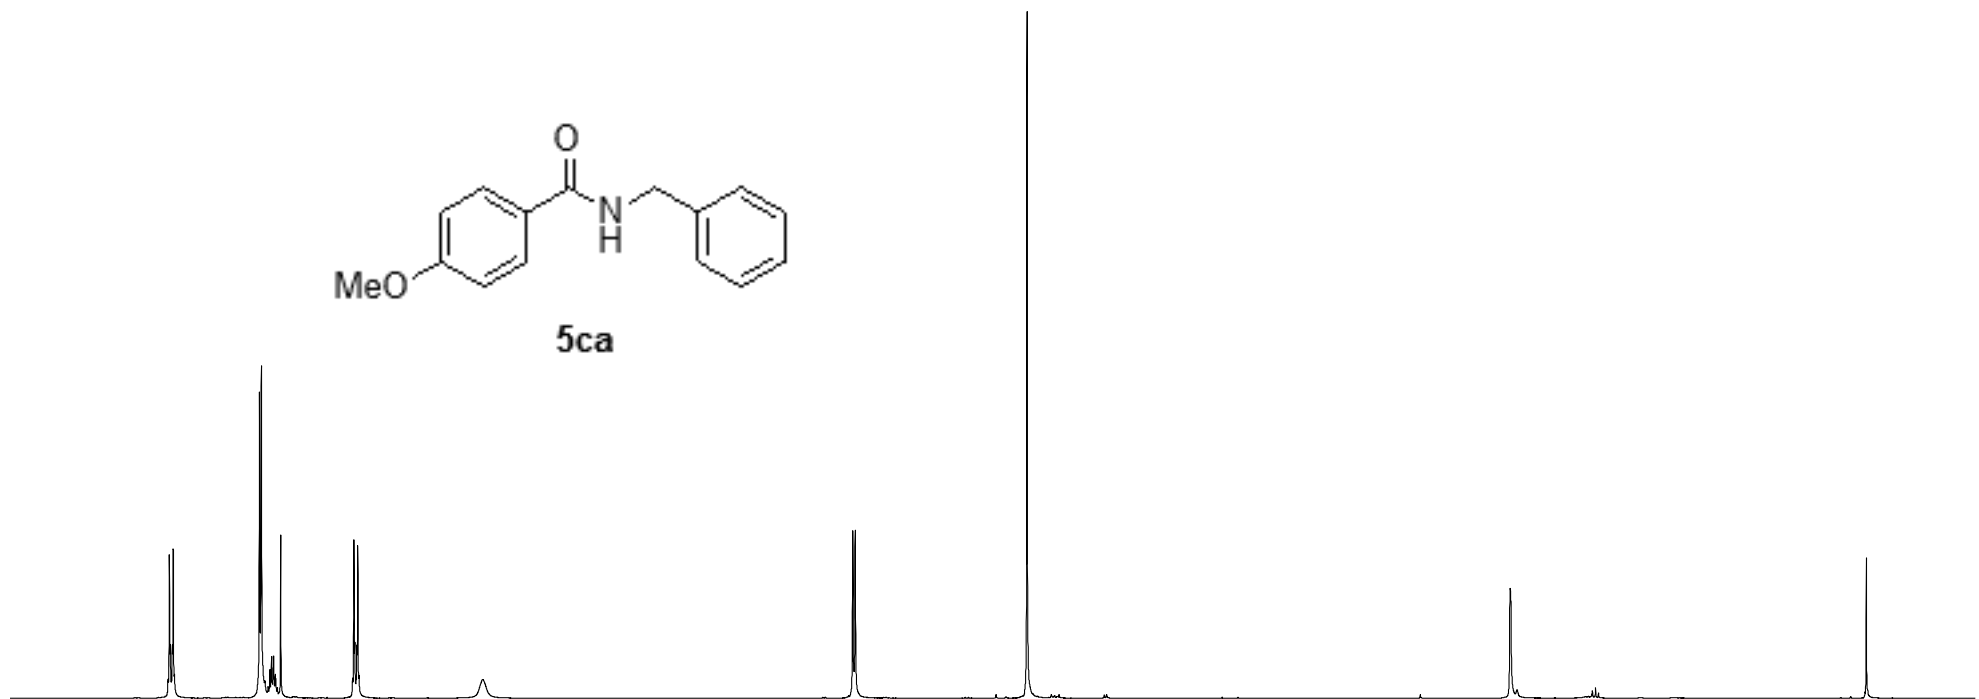

8.0 7.5 7.0 6.5 6.0 5.5 5.0 4.5 4.0 3.5 3.0 2.5 2.0 1.5 1.0 0.5 0.0 ppm

2.00

3.88

1.03

2.00

1.00

2.00

3.00

N-benzyl-4-methoxybenzamide  
C13CPD CDC13

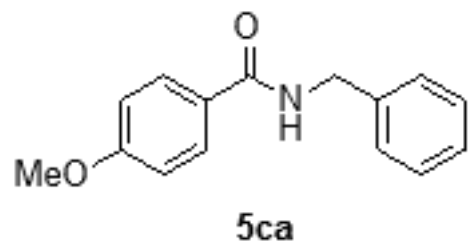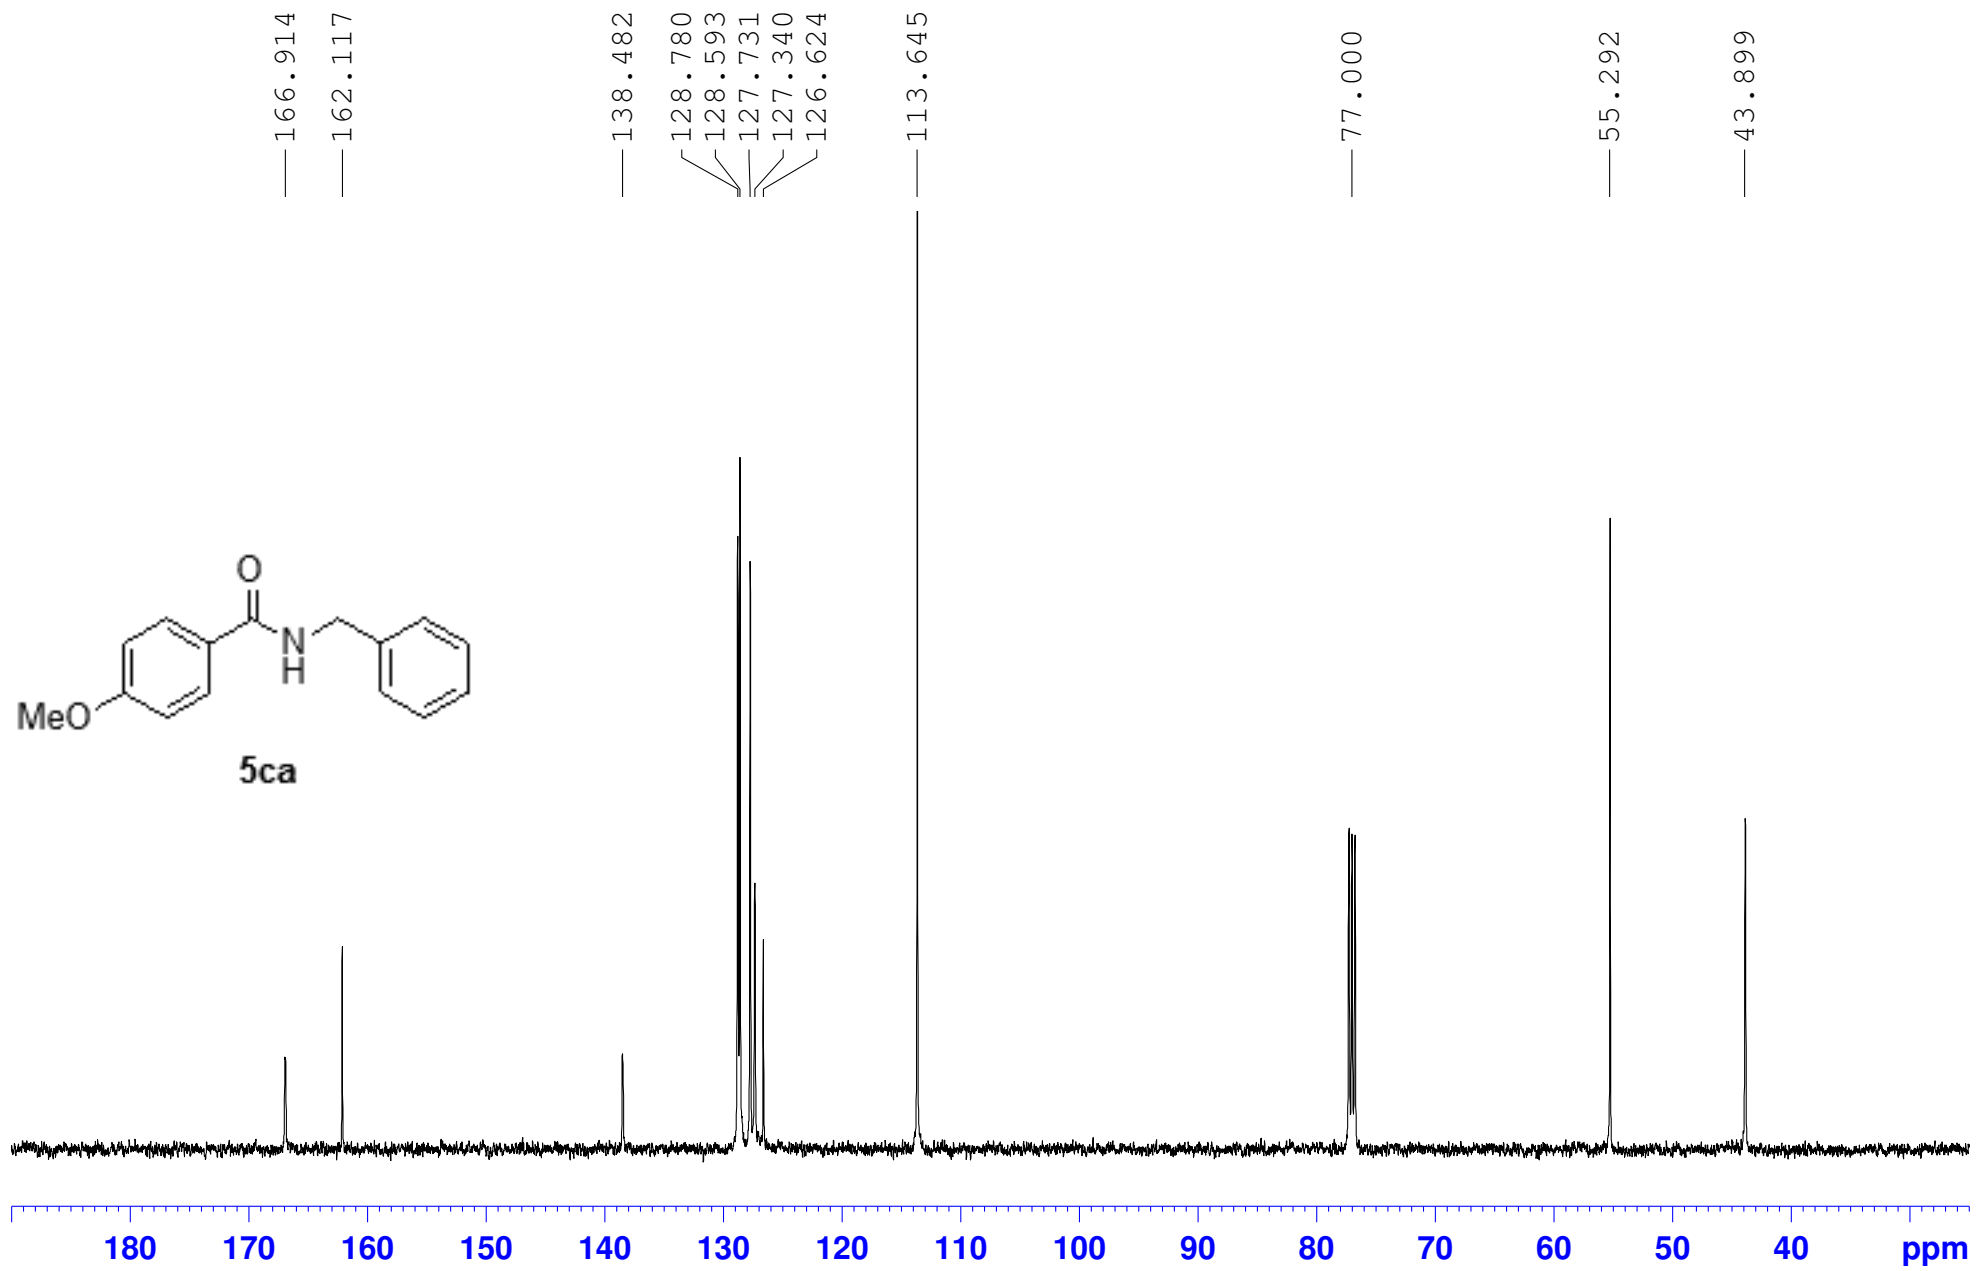

N-Benzyl-4-fluoro-benzamide  
Proton CDCl<sub>3</sub>

7.800  
7.786  
7.365  
7.361  
7.354  
7.344  
7.332  
7.323  
7.317  
7.312  
7.307  
7.301  
7.296  
7.288  
7.260  
7.121  
7.104  
7.087  
6.345

4.644  
4.633

0.000

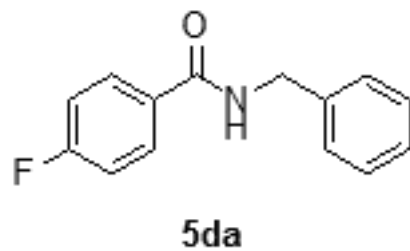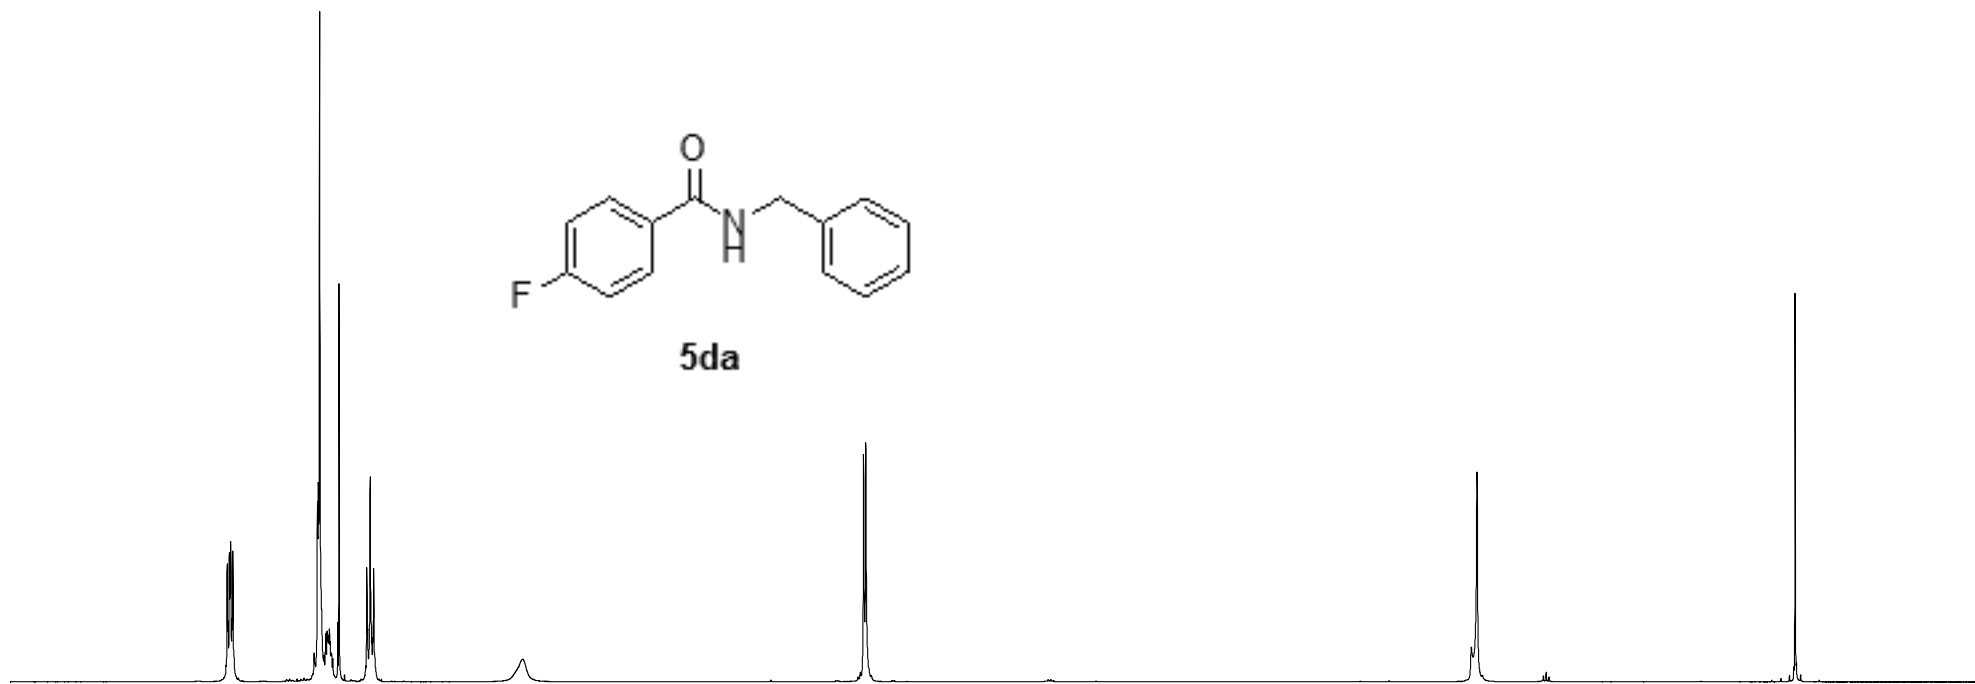

8.5 8.0 7.5 7.0 6.5 6.0 5.5 5.0 4.5 4.0 3.5 3.0 2.5 2.0 1.5 1.0 0.5 0.0 ppm

2.01

5.00

2.00

1.01

2.00

N-Benzyl-4-fluoro-benzamide  
C13CPD CDC13

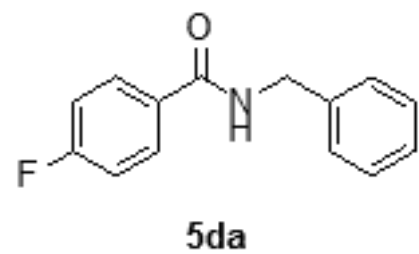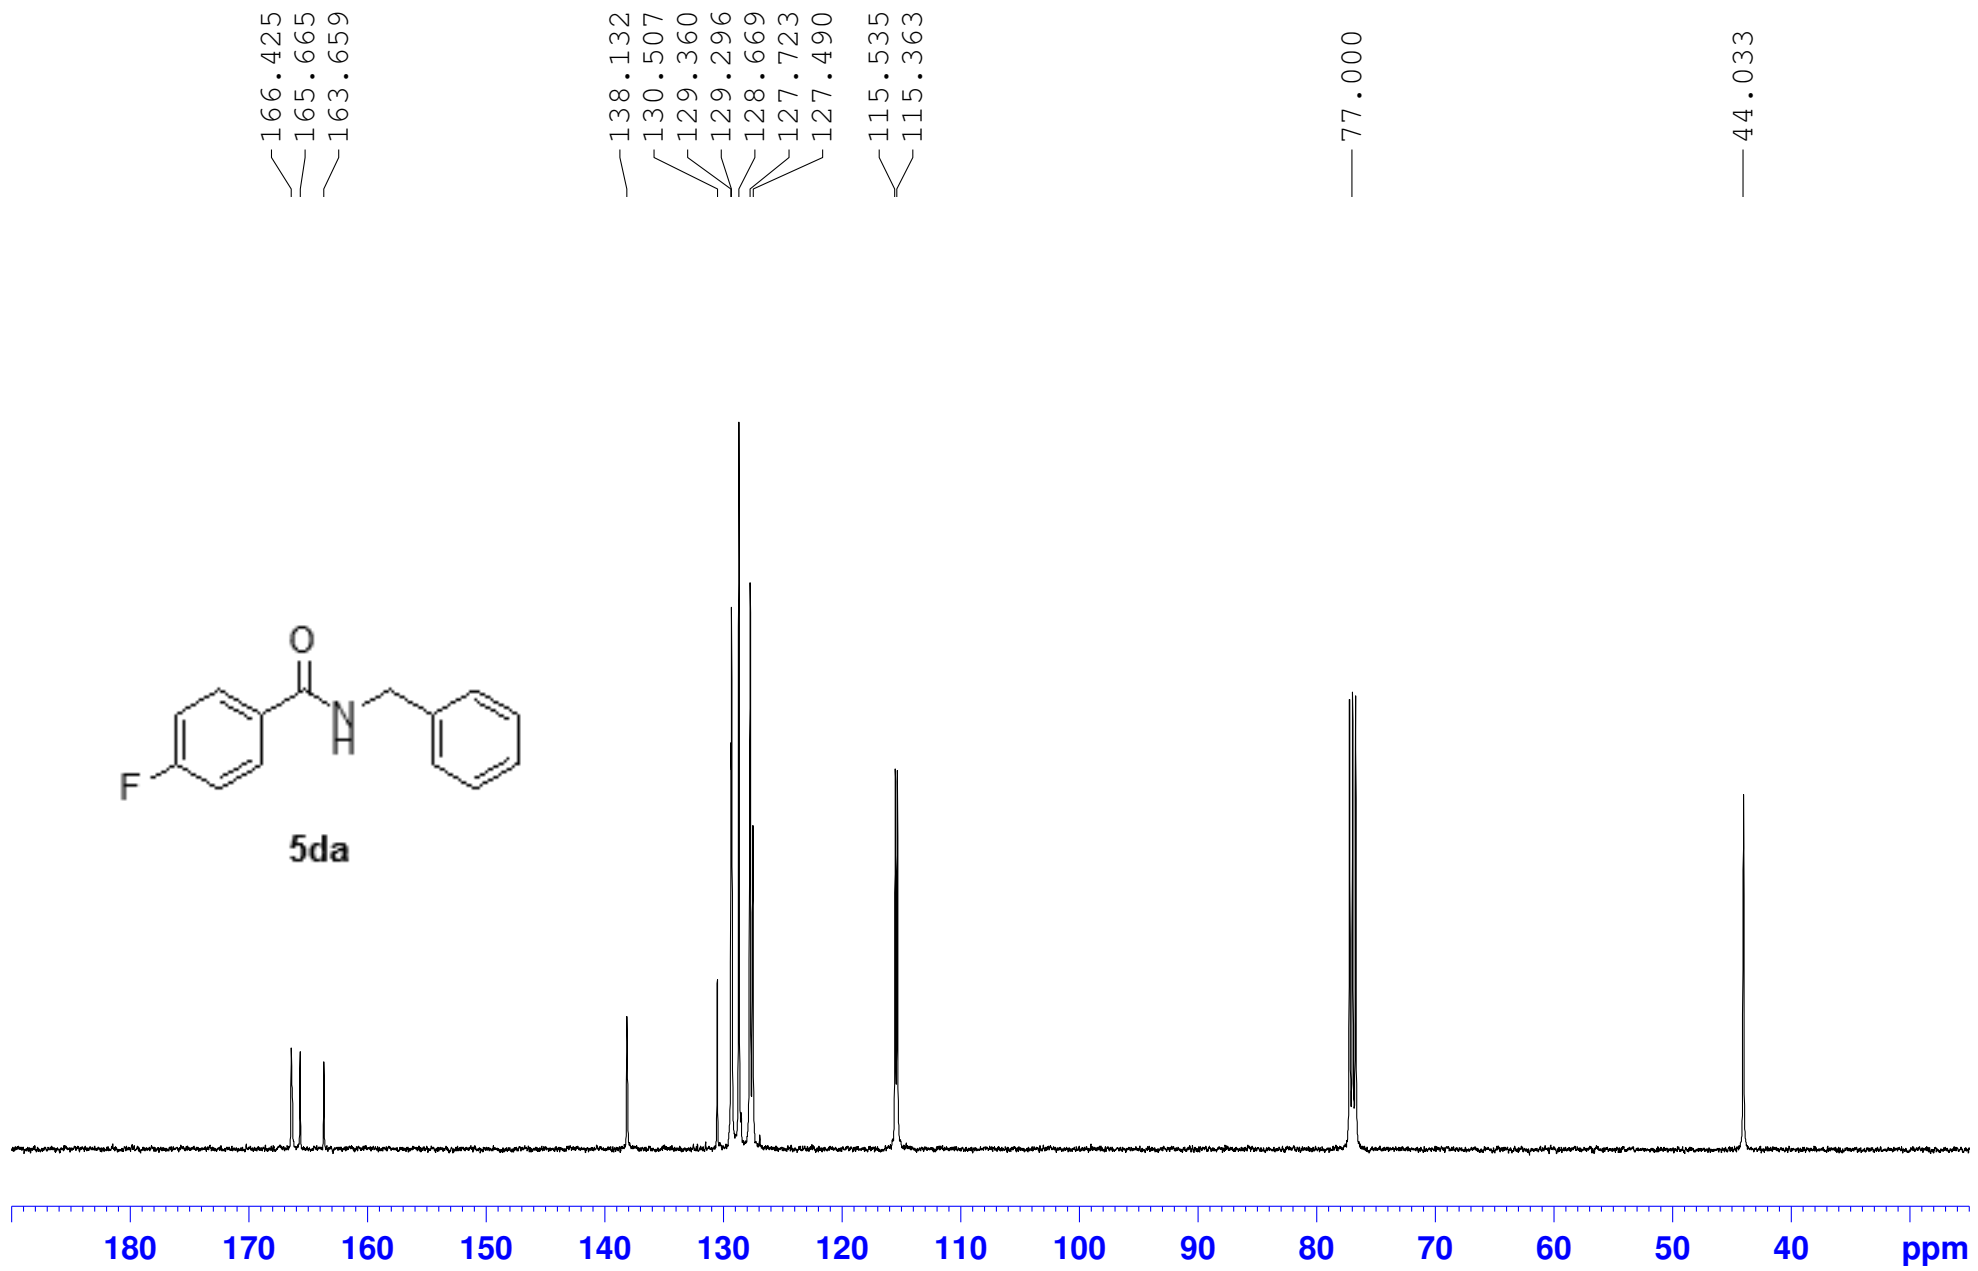



N-benzyl-4-chlorobenzamide  
Proton CDCl<sub>3</sub>

7.735  
7.718  
7.408  
7.391  
7.378  
7.363  
7.350  
7.338  
7.305  
7.298  
7.293  
7.288  
7.281  
7.320  
7.259  
6.375

4.639  
4.628

0.000

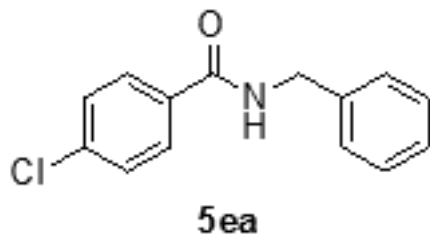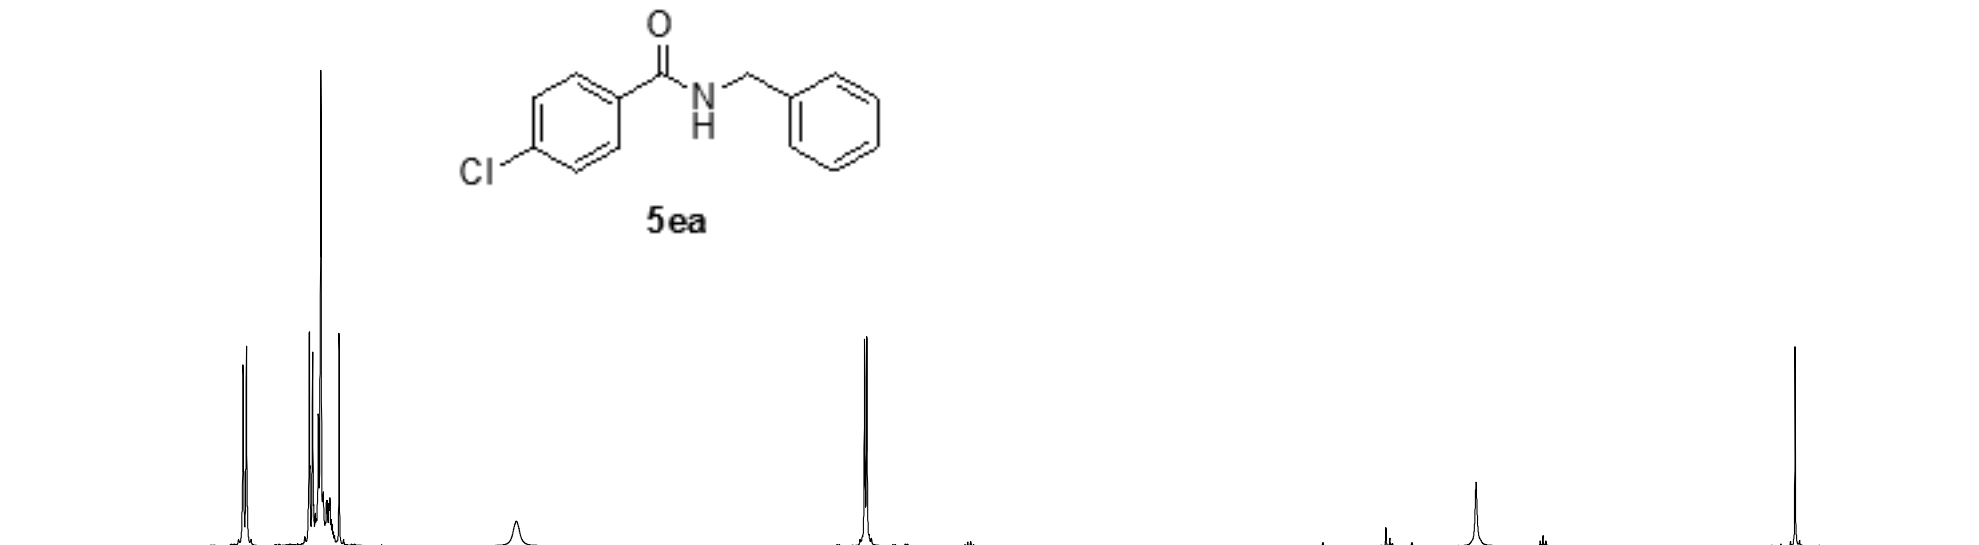

8.5 8.0 7.5 7.0 6.5 6.0 5.5 5.0 4.5 4.0 3.5 3.0 2.5 2.0 1.5 1.0 0.5 0.0 ppm

2.00  
1.99  
3.94  
1.00

1.00

2.00

N-benzyl-4-chlorobenzamide  
C13CPD CDC13

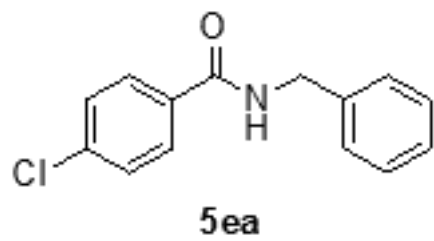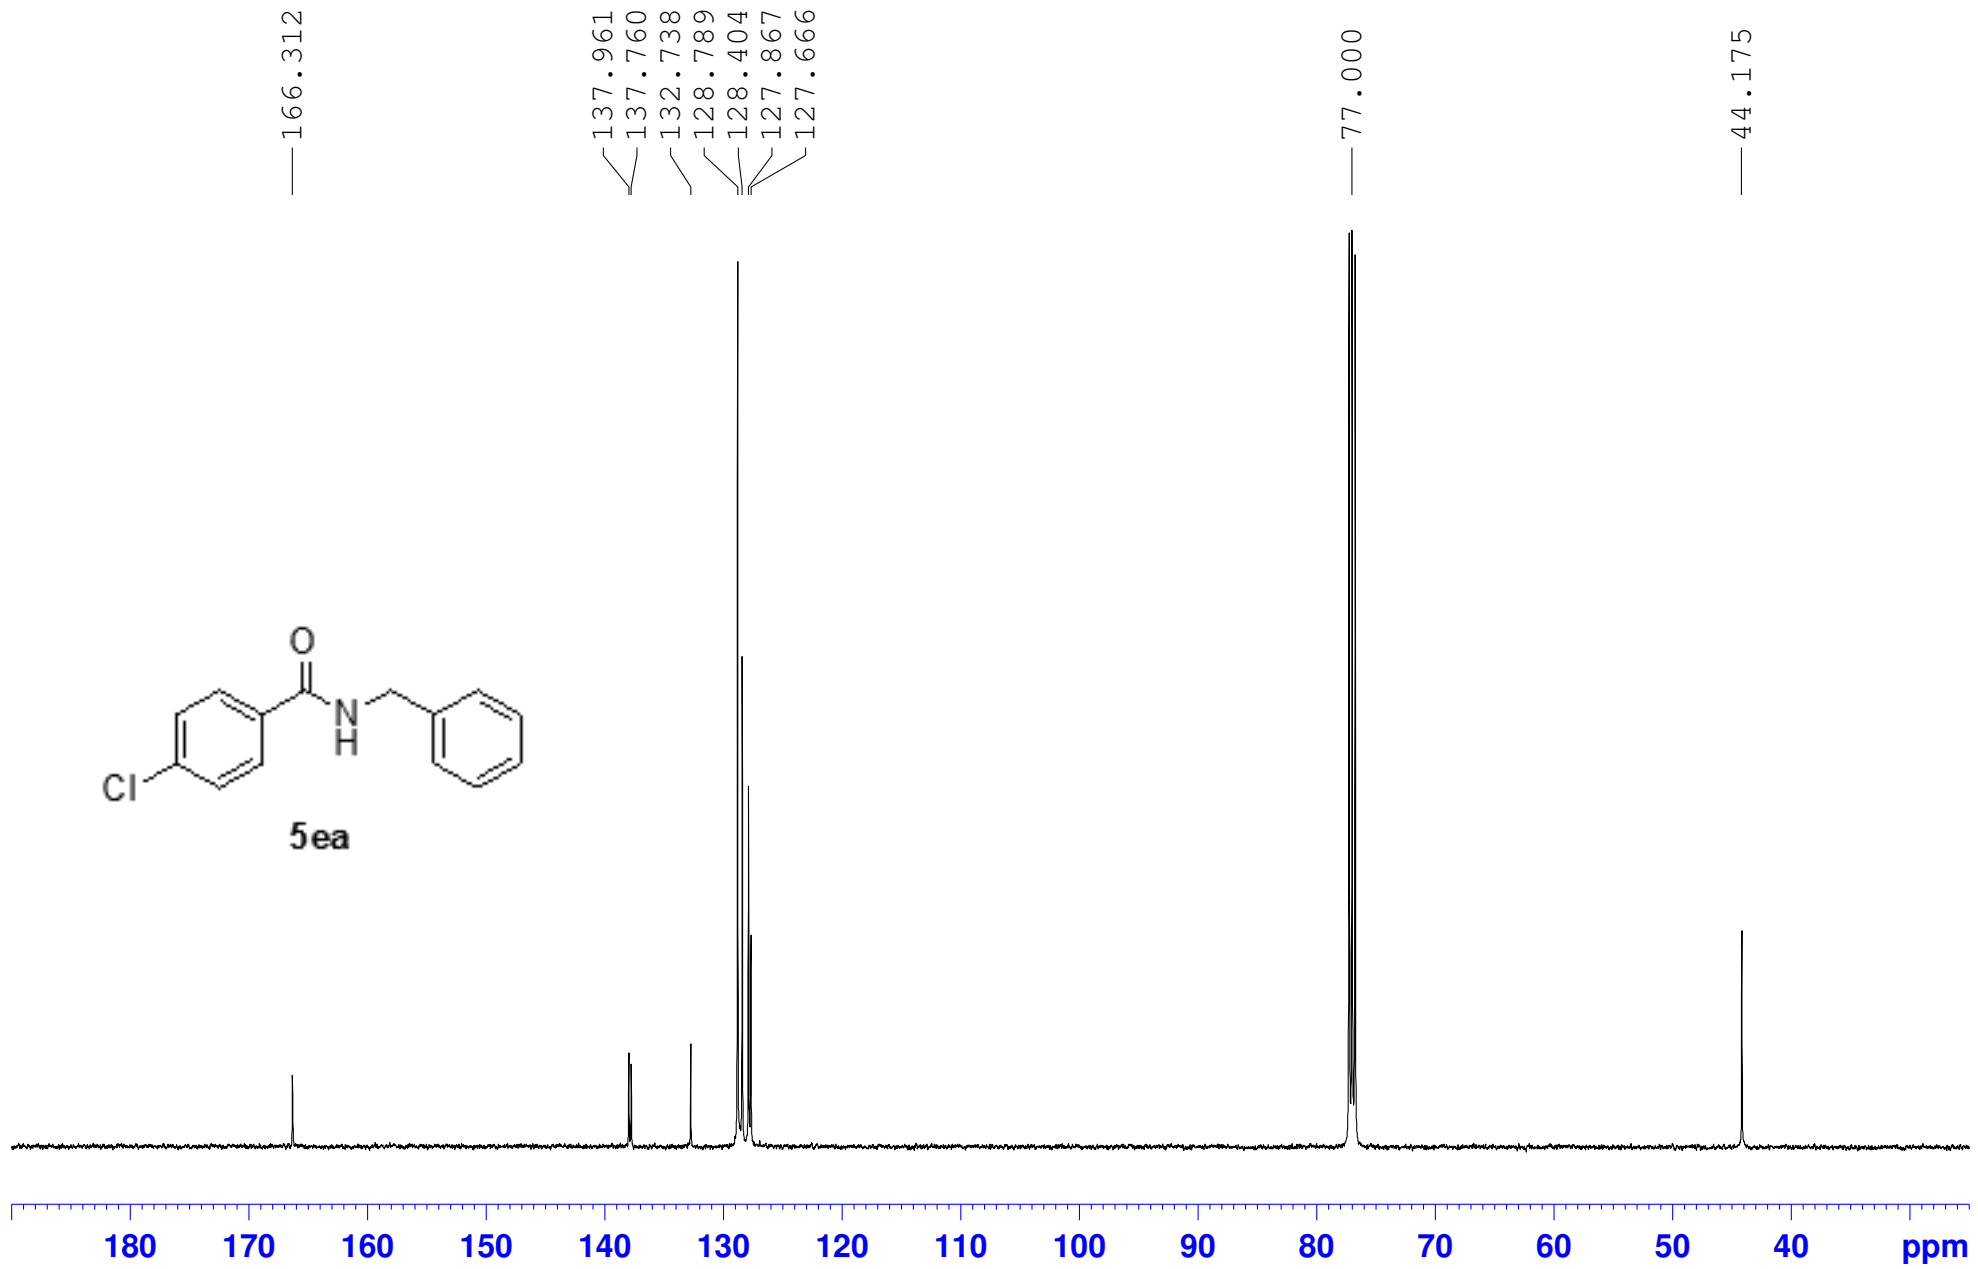

N-benzyl-3,4-dichlorobenzamide  
Proton CDCl<sub>3</sub>

7.885  
7.882  
7.613  
7.596  
7.513  
7.496  
7.384  
7.370  
7.355  
7.349  
7.334  
7.316  
7.260  
— 6.359

4.633  
4.622

0.000

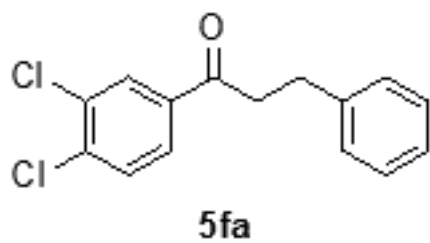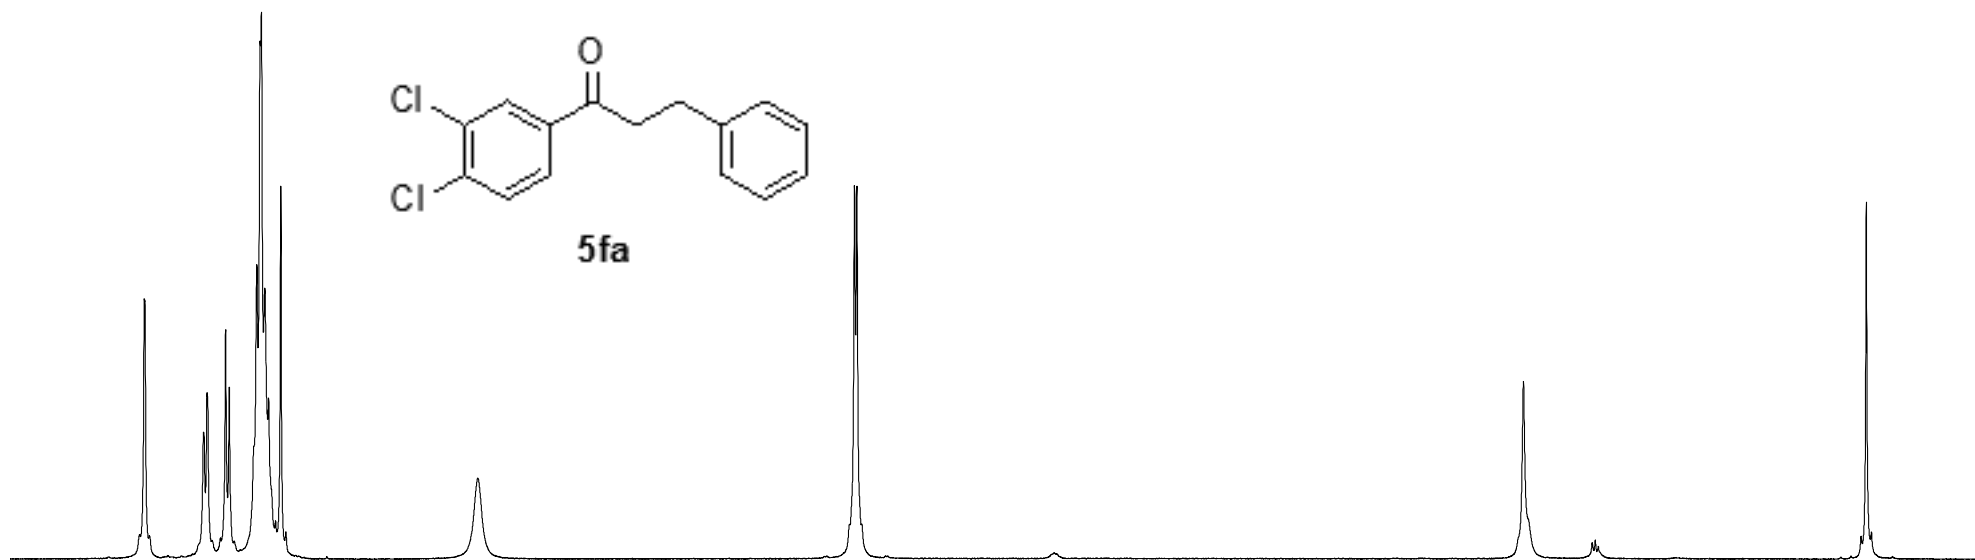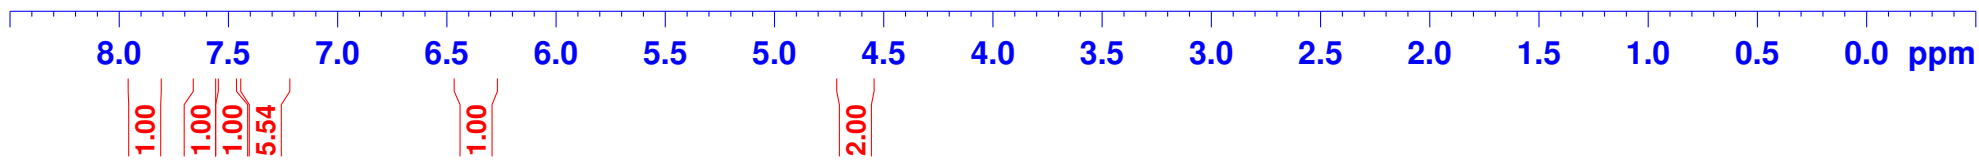

N-benzyl-3,4-dichlorobenzamide  
C13CPD CDC13

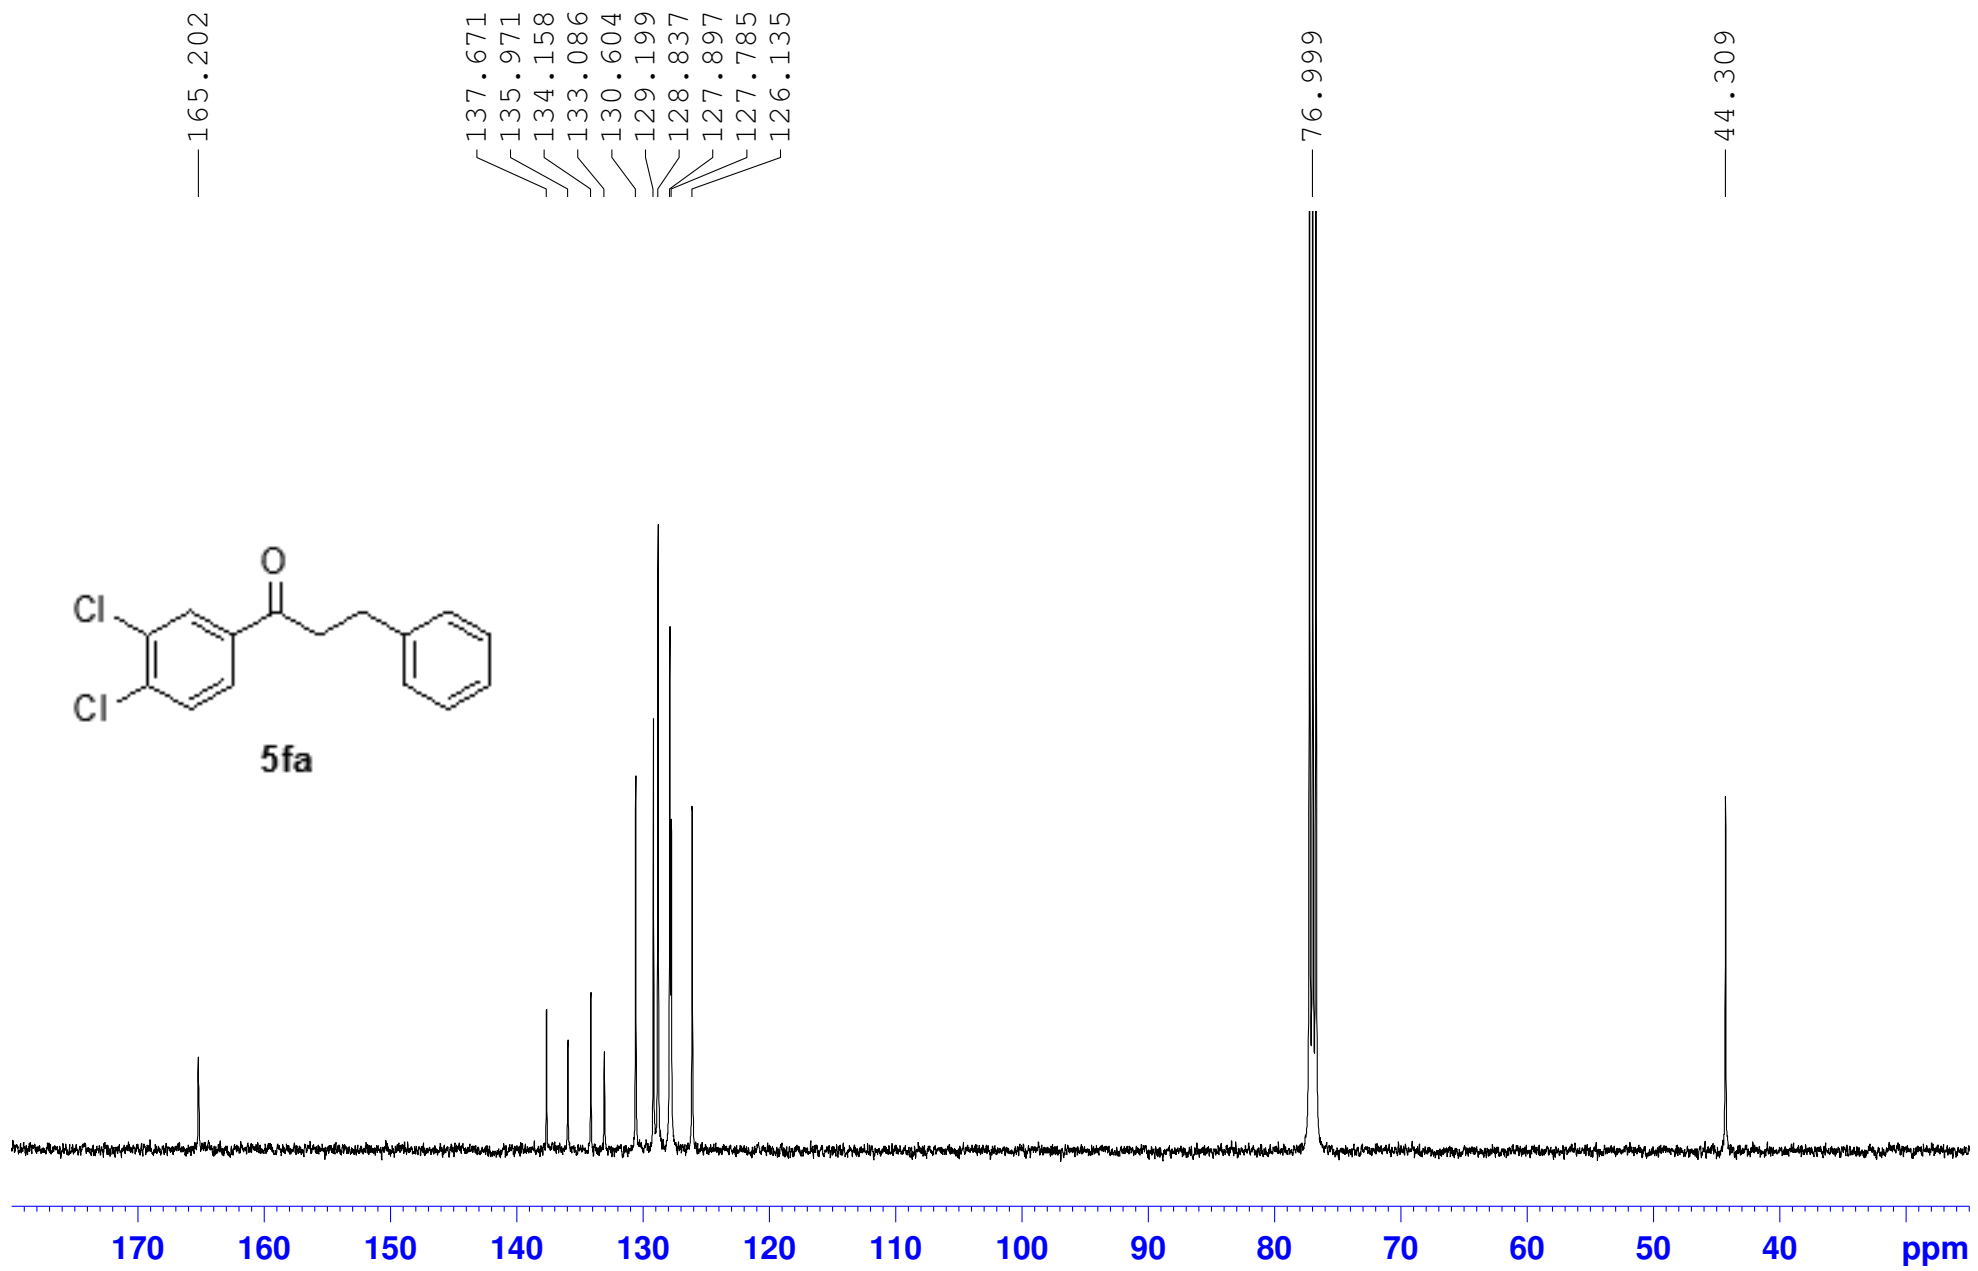

N-benzyl-3-bromobenzamide  
Proton CDCl3

7.928  
7.711  
7.697  
7.633  
7.617  
7.353  
7.321  
7.305  
7.285  
7.262

— 6.430

4.636  
4.626

— 0.000

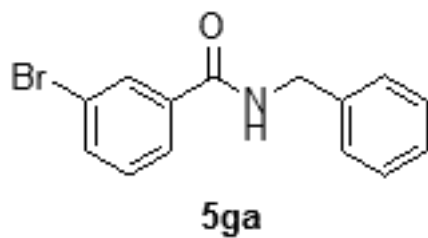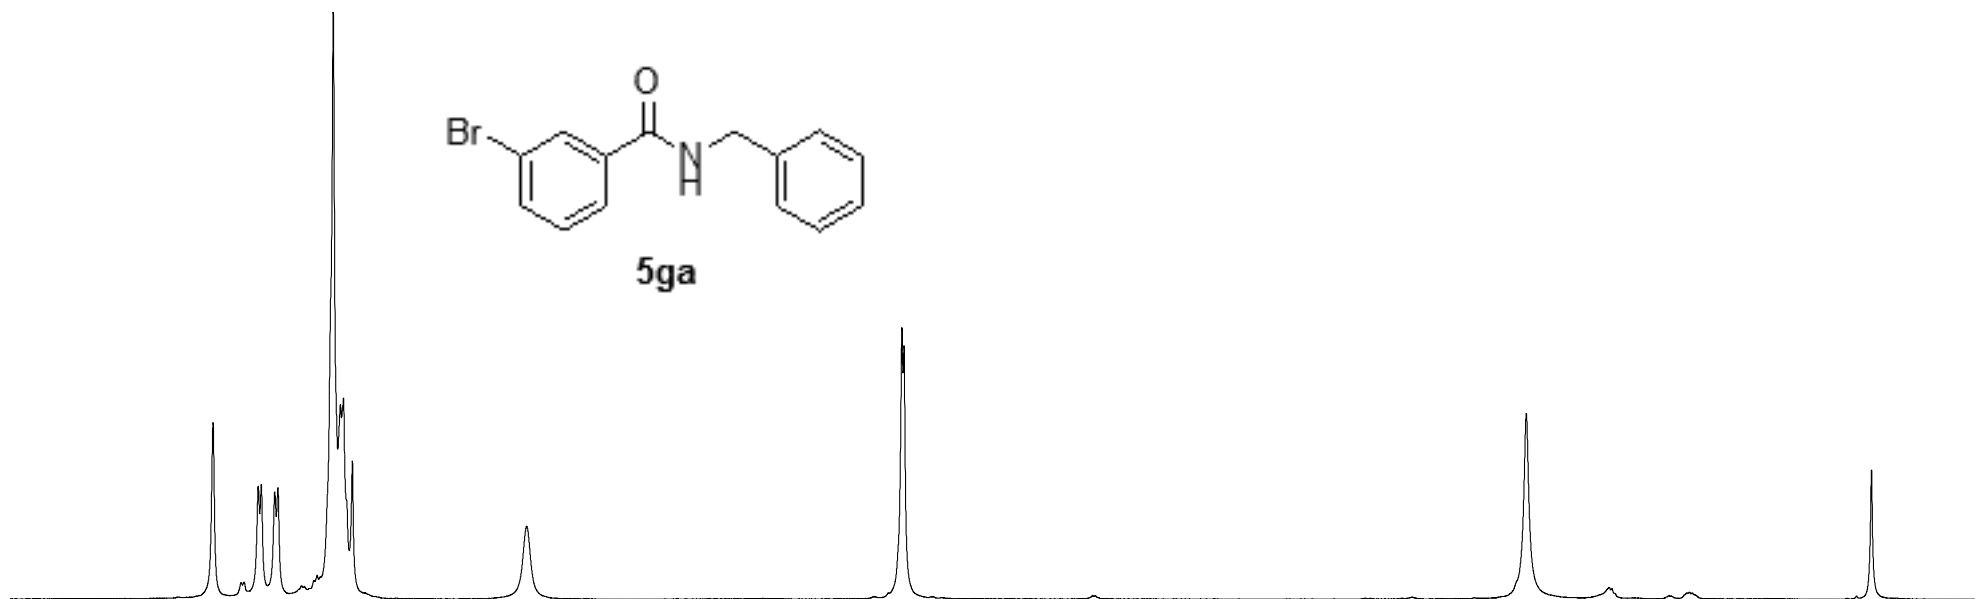

8.5 8.0 7.5 7.0 6.5 6.0 5.5 5.0 4.5 4.0 3.5 3.0 2.5 2.0 1.5 1.0 0.5 ppm

1.00  
1.01  
1.00  
6.54

1.00

2.00

N-benzyl-3-bromobenzamide  
C13CPD CDC13

— 166.052

137.816  
136.225  
134.345  
130.187  
130.012  
128.658  
127.738  
127.526  
125.566  
122.603

— 77.000

— 44.064

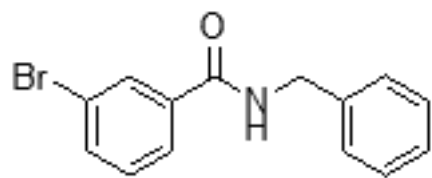

5ga

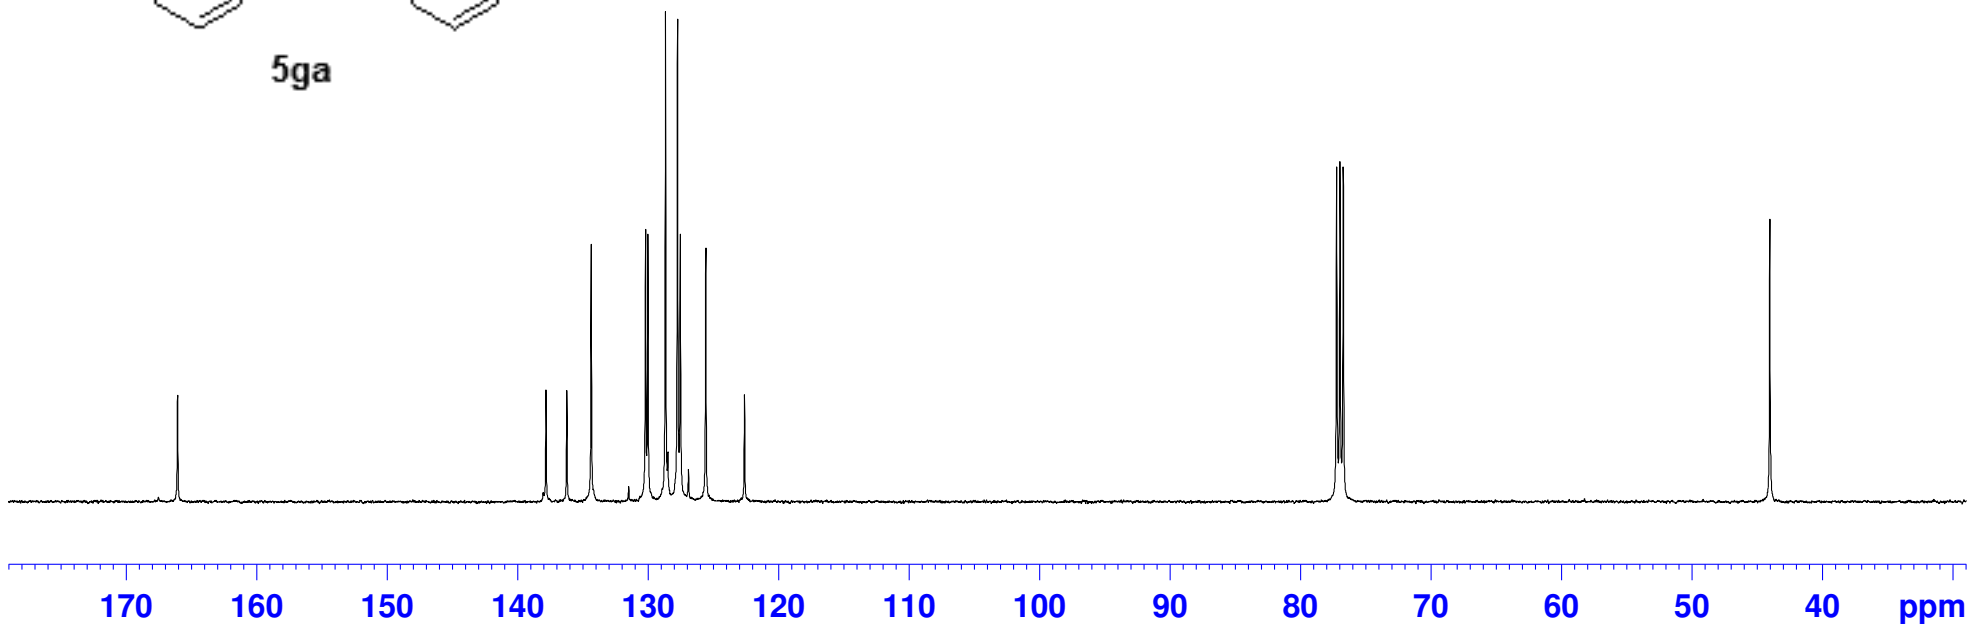

N-benzyl-4-(trifluoromethyl)benzamide  
Proton DMSO-d6

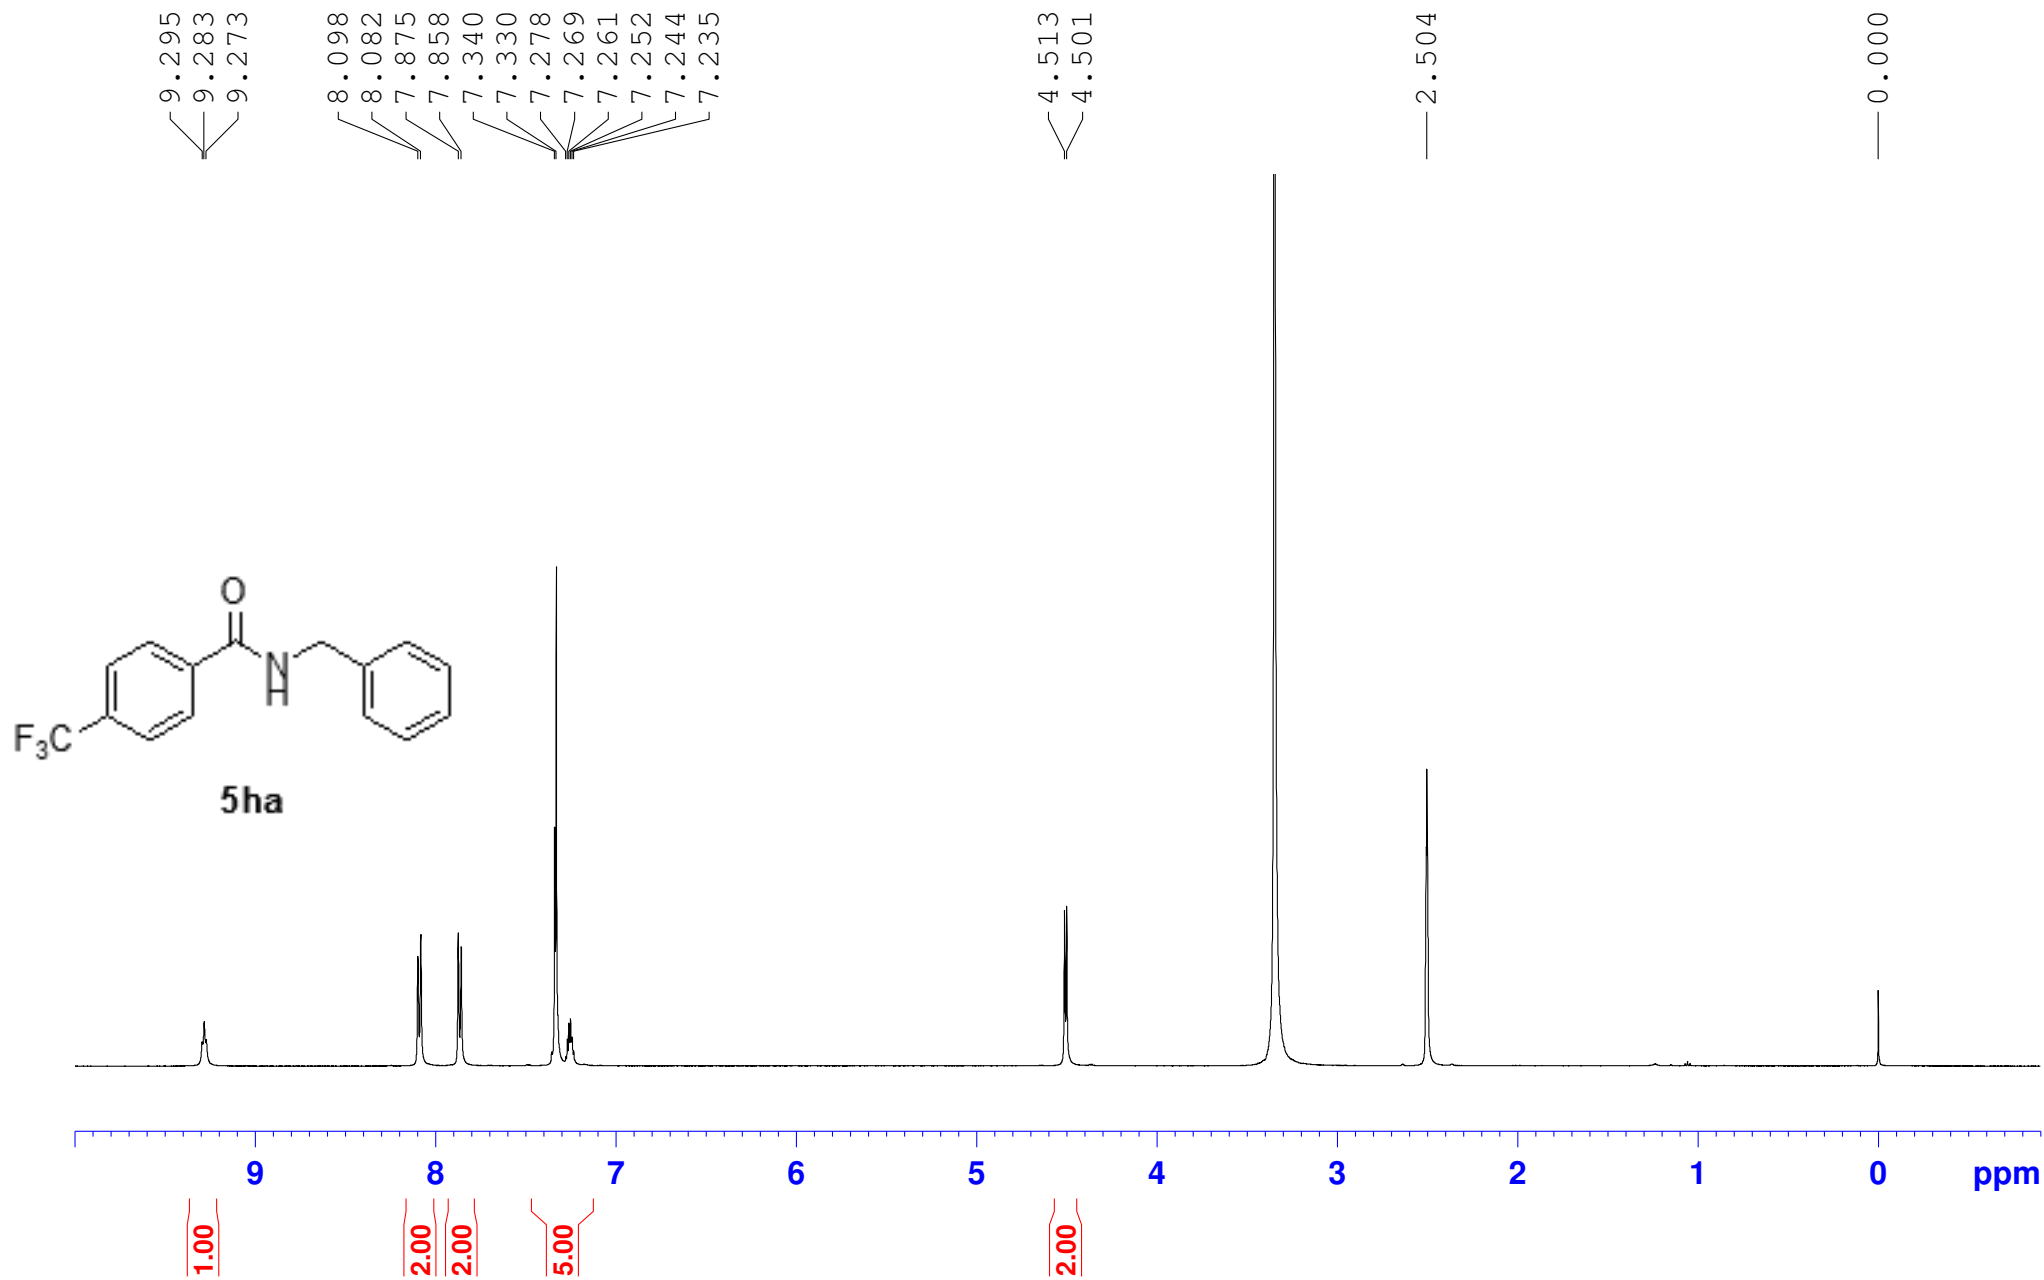

N-benzyl-4-(trifluoromethyl)benzamide  
C13CPD DMSO-d6

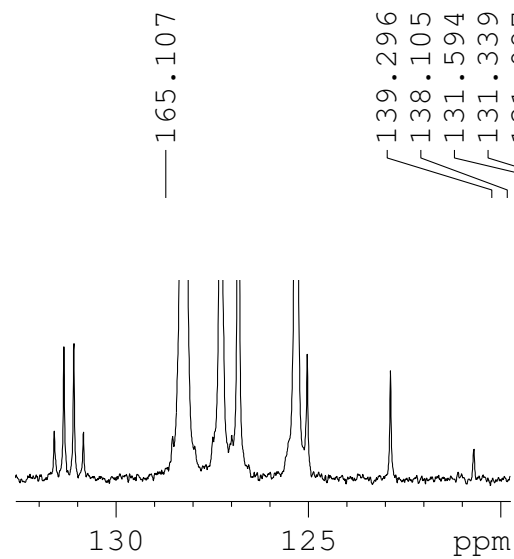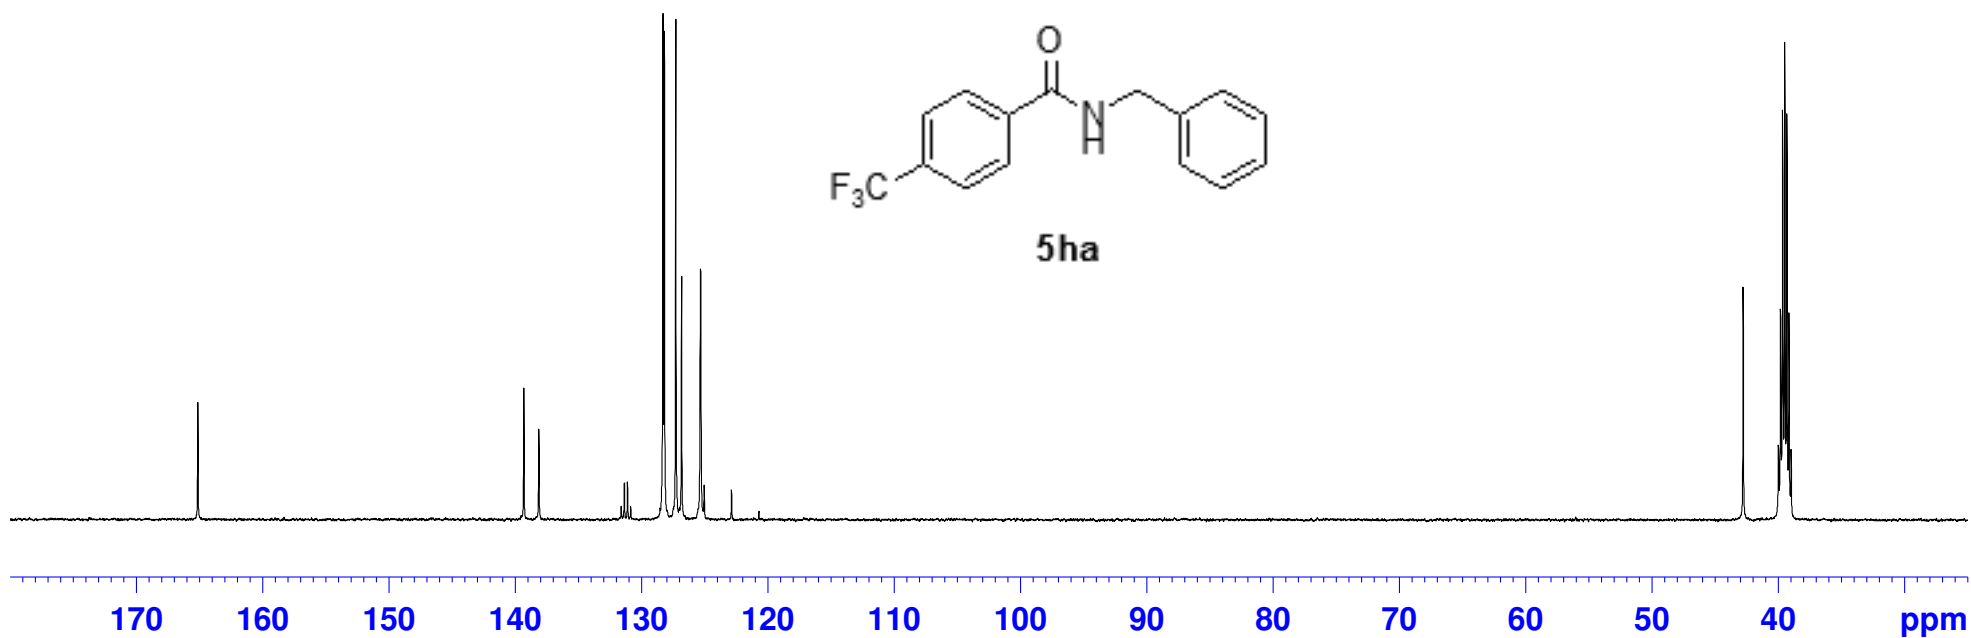



N-benzyl-4-(trifluoromethoxy)benzamide  
Proton CDCl<sub>3</sub>

7.843  
7.826  
7.381  
7.365  
7.354  
7.326  
7.322  
7.314  
7.309  
7.302  
7.297  
7.292  
7.271  
7.261  
7.255  
6.397

4.650  
4.639

0.000

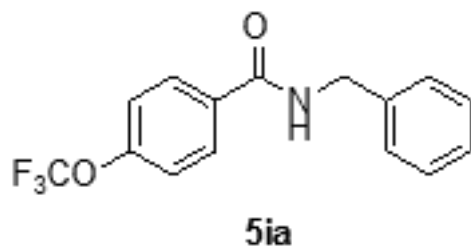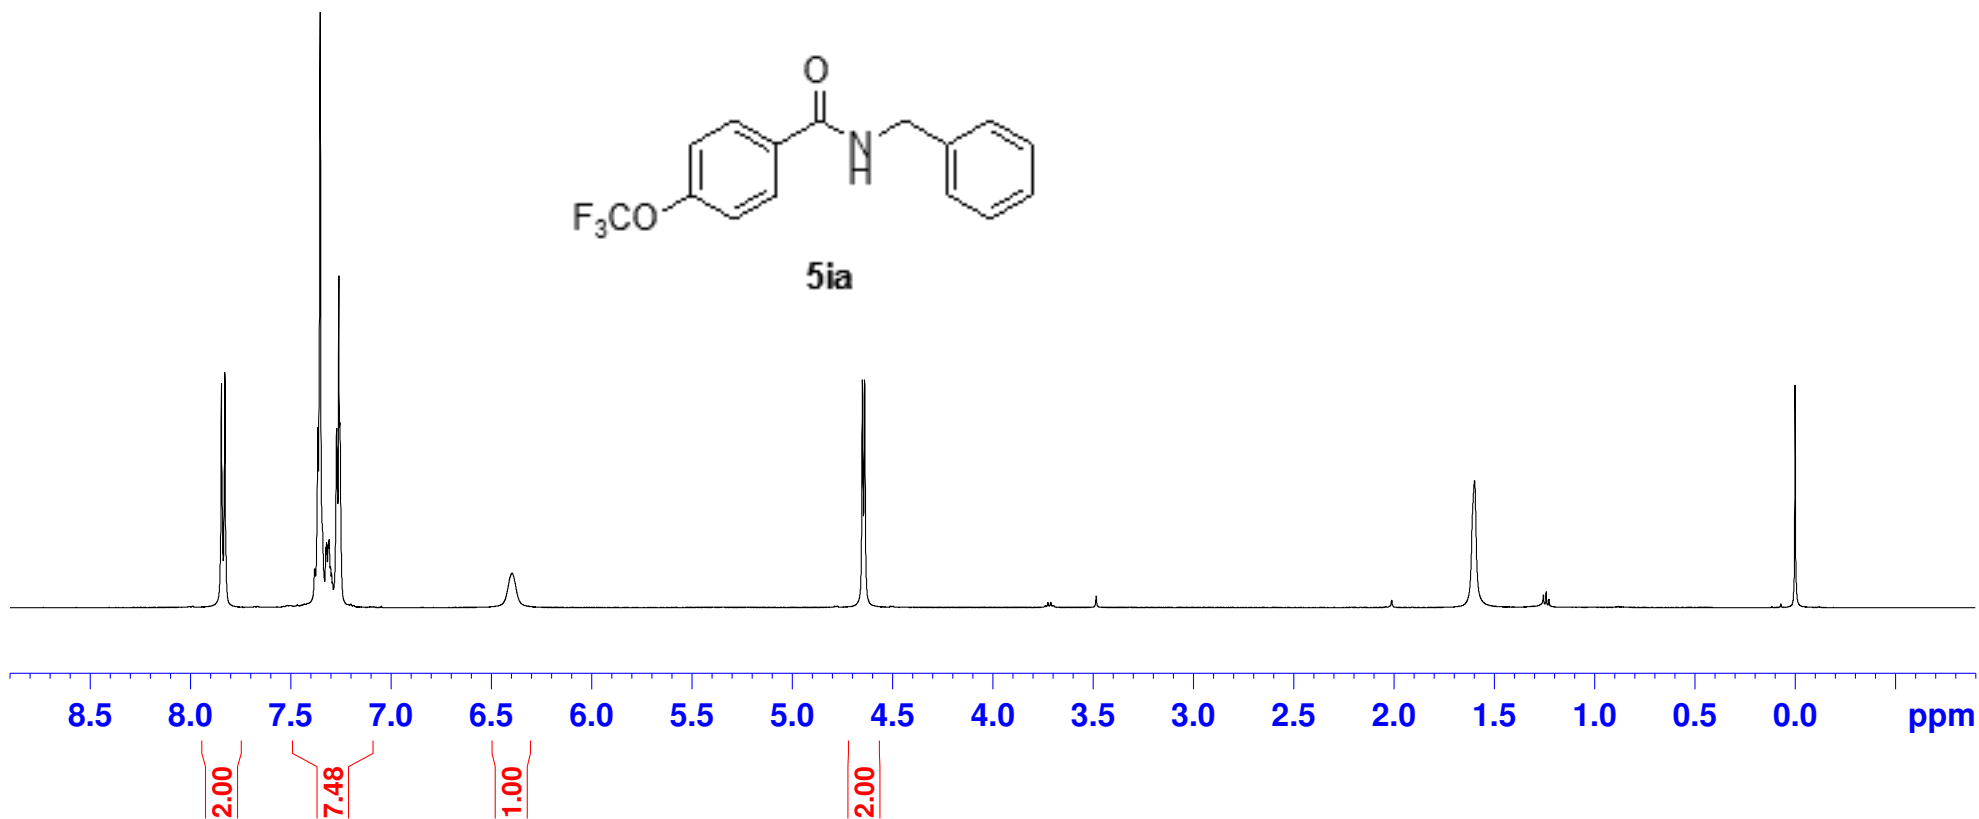

N-benzyl-4-(trifluoromethoxy)benzamide  
C13CPD CDC13

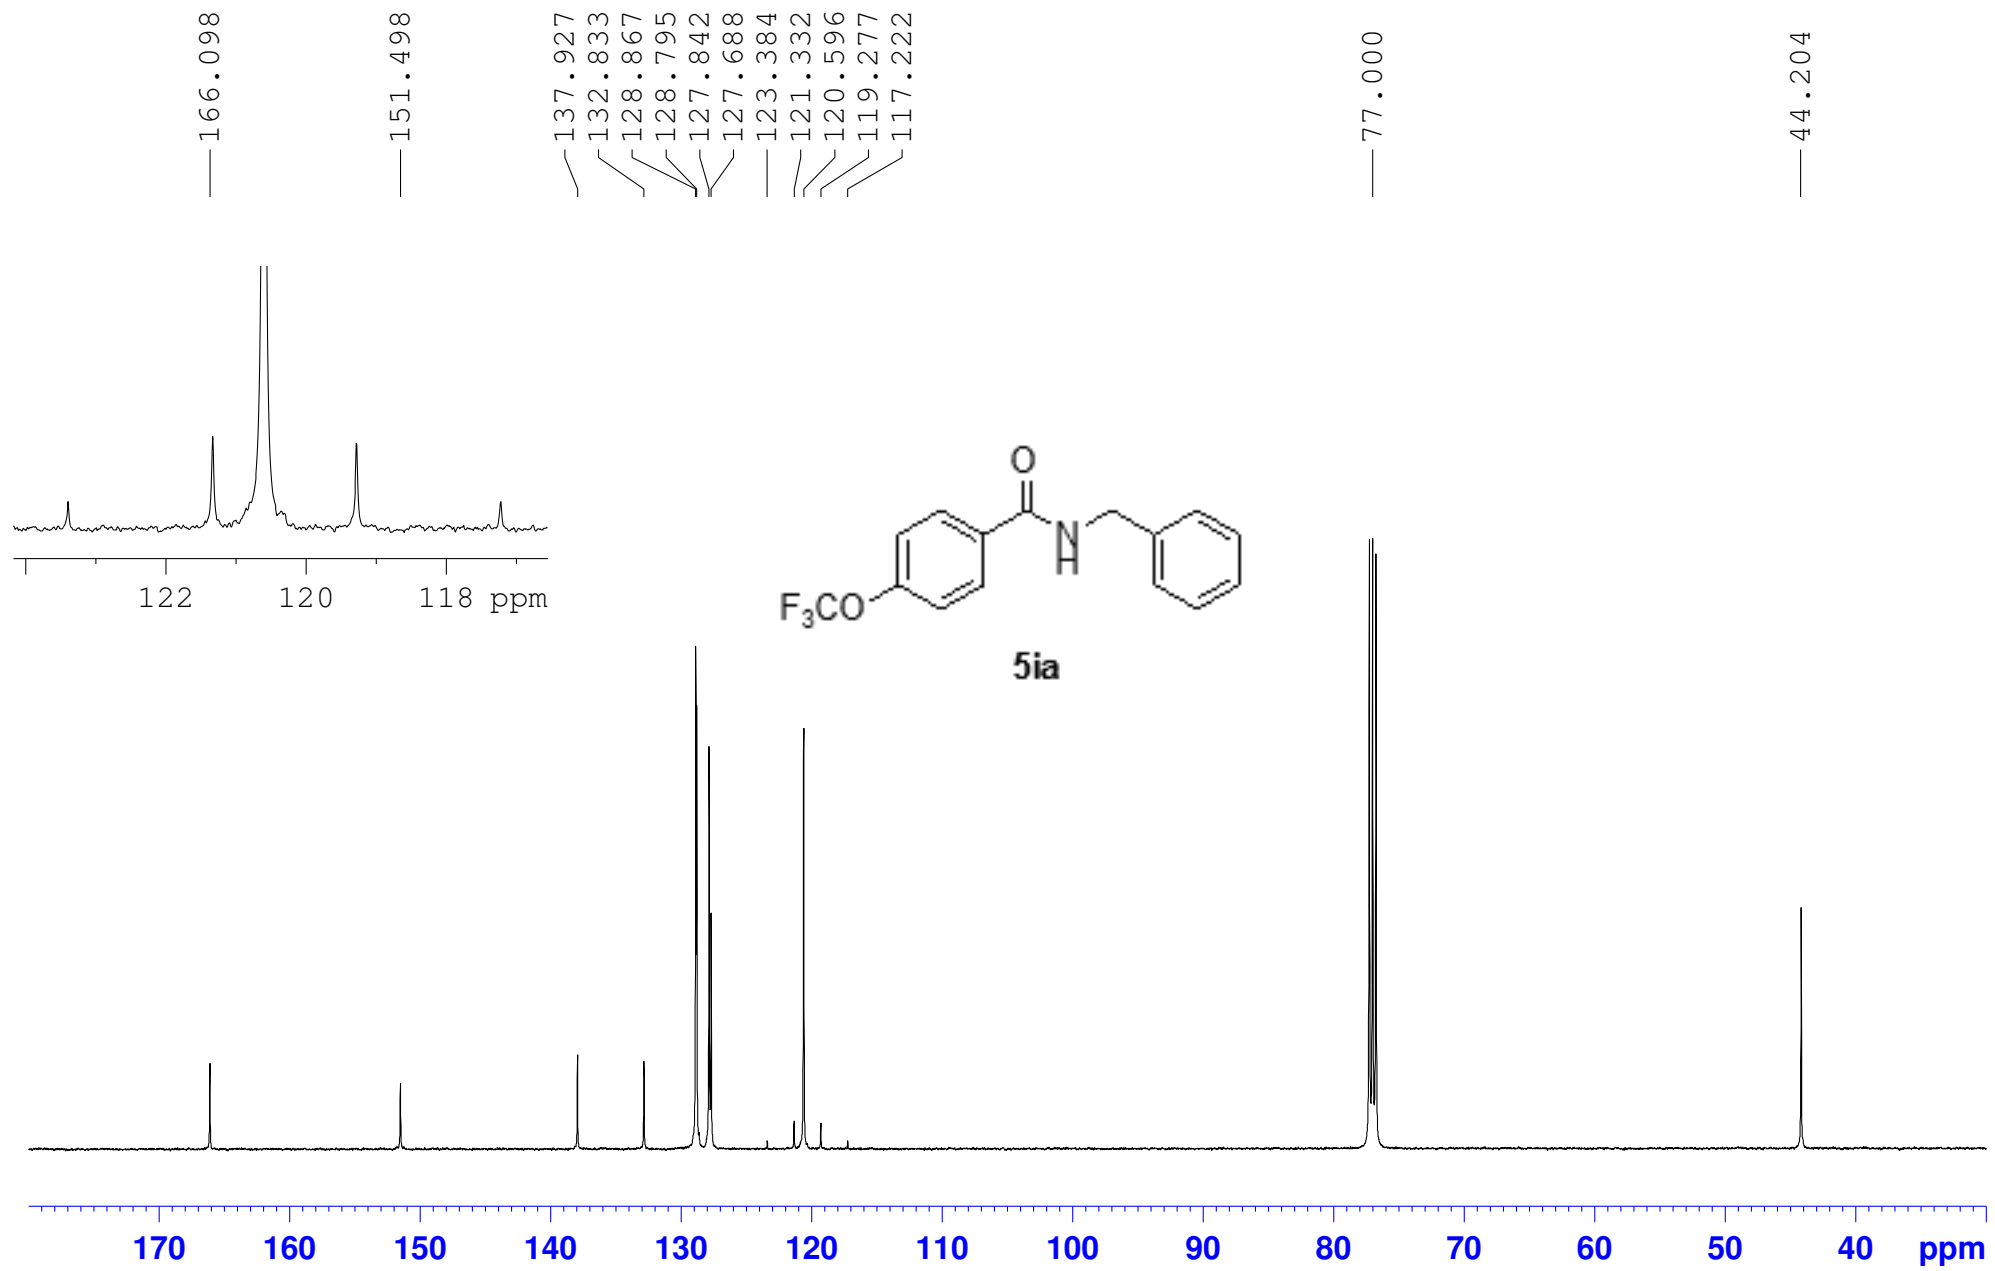

N-benzylfuran-2-carboxamide  
Proton CDCl<sub>3</sub>

7.413  
7.355  
7.346  
7.320  
7.310  
7.302  
7.292  
7.283  
7.276  
7.260  
7.149  
7.143  
6.657  
6.505  
6.501  
6.498  
6.494

4.621  
4.609

0.000

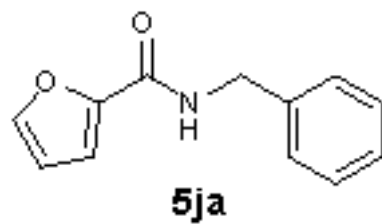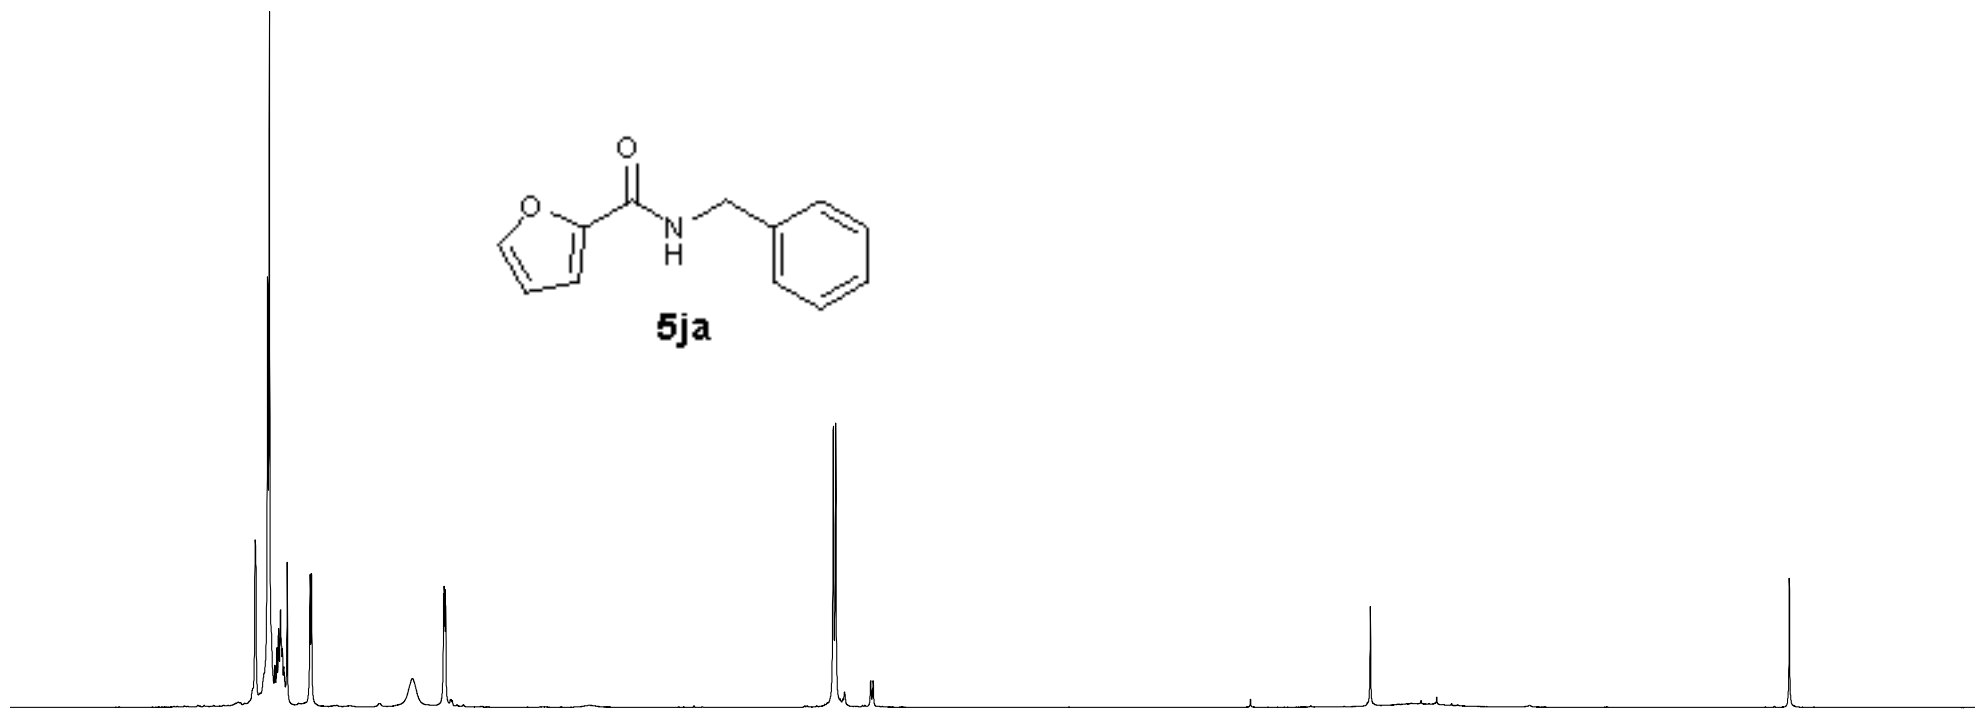

8.0 7.5 7.0 6.5 6.0 5.5 5.0 4.5 4.0 3.5 3.0 2.5 2.0 1.5 1.0 0.5 0.0 ppm

1.00  
6.04  
1.00  
0.98  
1.00

2.00

N-benzylfuran-2-carboxamide  
C13CPD CDCl3

— 158.276  
— 147.821  
— 143.864  
— 137.956  
— 128.663  
— 127.792  
— 127.520  
— 114.331  
— 112.069  
— 77.000  
— 43.082

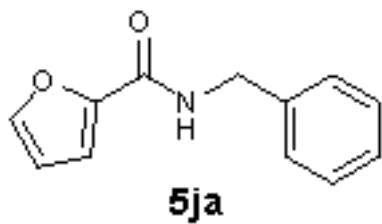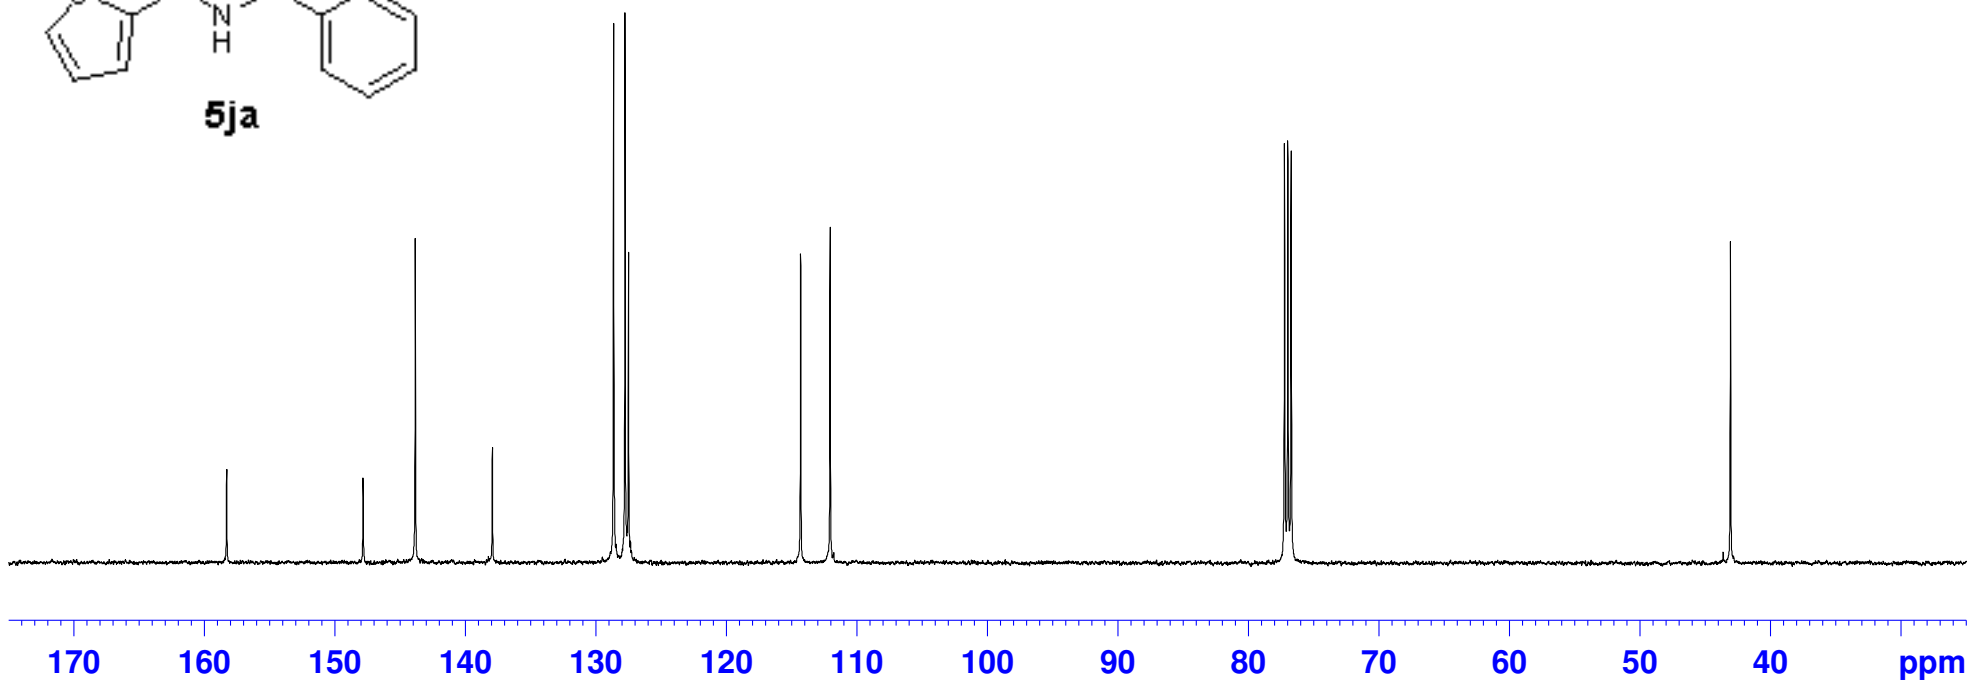

N-benzylthiophene-2-carboxamide  
Proton CDCl<sub>3</sub>

7.508  
7.501  
7.478  
7.468  
7.361  
7.352  
7.325  
7.316  
7.308  
7.299  
7.290  
7.282  
7.258  
7.077  
7.067  
7.060  
6.255

4.632  
4.621

0.000

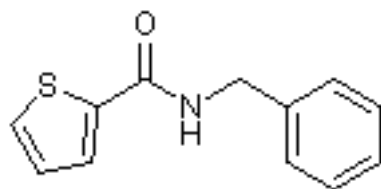

5ka

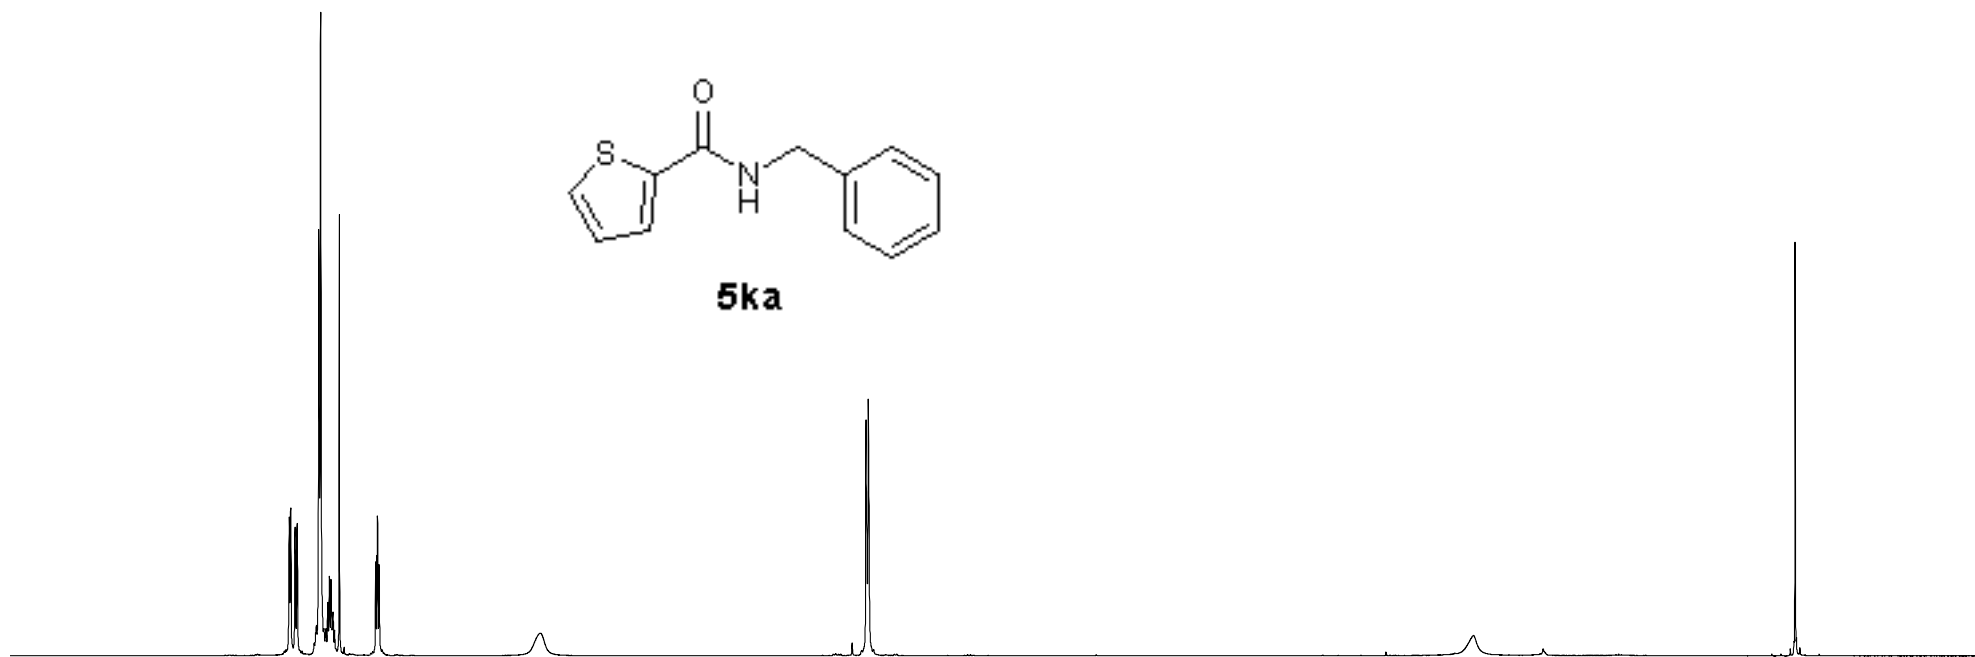

8.5 8.0 7.5 7.0 6.5 6.0 5.5 5.0 4.5 4.0 3.5 3.0 2.5 2.0 1.5 1.0 0.5 0.0 ppm

1.00  
1.00  
4.87  
0.99  
0.97  
2.00

N-benzylthiophene-2-carboxamide  
C13CPD CDCl3

— 161.829

138.762  
138.039  
129.969  
128.688  
128.138  
127.834  
127.580  
127.545

— 77.000

— 43.909

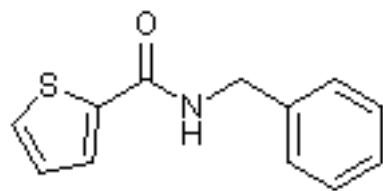

**5ka**

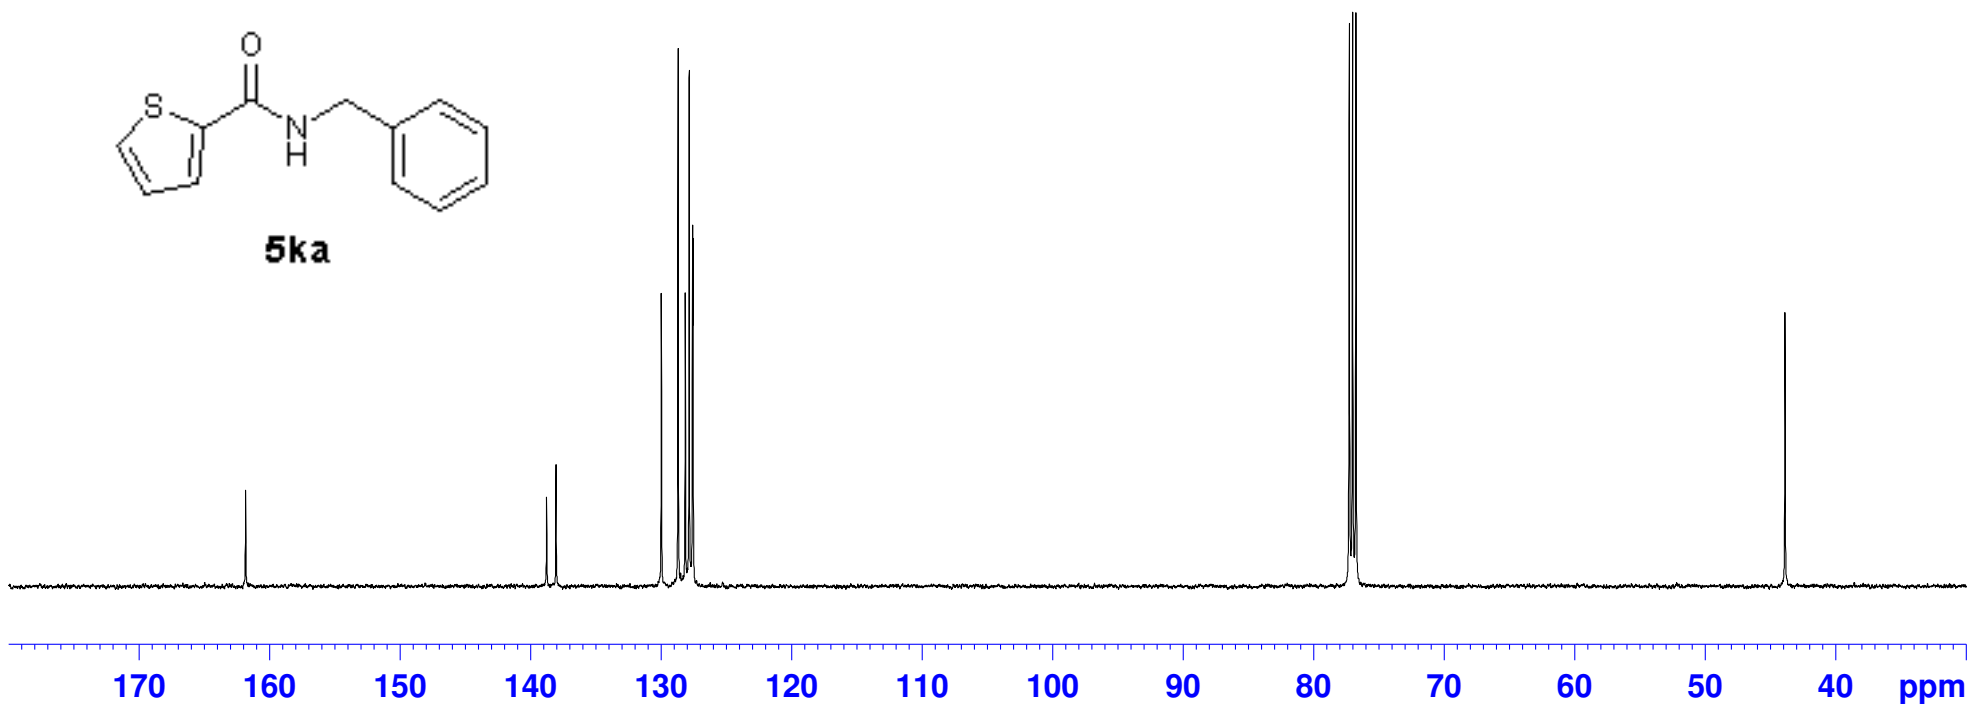

N-benzyl-2-phenylpropanamide  
Proton CDCl<sub>3</sub>

7.358  
7.329  
7.315  
7.261  
7.236  
7.150  
7.136

5.635

4.435  
4.395  
4.353

3.623  
3.609  
3.594  
3.580

1.570  
1.555

0.000

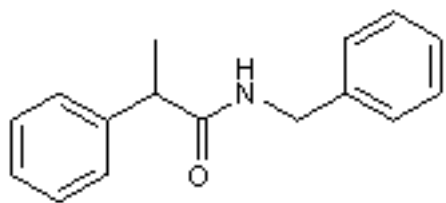

5la

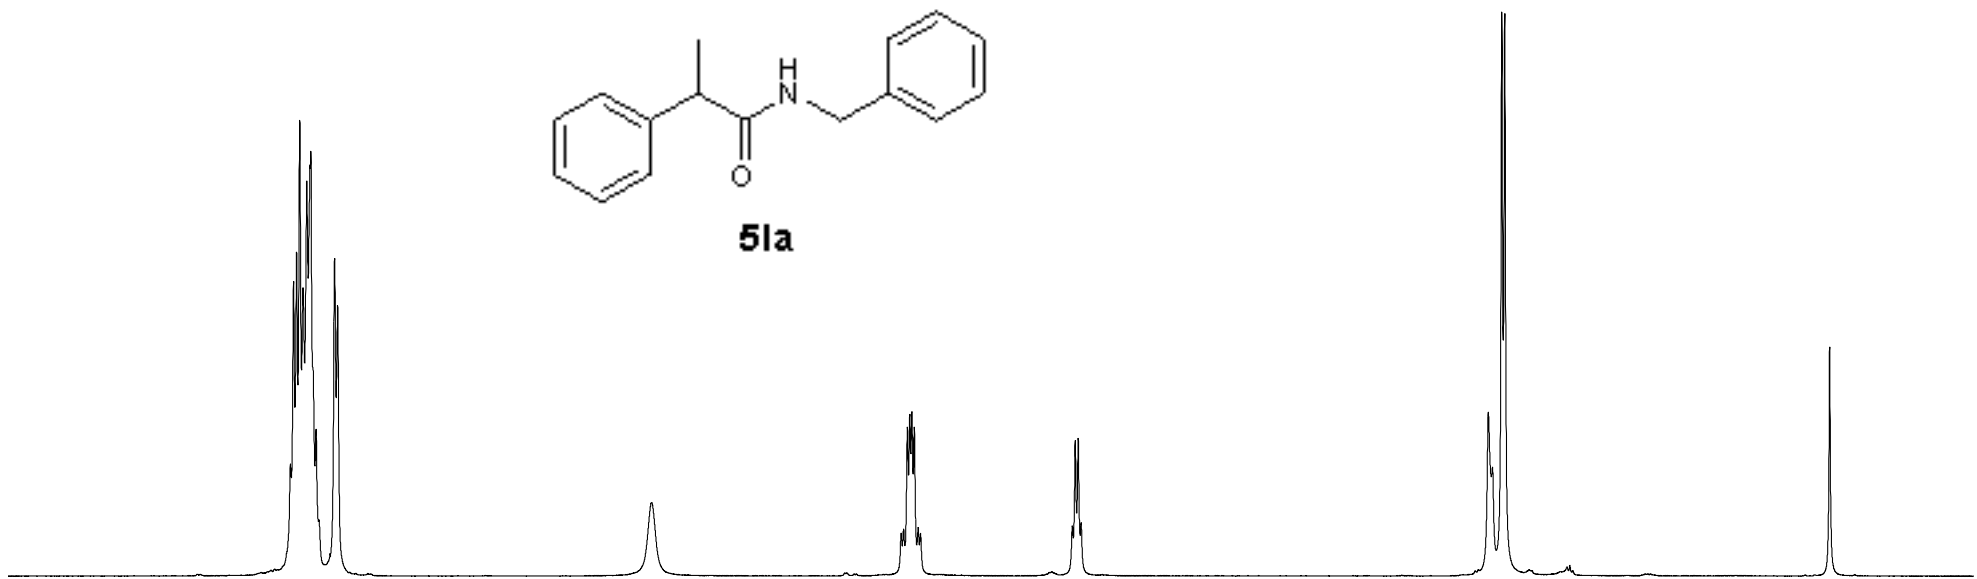

8.5 8.0 7.5 7.0 6.5 6.0 5.0 4.5 4.0 3.0 2.5 2.0 1.5 1.0 0.5 0.0 ppm

8.44  
2.00  
1.00  
2.00  
0.99  
3.01

N-benzyl-2-phenylpropanamide  
C13CPD CDC13

— 174.012

— 141.242  
— 138.260  
— 128.837  
— 128.516  
— 127.569  
— 127.354  
— 127.243  
— 127.203

— 77.001

— 47.024  
— 43.435

— 18.475

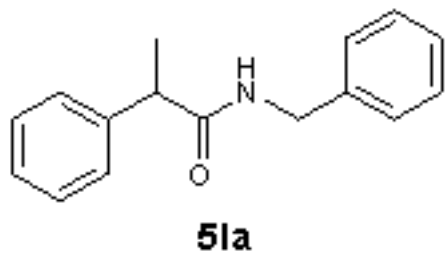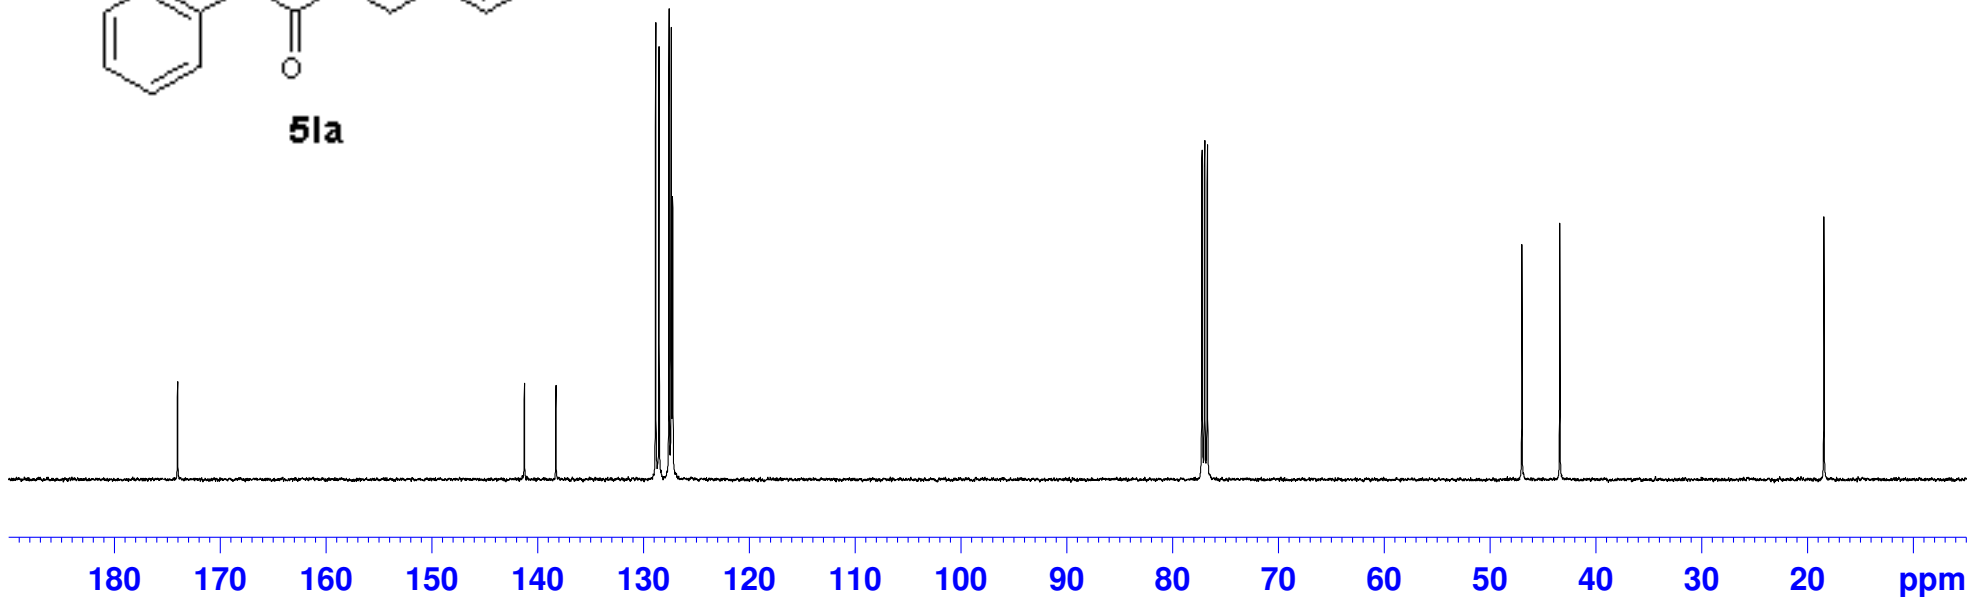



N-benzylbutyramide  
Proton CDCl<sub>3</sub>

7.348  
7.332  
7.318  
7.283  
7.273  
7.267  
7.261

— 5.735

4.449  
4.438

2.208  
2.193  
2.178  
1.731  
1.716  
1.702  
1.687  
1.672  
1.652  
0.975  
0.961  
0.946

— 0.000

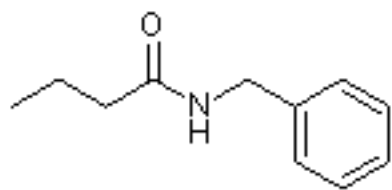

5ma

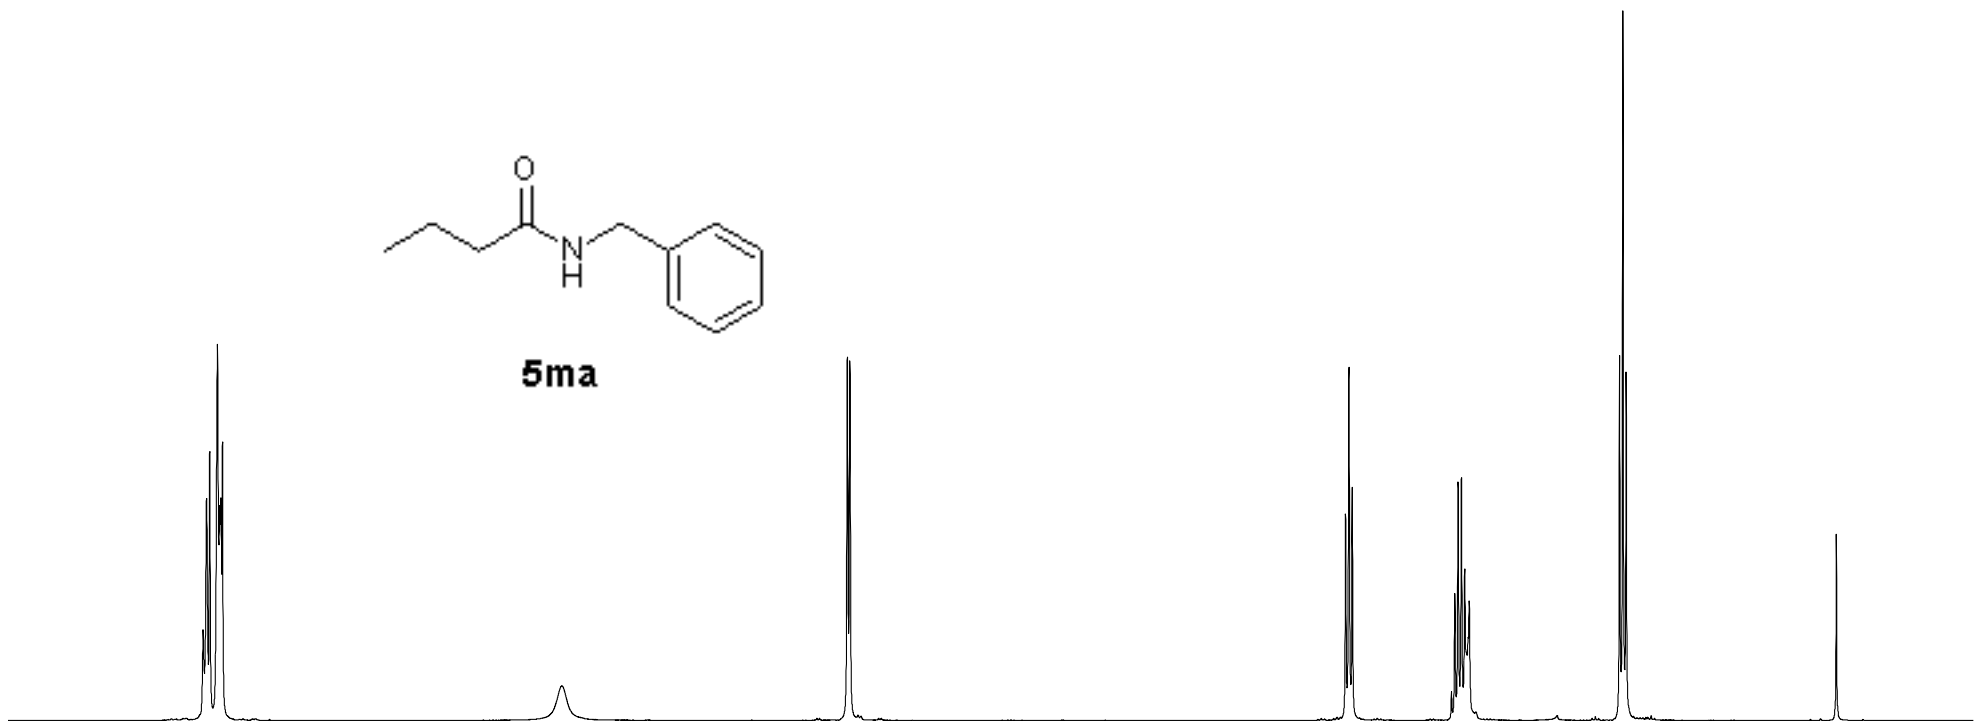

8.0 7.5 7.0 6.5 6.0 5.5 5.0 4.5 4.0 3.5 3.0 2.5 2.0 1.5 1.0 0.5 0.0 ppm

1.95  
3.22

0.98

2.00

2.00

2.78

3.00

N-benzylbutyramide  
C13CPD CDCl3

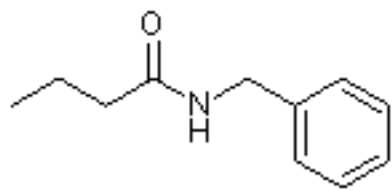

5ma

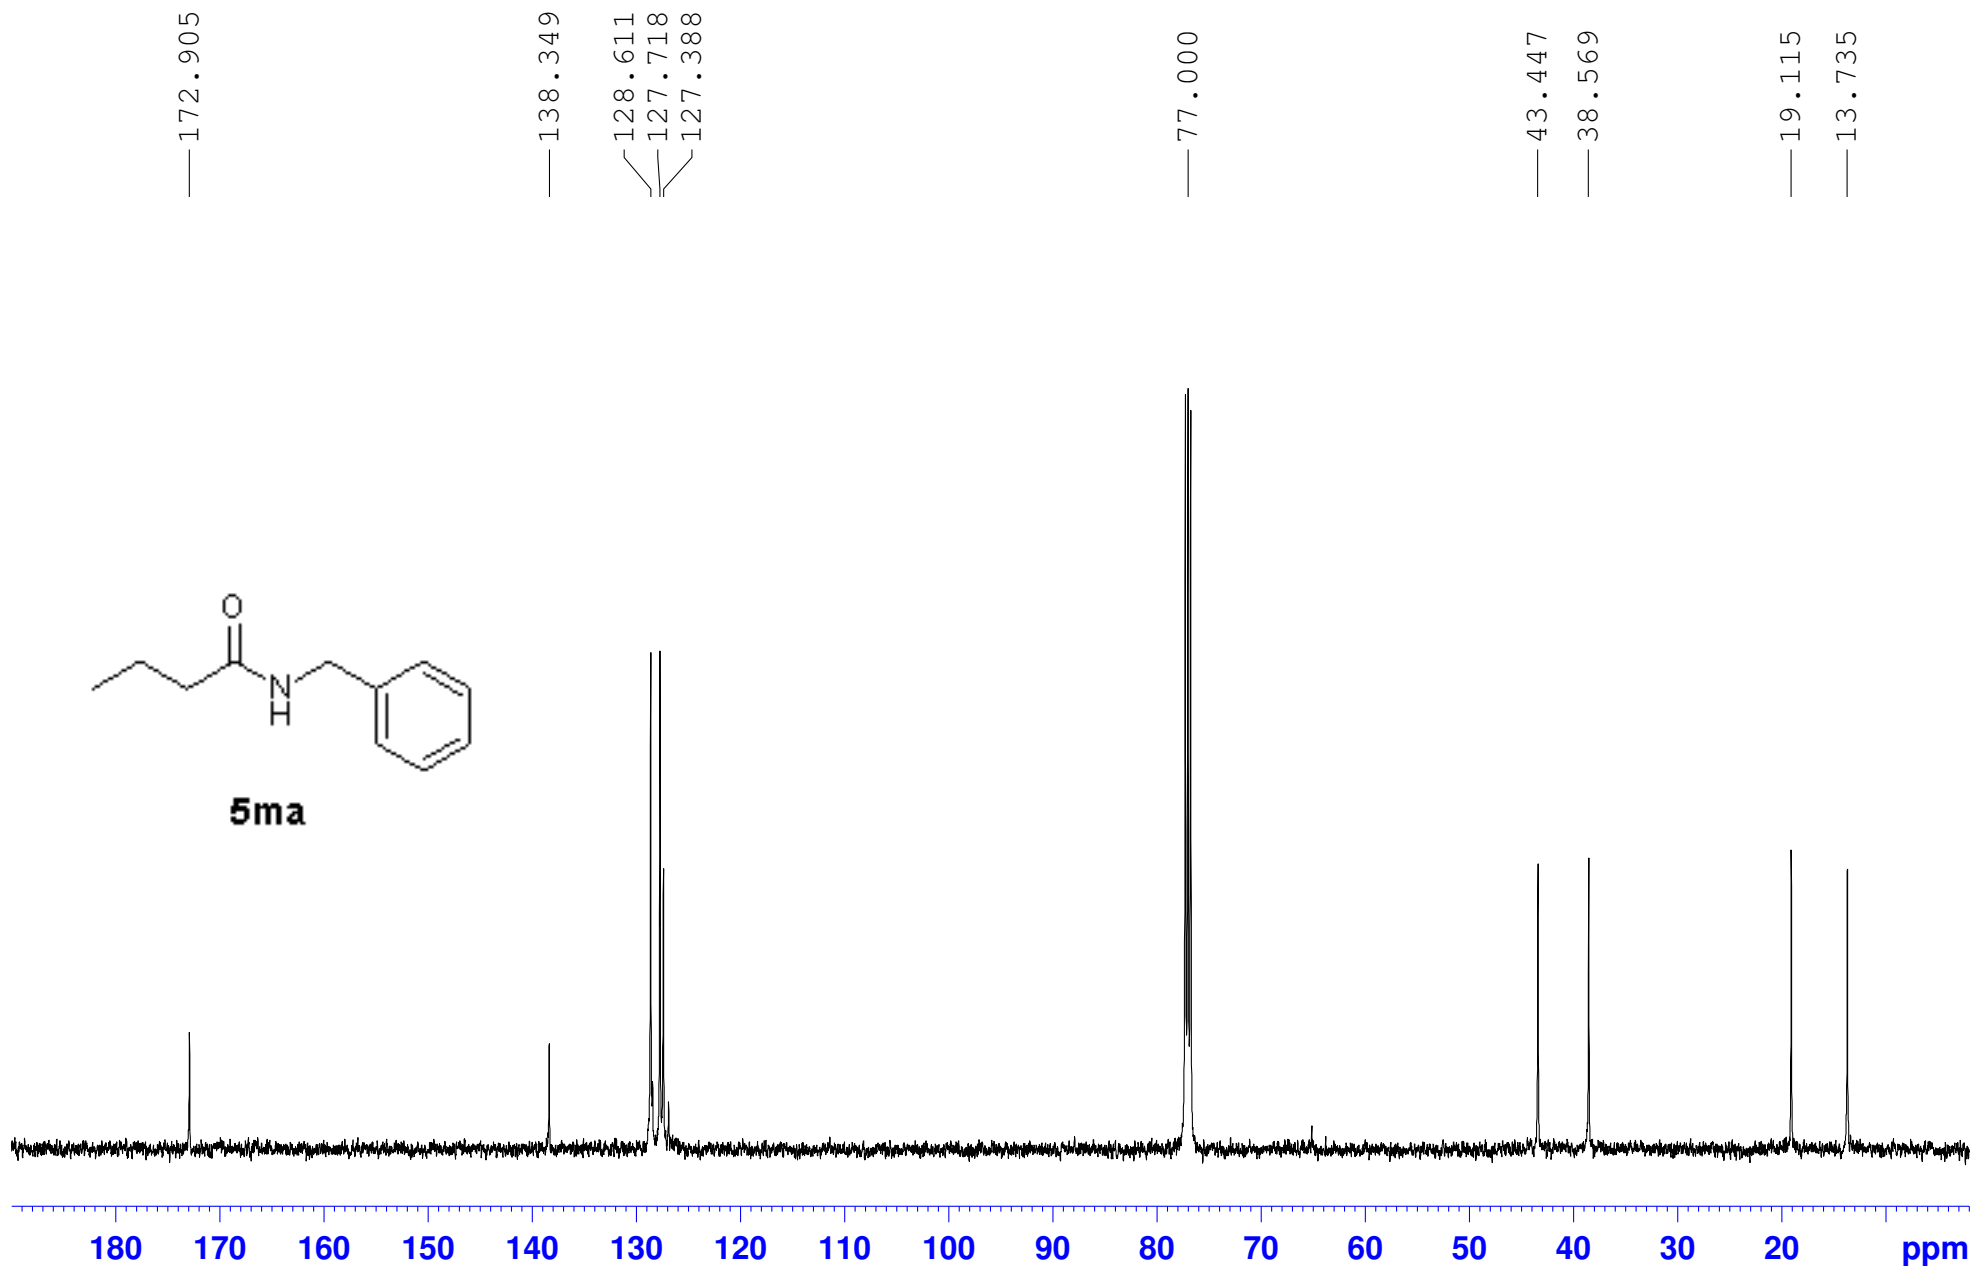

Supplement: c4cc02742f1.pdf [file c4cc02742f1.pdf]
